# Supplementary material for: GRUN: an observation-based global gridded runoff dataset from 1902 to 2014
Source: Copernicus journal article supplement (doi:10.5194/essd-11-1655-2019), 2019-11-13
Supplement: Supplementary file 2 [file essd-11-1655-2019-supplement.zip]

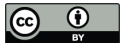

## *Supplement of*

# **GRUN: an observation-based global gridded runoff dataset from 1902 to 2014**

**Gionata Ghiggi et al.**

*Correspondence to:* Gionata Ghiggi ([gionata.ghiggi@epfl.ch](mailto:gionata.ghiggi@epfl.ch))

- [essd-11-1655-2019-supplement-title-page.pdf](#)
- Supplementary Material
  - [GSIM\\_training\\_stations.csv](#)
  - [GSIM\\_training\\_stations.xlsx](#)
  - [KG\\_CV\\_SPACE\\_Skills.csv](#)
  - [KG\\_CV\\_SPACE\\_Skills.xlsx](#)
  - [Revised\\_GRUN\\_paper\\_SM.pdf](#)
  - [SREX\\_CV\\_SPACE\\_Skills.csv](#)
  - [SREX\\_CV\\_SPACE\\_Skills.xlsx](#)

The copyright of individual parts of the supplement might differ from the CC BY 4.0 License.
