# Supplementary material for: GRUN: an observation-based global gridded runoff dataset from 1902 to 2014
Source: Copernicus journal article supplement (doi:10.5194/essd-11-1655-2019), 2019-11-13
Supplement: Supplementary file 3 [file essd-11-1655-2019-supplement.zip]

Archive with 9 entries (8 files):
- essd-11-1655-2019-supplement-title-page.pdf
- Supplementary Material/
- Supplementary Material/Revised_GRUN_paper_SM.pdf
- Supplementary Material/GSIM_training_stations.xlsx
- Supplementary Material/SREX_CV_SPACE_Skills.csv
- Supplementary Material/SREX_CV_SPACE_Skills.xlsx
- Supplementary Material/KG_CV_SPACE_Skills.xlsx
- Supplementary Material/KG_CV_SPACE_Skills.csv
- Supplementary Material/GSIM_training_stations.csv
