# Supplementary material for: GRUN: an observation-based global gridded runoff dataset from 1902 to 2014
Source: Copernicus journal article supplement (doi:10.5194/essd-11-1655-2019), 2019-11-13
Supplement: Supplementary file 3 [file essd-11-1655-2019-supplement.zip › Supplementary Material/GSIM_training_stations.csv]

	gsim.no	river	station	country	latitude	longitude	altitude	area	reference.db	quality
5887	RU_0000195	KUNIA	UVAROVO	RU	56.78	30.93	149	2480	ewa	Medium
5986	GY_0000004	DEMERARA	GREAT FALLS	GY	5.31	-58.53	NA	2460	grdb	Medium
6037	CA_0003783	WAPITI RIVER	ABOVE MISTANUSK CREEK	CA	54.6986083984375	-120.058326721191	NA	2400	hydat	Medium
6045	KG_0000001	TALAS	KARAOY	KG	42.5	72.5	1462	2450	grdb	Medium
6064	CA_0003697	ELLS RIVER	NEAR THE MOUTH	CA	57.2677803039551	-111.714172363281	NA	2450	hydat	Medium
6083	RU_0000299	KOBOZHA	MOSHCHENIK	RU	58.92	36.03	160	2350	ewa	Medium
6096	CA_0000604	MAITLAND RIVER	AT BENMILLER	CA	43.7180595397949	-81.6263885498047	NA	2460	hydat	High
6104	CO_0000024	RIO NEGRO (CO)	GUADUERO	CO	5.2	-74.57	410	2498	grdb	High
6105	CA_0003711	KWADACHA RIVER	NEAR WARE	CA	57.4500007629395	-125.637496948242	NA	2410	hydat	Medium
6130	IN_0000022	Dhadhar	Pingalwada	IN	22.1108	73.0786	2	2400	wris	Medium
6133	US_0008474	PRIEST RIVER	NEAR PRIEST RIVER ID	US	48.2197222	-116.9141667	637.04	2336.169	usgs	Medium
6134	US_0006151	W FK SAN JACINTO RIVER	ABOVE LK HOUSTON NEAR PORTER, TX	US	30.0860514	-95.2999348	10.06	2491.569	usgs	High
6147	IE_0000035	BOYNE	SLANE CASTLE	IE	53.7069	-6.5624	NA	2460.3	grdb	High
6159	US_0004653	HAT CREEK	NEAR EDGEMONT,SD	US	43.2399736	-103.5882519	1005.03	2476.029	usgs	High
6166	TR_0000033	YANARSU CAYI	BESIRI	TR	37.916	41.294	545	2450	grdb	High
6172	EC_0000001	QUIJOS	D.J.OYACACHI	EC	-0.3028	-77.775	1490	2500	grdb	High
6174	CN_0000045	XI ER HE	XIA GUAN	CN	25.63333	100.21667	NA	2470	chdp	High
6178	RU_0000247	VIYA	GAVRINO	RU	62.93	46.38	168	2490	ewa	High
6179	US_0002698	GREAT MIAMI RIVER	AT TROY OH	US	40.04033169	-84.1977209	246.92	2398.329	usgs	High
6183	ZW_0000066	ODZI	ODZI BRIDGE CONTROL SECTION (63422361)	ZW	-18.9167	32.4167	NA	2498	grdb	High
6185	CA_0002755	SWIFT CURRENT CREEK	BELOW REID LAKE	CA	50.0808296203613	-108.044441223145	NA	2470	hydat	High
6186	US_0006579	RIVER HONDO BELOW DIAMOND	AT DAM NEAR ROSWELL, NM	US	33.29986944	-104.721675	1203.88	2494.159	usgs	High
6189	CA_0002422	RED DEER RIVER	NEAR SUNDRE	CA	51.7000007629395	-114.855560302734	NA	2490	hydat	High
6191	IN_0000094	Godavari	Ramakona	IN	21.7189	78.8242	336.38	2500	wris	High
6196	ZA_0000190	MZIMVUBU	KROMDRAAI (27663508)	ZA	-30.5706	29.15	1354	2483	grdb	High
6197	US_0006132	CHAMBERS CREEK	NEAR CORSICANA, TX	US	32.10820817	-96.3708135	89.7	2494.159	usgs	High
6199	CA_0003379	TROUTLAKE RIVER	ABOVE BIG FALLS	CA	50.9056091308594	-93.0919189453125	NA	2332.08	hydat	Medium
6200	ES_0000278	HUEBRA	PUENTE RESBALA	ES	40.9958333333333	-6.625	592	2348	afd	High
6203	BR_0003252	NA	NA	BR	-29.1197	-51.9119	50	2470	ana	High
6204	BR_0000700	RIO POTENGI	TELHA	BR	-5.8669	-35.5942	70	2440	ana	High
6206	FR_0000459	VEZERE	LARCHE	FR	45.12	1.42	NA	2480	ewa	High
6208	BR_0001330	NA	BARRA DO RIO PRETO	BR	-18.6936	-40.8819	162	2500	ana	High
6211	TH_0000021	NAN RIVER	BAN WANG BANG	TH	17.7181	100.5756	NA	2463	game	High
6212	ES_0000854	CABRIEL	ENGUIDANOS	ES	39.6486111111111	-1.57527777777778	673	2456	afd	High
6225	BR_0002219	NA	FAZENDA PAU D'ALHO	BR	-21.8833	-48.7333	NA	2450	ana	High
6226	CA_0000676	GRAND RIVER	NEAR DOON	CA	43.4128112792969	-80.4170303344727	NA	2490	hydat	High
6228	ES_0000413	ALAGON	VALDEOBISPO	ES	40.0875	-6.27111111111111	262	2449	afd	High
6229	AR_0000029	TUNUNYAN	VALLE DE UCO	AR	-33.78	-69.25	1200	2380	grdb	High
6231	ES_0000382	JARAMA	ALGETE	ES	40.5880555555556	-3.56527777777778	585	2448	afd	High
6234	DE_0000534	MAIN	SCHWUERBITZ	DE	50.17	11.15	267.2	2424	ewa	High
6236	US_0002611	TUG FORK	AT WILLIAMSON, WV	US	37.67315699	-82.2801408	188.88	2424.229	usgs	High
6237	CA_0001532	SERPENT RIVER	AU PRES DE LA RIVER PERIBONCA	CA	49.6074981689453	-71.2994384765625	NA	2220	hydat	Medium
6238	MM_0000004	THAUKYEGAT CHAUNG	DOTHAUNG	MM	18.92	96.47	50	2468	grdb	High
6240	BR_0001869	RIO DA PRATA	FAZENDA BURITI DO PRATA	BR	-19.3597	-49.1803	517	2460	ana	High
6243	US_0005846	N WICHITA RIVER	NEAR TRUSCOTT, TX	US	33.82064216	-99.7864822	412.03	2426.819	usgs	High
6244	BR_0003139	NA	BARRAGEM BOITEUX	BR	-26.8992	-49.6628	253	2420	ana	High
6246	US_0006578	RIVER HONDO	AT DIAMOND AT RANCH NEAR ROSWELL, NM	US	33.34916667	-104.8516667	1277.13	2452.719	usgs	High
6247	FR_0000714	SIOULE	ST-POURCAIN SUR SIOULE	FR	46.31	3.29	NA	2460	ewa	High
6252	US_0004573	CRAZY WOMAN CREEK	AT UPPER STA, NEAR ARVADA, WY	US	44.4910905	-106.1778075	1152.16	2426.819	usgs	High
6254	US_0001660	OCONEE RIVER	NEAR PENFIELD, GA	US	33.72123385	-83.2954357	131.98	2434.589	usgs	High
6255	BR_0001291	NA	FAZENDA LIMOEIRO	BR	-16.4242	-39.3536	NA	2410	ana	High
6256	DE_0000761	ALTMUEHL	BEILNGRIES	DE	49.0284	11.4782	364.68	2475	grdb	High
6258	FR_0000310	CREUSE	EGUZON	FR	46.45	1.61	NA	2400	ewa	High
6259	ES_0000759	GUADALQUIVIR	VALCHILLON	ES	37.8241666666667	-4.84666666666667	82	2415	afd	High
6264	IN_0000164	Pennar	Nandipalli	IN	14.7211	79.0189	103	2486	wris	High
6265	PL_0000071	LIWIEC	LOCHOW	PL	52.517	21.717	96	2462	grdb	High
6266	CR_0000023	GENERAL	BRUJO	CR	9.08	-83.27	137	2401	grdb	High
6267	CA_0001226	CHATEAUGUAY RIVER	A 2 KM EN AMONT DU PONTROUTE 132	CA	45.3319396972656	-73.7619400024414	NA	2490	hydat	High
6268	BR_0001832	RIO PIRACANJUBA	JUSANTE PONTE GO-213	BR	-17.7478	-48.845	NA	2410	ana	High
6270	CA_0003391	WABIGOON RIVER	AT DRYDEN	CA	49.8291702270508	-92.8708267211914	NA	2337.27	hydat	High
6277	US_0002842	BARREN RIVER	NEAR FINNEY, KY	US	36.89504634	-86.1338731	121.92	2240.34	usgs	Medium
6282	CA_0001974	PASHKOKOGAN RIVER	AT OUTLET OF PASHKOKOGAN LAKE	CA	51.0373992919922	-90.1979598999023	NA	2230	hydat	Medium
6285	RU_0000480	KHOSEDA-YU	KHOSEDA-KHARD	RU	67.03	59.4	57.5	2280	arcticnet	Medium
6286	CA_0003744	MURRAY RIVER	ABOVE WOLVERINE RIVER	CA	55.0613594055176	-121.013778686523	NA	2370	hydat	High
6288	BR_0001413	RIO GUANHAES	PONTE DAS ARARAS	BR	-19.1167	-42.7833	NA	2420	ana	High
6291	CA_0003999	BULKLEY RIVER	NEAR HOUSTON	CA	54.3993797302246	-126.719413757324	NA	2370	hydat	High
6295	FR_0000422	TRUYERE	SARRANS	FR	44.83	2.73	NA	2460	ewa	High
6296	BR_0001513	RIO PARAITINGA	PONTE DOS MINEIROS	BR	-23.3272	-45.4694	699	2430	ana	High
6300	IE_0000066	BARROW	ROYAL OAK	IE	52.6997	-6.9815	NA	2419.4	grdb	High
6302	US_0004701	REDWATER RIVER	ABOVE BELLE FOURCHE,SD	US	44.66720665	-103.8393696	917.08	2400.919	usgs	High
6303	IN_0000148	Krishna	Talikot	IN	16.4675	76.2844	52	2486	wris	High
6304	CA_0004868	WILLIAMS LAKE RIVER	AT OUTLET OF WILLIAMS LAKE	CA	52.121940612793	-122.139999389648	NA	2240	hydat	Medium
6306	US_0004290	SANGAMON RIVER	AT ROUTE 48 AT DECATUR, IL	US	39.83114814	-88.9764673	177.83	2429.409	usgs	High
6308	RU_0000340	VIATKA	KRASNOGLINJE	RU	58.8	52.42	239	2320	ewa	High
6309	CA_0001212	CHATEAUGUAY RIVER	EN AVAL DE LA ROUTE NO 205	CA	45.2861099243164	-73.8027801513672	NA	2460	hydat	High
6311	BR_0002759	NA	NA	BR	-14.5417	-55.8489	282	2320	ana	High
6312	CA_0005316	ST MARY RIVER	AT WYCLIFFE	CA	49.6002807617188	-115.862777709961	NA	2360	hydat	High
6313	SZ_0000022	ASSEGAAI, MKONDVO	GEGE (68632225)	SZ	-27.0733	31.0483	NA	2404	grdb	High
6314	US_0002279	CHICKASAWHAY RIVER	AT ENTERPRISE, MS	US	32.17583333	-88.8197222	63.28	2377.609	usgs	High
6318	ES_0001048	SEGRE	ORGAÑA	ES	42.2305555555556	1.34444444444444	542	2384	afd	High
6321	BR_0001058	RIO DA BOA SORTE	BREJO NOVO	BR	-12.23	-44.9325	NA	2420	ana	High
6324	BR_0000648	RIO CARIUS	NA	BR	-6.5667	-39.5	235	2430	ana	High
6325	US_0002397	CHEAT RIVER	AT ROWLESBURG, WV	US	39.34620905	-79.6653372	417.04	2431.999	usgs	High
6327	RU_0000232	UMBA	ISTOK	RU	67.53	34.28	148.47	2380	arcticnet	High
6328	FR_0000929	SEINE	COURTENOT	FR	48.15	4.31	145.08	2380	ewa	High
6330	BR_0001831	RIO PIRACANJUBA	FAZENDA PAPUA	BR	-17.7	-48.85	NA	2360	ana	High
6332	FR_0000892	MARNE	SAINT DIZIER	FR	48.64	4.93	135.16	2380	ewa	High
6333	RU_0000296	TUSKAR	KURSK	RU	51.75	36.22	230	2380	ewa	High
6335	CA_0000089	CASCAPEDIA RIVER	EN AMONT DE LA RIVER ANGERS	CA	48.3177795410156	-65.9725036621094	NA	2400	hydat	High
6336	ZA_0000012	RIET	KROMDRAAI (27817212)	ZA	-29.6581	25.9728	1319	2381	grdb	High
6337	BR_0001021	NA	NA	BR	-14.4236	-44.4831	499	2380	ana	High
6340	CA_0006035	ACASTA RIVER	ABOVE LITTLE CRAPEAU LAKE	CA	64.8755569458008	-116.141670227051	NA	2280	hydat	High
6342	IE_0000043	NORE	BROWNSBARN	IE	52.5002	-7.0922	NA	2418.3	grdb	High
6344	TH_0000155	NAM KAM	NA-KAE	TH	16.955	104.5083	137.63	2360	grdb	High
6345	RU_0000354	KONDURCHA	KOSHKI	RU	54.18	50.48	151	2390	ewa	High
6346	CA_0004495	CLEARWATER RIVER	AT INLET TO CLEARWATER LAKE	CA	52.3486099243164	-120.263893127441	NA	2380	hydat	High
6348	BR_0003305	NA	CONTRATO	BR	-31.8667	-52.9	37	2380	ana	High
6352	CA_0004097	SQUAMISH RIVER	NEAR BRACKENDALE	CA	49.7950210571289	-123.203163146973	NA	2350	hydat	High
6354	BR_0001656	RIO POMBA	ASTOLFO DUTRA	BR	-21.3069	-42.8619	232	2350	ana	High
6358	ES_0000283	TERA	MOZAR DE VALVERDE	ES	41.9433333333333	-5.78138888888889	695	2350	afd	High
6359	CN_0000085	NAN LI HE	DONG HU	CN	23.51666667	105.2166667	NA	2369	chdp	High
6363	CA_0004032	KITSUMKALUM RIVER	NEAR TERRACE	CA	54.5819396972656	-128.660278320312	NA	2180	hydat	Medium
6365	BR_0001624	RIO DO PEIXE	NA	BR	-21.9	-43.3667	NA	2340	ana	High
6367	US_0002378	TYGART VALLEY RIVER	AT PHILIPPI, WV	US	39.15037545	-80.038691	390.14	2367.249	usgs	High
6368	US_0006310	N LLANO RIVER	NEAR JUNCTION, TX	US	30.5174101	-99.806179	521.19	2367.249	usgs	High
6369	BR_0003124	NA	RIO DO OESTE	BR	-27.1986	-49.7856	345	2300	ana	High
6370	CA_0002060	WILLOW CREEK	NEAR NOLAN	CA	49.7938919067383	-113.53694152832	NA	2290	hydat	High
6376	FR_0000930	SEINE	BAR SUR SEINE	FR	48.12	4.38	150.18	2340	ewa	High
6380	IE_0000050	BLACKWATER (MUNSTER)	BALLYDUFF	IE	52.1446	-8.0532	7	2333.7	grdb	High
6381	RU_0000243	UPHTYUGA	KOLENO	RU	60.38	44.13	87.68	2360	arcticnet	High
6384	US_0006031	SABINE RIVER	NEAR EMORY, TX	US	32.77318113	-95.7991307	106.77	2299.909	usgs	High
6385	CA_0002367	HIGHWOOD RIVER	NEAR ALDERSYDE	CA	50.6994400024414	-113.856391906738	NA	2311.4	hydat	High
6386	MW_0000009	LUWEYA	MAJIKAPOTWE/ZAYUKA (65312502)	MW	-11.7803	34.225	NA	2320	grdb	High
6387	BR_0000116	RIO SURUMU	VILA SURUMU	BR	4.1961	-60.7939	NA	2280	ana	High
6389	BR_0002592	NA	GUAJUVIRA	BR	-25.6003	-49.5133	857.72	2330	ana	High
6392	CA_0003480	DILLON RIVER	BELOW DILLON LAKE	CA	55.7144393920898	-109.396812438965	NA	2330	hydat	High
6393	CA_0001487	BECANCOUR RIVER	PRES DE SAINTSYLVERE	CA	46.1947212219238	-72.2838897705078	NA	2330	hydat	High
6394	US_0006317	PEDERNALES RIVER	NEAR JOHNSON CITY, TX	US	30.29186695	-98.3994674	334.28	2333.579	usgs	High
6395	US_0002297	PEARL RIVER	AT EDINBURG, MS	US	32.79888889	-89.335	104.14	2341.349	usgs	High
6396	US_0000714	SCHUYLKILL RIVER	AT READING, PA	US	40.3348149	-75.93632	56.54	2279.19	usgs	High
6398	CA_0003815	HEART RIVER	AT PEACE RIVER	CA	56.2305603027344	-117.286109924316	NA	2250	hydat	High
6399	FR_0000764	VIENNE	LE PALAIS	FR	45.86	1.33	223.68	2300	ewa	High
6403	FR_0001174	MEURTHE	DAMELEVIERES	FR	48.56	6.38	NA	2280	ewa	High
6405	BR_0002845	RIO LAVA TUDO	NA	BR	-28.35	-50.3167	842	2320	ana	High
6407	US_0005708	LITTLE RIVER	NEAR SASAKWA, OK	US	34.9653615	-96.5125113	223.04	2299.909	usgs	High
6408	RU_0000301	SUDA	BORISOVO-SUDSKOJE	RU	59.9	36	220	2440	ewa	Medium
6411	US_0008484	NF COEUR D ALENE RIVER	AT ENAVILLE ID	US	47.5722	-116.2528	640.09	2318.039	usgs	High
6413	BR_0000328	RIO MARACA PUCU	PANCADA	BR	-0.1797	-51.7567	NA	2290	ana	High
6417	RU_0000332	BELAYA	ARSKY KAMEN	RU	53.87	58.27	724	2300	ewa	High
6419	BR_0002102	RIO PRETO	NA	BR	-20.2939	-49.6364	418	2320	ana	High
6421	RU_0000342	LOBAN	RYBNAYA VATAGA	RU	57.23	51.03	142	2300	ewa	High
6422	BR_0002855	RIO CANOAS	JOANA	BR	-27.6667	-49.9	900	2320	ana	High
6423	CA_0001940	ALEXIS RIVER	NEAR PORT HOPE SIMPSON	CA	52.648609161377	-56.8712196350098	NA	2310	hydat	High
6424	ES_0000063	NAVIA	DOIRAS (E.)	ES	43.3869444444444	-6.82333333333333	60	2289	afd	High
6426	IN_0000023	Narmada	Dindori	IN	22.9478	81.0761	NA	2292	wris	High
6430	RU_0000439	BALAKHLEY	BALAKHLEY	RU	57.13	69.22	57.7	2140	arcticnet	High
6431	ES_0000104	ULLA	PONTEVEA	ES	42.7605555555556	-8.54611111111111	NA	2291	afd	High
6436	RU_0000245	LEL'	ZELENINSKAYA	RU	62.25	42.67	31.03	2240	arcticnet	High
6439	US_0005927	BIG CYPRESS BAYOU	NEAR JEFFERSON, TX	US	32.74958345	-94.4988102	54.86	2201.49	usgs	High
6441	BR_0000995	NA	NA	BR	-16.4289	-45.7403	490	2300	ana	High
6442	BR_0001444	NA	NA	BR	-19.7431	-41.7853	NA	2260	ana	High
6443	CA_0003448	WEIR RIVER	ABOVE THE MOUTH	CA	57.0230598449707	-93.4530563354492	NA	2190	hydat	High
6445	FR_0000616	ARROUX	RIGNY-SUR-ARROUX	FR	46.5337	4.0339	287.69	2277	grdb	High
6448	RO_0000017	CRISUL-NEGRU	TINCA	RO	46.77	21.93	NA	2216	ewa	High
6449	FR_0000124	ARDECHE	SAUZE ST MARTIN	FR	44.31	4.55	47.25	2240	ewa	High
6451	SZ_0000004	UMBELUZI	MBULUZI (68621020)	SZ	-26.1633	31.8767	NA	2250	grdb	High
6452	BR_0000547	RIO BALSEIROS	NA	BR	-6	-43.9	NA	2290	ana	High
6453	CA_0000083	UPSALQUITCH RIVER	AT UPSALQUITCH	CA	47.8324699401855	-66.887077331543	NA	2270	hydat	High
6454	ES_0000879	CABRIEL	VILLORA	ES	39.7002777777778	-1.61138888888889	672	2199	afd	High
6456	GB_0000171	EDEN (N. ENGLAND)	SHEEPMOUNT	GB	54.905	-2.951	9.9	2286.5	grdb	High
6458	FR_0000140	DURANCE	EMBRUN (LA CLAPIERE)	FR	44.551	6.4859	838.73	2170	grdb	High
6459	US_0000004	AROOSTOOK RIVER	NEAR MASARDIS, MAINE	US	46.52305556	-68.3716667	161.55	2310.269	usgs	High
6460	FR_0000568	SAULDRE	SELLES-SUR-CHER	FR	47.2856	1.5344	125.08	2254	grdb	High
6461	BR_0000667	NA	PAU DOS FERROS	BR	-6.1114	-38.2008	175	2200	ana	High
6462	DE_0000433	HASE	HERZLAKE	DE	52.6826	7.6024	18.2	2218	grdb	High
6463	BR_0001198	RIO DE CONTAS	FAZENDA CANABRAVA	BR	-13.6528	-41.605	NA	2260	ana	High
6465	BR_0001224	NA	ESTIVA DE BAIXO	BR	-14.9339	-39.4675	101	2260	ana	High
6466	CA_0001057	KIPAWA RIVER	AU LAC DUMOINE	CA	46.9702796936035	-78.0425033569336	NA	2110	hydat	Medium
6468	CA_0002520	CLEARWATER RIVER	NEAR DOVERCOURT	CA	52.2521018981934	-114.855819702148	NA	2252.8	hydat	High
6473	MX_0000016	RIO TAMAZULA	TAMAZULA	MX	24.9333	-106.9583	396	2241	grdb	High
6474	US_0002239	LOCUST FORK	AT SAYRE, AL.	US	33.7098268	-86.9833305	78.83	2292.139	usgs	High
6475	CA_0000009	FISH RIVER	NEAR FORT KENT	CA	47.2374992370605	-68.5827789306641	NA	2260	hydat	High
6476	US_0000002	FISH RIVER	NEAR FORT KENT, MAINE	US	47.2375	-68.58277778	155.87	2261.06	usgs	High
6480	CO_0000026	SUAREZ	PTE.NACIONAL	CO	5.87	-73.7	1650	2178	grdb	High
6481	BR_0002925	NA	NA	BR	-27.5219	-54.2322	120	2260	ana	High
6482	BR_0002926	NA	CASCATA BURICA - NOVA	BR	-27.5233	-54.2328	NA	2260	ana	High
6483	FR_0000822	LOING	CHALETTE-SUR-LOING	FR	48.04	2.73	79.09	2300	ewa	High
6486	FR_0000736	ALLIER	VIEILLE BRIOUDE	FR	45.26	3.41	428.03	2270	ewa	High
6487	CA_0000407	MISSISSAGI RIVER	AT ROCKY ISLAND LAKE	CA	46.8666687011719	-83.1552810668945	NA	2150	hydat	High
6488	CA_0000020	TOBIQUE RIVER	AT RILEY BROOK	CA	47.1730308532715	-67.210807800293	NA	2230	hydat	High
6490	BR_0001625	RIO DO PEIXE	NA	BR	-21.8592	-43.4439	513	2240	ana	High
6493	BR_0002633	RIO POTINGA	NA	BR	-25.9111	-50.5256	NA	2210	ana	High
6498	CA_0001546	METABETCHOUANE RIVER	A LA CENTRALE SRPC	CA	48.375560760498	-71.9794387817383	NA	2300	hydat	High
6499	BR_0003303	RIO PIRATINI	PICADA NOVA	BR	-31.8	-52.85	30	2240	ana	High
6502	CA_0004467	HORSEFLY RIVER	AT HORSEFLY	CA	52.3316688537598	-121.412780761719	NA	2310	hydat	High
6503	CA_0002426	RED DEER RIVER	BELOW BURNT TIMBER CREEK	CA	51.6462516784668	-115.019248962402	NA	2245.7	hydat	High
6506	GB_0000128	AVON (CENTRAL ENGLAND)	EVESHAM	GB	52.092	-1.942	19.5	2210	grdb	High
6515	PL_0000064	INA	GOLENIOW	PL	53.567	14.817	2	2163	grdb	High
6516	ZW_0000068	ODZI	ODZI FALLS FLUME (63422362)	ZW	-18.8833	32.4333	NA	2222	grdb	High
6518	US_0003626	CUYAHOGA RIVER	NEAR NEWBURGH HEIGHTS OH	US	41.46255164	-81.680963	153.14	2040.911	usgs	Medium
6519	ES_0000124	MIÑO	LUGO	ES	43.0258333333333	-7.58611111111111	378	2210	afd	High
6520	BR_0000873	NA	NA	BR	-18.6769	-45.5658	NA	2214.8	ana	High
6522	CA_0001545	METABETCHOUANE RIVER	EN AMONT DE LA CENTRALE SRPC	CA	48.375	-71.9936065673828	NA	2280	hydat	High
6524	CA_0001709	NORTHWEST GANDER RIVER	NEAR GANDER LAKE	CA	48.7686080932617	-55.0811080932617	NA	2200	hydat	High
6528	ZA_0000038	WATERVALRIVIER (TRIB.	ELANDSLAAGTE (27817908)	ZA	-26.8614	28.8844	1520	2239	grdb	High
6529	BR_0002670	NA	SALTO CURUCACA JUSANTE	BR	-25.5339	-51.8156	1000	2220	ana	High
6532	CA_0005980	SIKANNI CHIEF RIVER	NEAR FORT NELSON	CA	57.2382202148438	-122.691467285156	NA	2180	hydat	High
6534	ES_0000814	SEGURA	GALLEGO, EL	ES	38.41	-2.01166666666667	450	2185	afd	High
6535	RU_0000271	SREDNIJ EGORLYK	SHABLIEVSKO	RU	46.5	41.63	77	2170	ewa	High
6536	AF_0000036	PANJSHAYR	OMARZ	AF	35.3667	69.6333	2010	2240	grdb	High
6537	BR_0001490	RIO ITAPEMIRIM	RIVE	BR	-20.7469	-41.4661	128	2180	ana	High
6540	RU_0000249	PIZHMA	LEVKINSKAYA	RU	64.77	51.1	124.88	2250	arcticnet	High
6543	HN_0000004	GUAYAPE	GUAYABILAS	HN	14.59	-86.29	NA	2240	grdb	High
6545	US_0006070	VILLAGE CREEK	NEAR KOUNTZE, TX	US	30.3979862	-94.2635215	7.66	2227.39	usgs	High
6546	BR_0002789	RIO JORIGUE	PEDRA PRETA	BR	-16.6067	-54.4586	226	2180	ana	High
6547	CA_0002290	BOW RIVER	AT BANFF	CA	51.1722297668457	-115.571769714355	NA	2209.6	hydat	High
6548	FI_0000133	KYMIJOKI	VUOSJARVI, HUOPANANKOSKI	FI	63.044	25.525	107	2186	grdb	High
6551	CA_0005938	INDIAN RIVER	ABOVE THE MOUTH	CA	63.7700004577637	-139.629577636719	NA	2210	hydat	High
6554	IN_0000029	Narmada	Gadarwara	IN	22.9228	78.7908	NA	2270	wris	High
6555	FI_0000045	KYMIJOKI	AEYKOSKI, KYMIJOKI	FI	63.011389	26.681389	NA	2157	ewa	High
6556	FI_0000131	KYMIJOKI	NILAKKA, AEYSKOSKI	FI	63.012	26.678	105	2157	grdb	High
6560	BR_0002532	NA	PATO BRAGADO	BR	-24.6667	-54.3	179	2200	ana	High
6562	US_0005652	ELK RIVER	NEAR TIFF CITY, MO	US	36.63146127	-94.5868886	228.79	2204.08	usgs	High
6563	US_0005442	SPRING RIVER	AT TOWN BRANCH BRIDGE AT HARDY, AR	US	36.3136111	-91.4827778	NA	2188.54	usgs	High
6567	PA_0000010	TUIRA	BOCA DE CUPE	PA	8.05	-77.5666	50	2242	grdb	High
6569	US_0002437	MAHONING RIVER	AT OHIO EDISON P PLT AT NILES OH	US	41.17255756	-80.75702408	256.97	2211.85	usgs	High
6571	IN_0000103	Godavari	Betmogra	IN	18.7069	77.5447	353	2105	wris	High
6573	CR_0000004	RIO SAN CARLOS	TERRON COLORADO	CR	10.55	-84.48	54	2040	grdb	Medium
6575	BR_0002426	NA	NA	BR	-23.1167	-52	410	2200	ana	High
6577	CA_0001187	MANOUANE RIVER	AU RESERVOIR MANOUANE	CA	47.6344413757324	-74	NA	2240	hydat	High
6580	BR_0002185	RIO JAGUARI	NA	BR	-22.7081	-46.9864	568	2180	ana	High
6581	BR_0002749	RIO JAURU	FAZENDA SALU	BR	-15.1839	-58.7281	360	2190	ana	High
6582	BR_0001443	NA	CACHOEIRA DA NEBLINA	BR	-19.8167	-41.7833	365	2060	ana	Medium
6585	ES_0000866	JUCAR	OLIVARES	ES	39.7419444444444	-2.29722222222222	806	2180	afd	High
6586	GB_0000029	TYNE	BYWELL	GB	54.95	-1.9422	14	2175.6	grdb	High
6587	US_0002502	WILLS CREEK BELOW WILLS CREEK DAM	AT WILLS CREEK OH	US	40.15951555	-81.8473527	218.54	2180.77	usgs	High
6591	IN_0000250	Mahanadi	Andhiyarkore	IN	21.8325	81.6039	264.93	2210	wris	High
6592	CA_0001881	NA	FALSE RIVER	CA	57.6708297729492	-68.2699966430664	NA	2140	hydat	High
6593	ZW_0000020	MUPFURE	BEATRICE G/W (63341070)	ZW	-18.25	30.7667	NA	2221	grdb	High
6594	RU_0000184	ZAP.DVINA	ZAP.DVINA	RU	56.23	32.08	228	2180	ewa	High
6595	US_0002097	COOSAWATTEE RIVER	NEAR PINE CHAPEL, GA	US	34.56416667	-84.8330556	187.81	2152.28	usgs	High
6597	US_0006377	SAN MARCOS RIVER	AT LULING, TX	US	29.66634037	-97.6508314	98.16	2170.41	usgs	High
6598	CA_0006228	BATTLE CREEK	BELOW NASHLYN PROJECT	CA	49.1636695861816	-109.464942932129	NA	2210	hydat	High
6607	BR_0002942	RIO IJUIZINHO	NA	BR	-28.3897	-54.3308	200	2160	ana	High
6609	IE_0000081	SUIR	CLONMEL	IE	52.3519	-7.6955	NA	2143.7	grdb	High
6610	CA_0004849	CHILKO RIVER	AT OUTLET OF CHILKO LAKE	CA	51.6248588562012	-124.143356323242	NA	2130	hydat	High
6612	US_0006131	CHAMBERS CREEK	NEAR RICE, TX	US	32.1984823	-96.5202639	103.63	2090.12	usgs	High
6614	US_0002585	GUYANDOTTE RIVER	AT LOGAN, WV	US	37.84232616	-81.9759574	195.01	2157.46	usgs	High
6615	FR_0000792	ARMANCON	JAULGES	FR	47.97	3.79	107.66	2160	ewa	High
6616	MX_0000045	RIO ANTIGUA	CARDEL	MX	19.3617	-96.36	80	2234	grdb	High
6617	BR_0002203	RIO ATIBAIA	NA	BR	-22.9283	-46.9392	NA	2152	ana	High
6618	ES_0001001	ARBA DE LUESIA	GALLUR	ES	41.8869444444444	-1.30444444444444	230	2249	afd	High
6619	US_0006150	W FK SAN JACINTO RIVER	NEAR CONROE, TX	US	30.24465738	-95.4571616	0	2144.51	usgs	High
6620	CA_0003736	GRAHAM RIVER	ABOVE COLT CREEK	CA	56.4598617553711	-122.354530334473	NA	2140	hydat	High
6625	BR_0000578	RIO NEVES	NEVES BR-230	BR	-7.0372	-45.5008	NA	2140	ana	High
6627	CA_0003673	HORSE RIVER	AT ABASANDS PARK	CA	56.7080612182617	-111.394439697266	NA	2130	hydat	High
6628	BR_0002236	NA	FAZENDA DO PORTO	BR	-21.8572	-48.3894	469	2170	ana	High
6633	CA_0000087	BONAVENTURE RIVER	EN AMONT DU PONT	CA	48.0999984741211	-65.461669921875	NA	2150	hydat	High
6635	CA_0001630	NABISIPI RIVER	A 24 KM DE LEMBOUCHURE	CA	50.253059387207	-62.2122192382812	NA	2060	hydat	High
6636	RU_0000260	ARCHEDA	NIZHNIANSKY	RU	49.87	43.18	140	2050	ewa	High
6639	CA_0005859	KETTLE RIVER	NEAR WESTBRIDGE	CA	49.2300491333008	-118.928123474121	NA	2140	hydat	High
6648	CA_0005380	DUNCAN RIVER	NEAR HOWSER	CA	50.285831451416	-116.945556640625	NA	2160	hydat	High
6650	CZ_0000009	JIZERA	TURICE	CZ	50.24	14.78	175	2159	grdb	High
6651	RU_0000337	TYUI	GUMBINO	RU	55.98	57.05	229	2180	ewa	High
6652	US_0006412	CIBOLO CREEK	NEAR FALLS CITY, TX	US	29.01413869	-97.9302808	80.55	2141.92	usgs	High
6653	BR_0001817	NA	DF-18 / BR 251	BR	-15.9478	-47.6678	845.08	2132	ana	High
6656	DE_0000631	RUR	STAH	DE	51.0976	6.1042	32.45	2105	grdb	High
6657	HU_0000028	KAPOS	KURD	HU	46.45	18.3167	104	2119	grdb	High
6658	RU_0000236	TUMCHA	ALAKURTTI	RU	66.95	30.37	320	2100	ewa	High
6661	CA_0001991	PAGWACHUAN RIVER	AT HIGHWAY NO 11	CA	49.7641906738281	-85.226188659668	NA	2118.44	hydat	High
6667	CA_0000985	MATTAWA RIVER	NEAR RUTHERGLEN	CA	46.3012313842773	-78.8786010742188	NA	2040	hydat	High
6668	CA_0001672	UPPER HUMBER RIVER	NEAR REIDVILLE	CA	49.242919921875	-57.3602485656738	NA	2110	hydat	High
6669	US_0006244	LAMPASAS RIVER	NEAR KEMPNER, TX	US	31.0793403	-98.0166919	252.49	2118.61	usgs	High
6671	FR_0000520	ISLE	PERIGUEUX	FR	45.18	0.7	NA	2120	ewa	High
6672	US_0005701	REVUELTO CREEK	NEAR LOGAN, NM	US	35.3443861	-103.3896056	1115.58	2035.731	usgs	High
6674	FR_0000412	LOT	ENTRAYGUES (AMONT)	FR	44.63	2.58	NA	2180	ewa	High
6678	US_0005567	SALT FORK ARKANSAS RIVER	NEAR WINCHESTER, OK	US	36.96169595	-98.7823116	429.79	2217.03	usgs	High
6680	CR_0000034	SIXAOLA	BRATSI	CR	9.55	-82.88	35	2121	grdb	High
6681	BR_0000654	RIACHO DOS PORCOS	NA	BR	-7.6167	-38.8833	380	2070	ana	High
6685	US_0002647	PAINT CREEK	NEAR BOURNEVILLE OH	US	39.2636763	-83.16685208	202.72	2090.12	usgs	High
6689	DE_0000028	ZWICKAUER MULDE	WECHSELBURG 1	DE	51.0068	12.7725	159.89	2107	grdb	High
6694	BR_0001030	NA	NA	BR	-12.9944	-44.8053	NA	2120	ana	High
6696	CA_0000586	SAUGEEN RIVER	NEAR WALKERTON	CA	44.1204681396484	-81.1153335571289	NA	2136.36	hydat	High
6701	BR_0001305	RIO MUCURI	MUCURI	BR	-17.5961	-41.4914	NA	2080	ana	High
6708	SK_0000028	NITRA	NITRIANSKA STREDA	SK	48.5244	18.1741	158	2094	grdb	High
6710	IN_0000167	Sarada	Anakapally	IN	17.6861	82.9953	47	2090	wris	High
6712	RU_0000253	LESNOY VORONEZH	ZAVORONEZHJ	RU	52.88	40.48	160	2000	ewa	High
6713	GB_0000219	TWEED (SCOTLAND)	DRYBURGH	GB	55.58	-2.65	67	2080	grdb	High
6715	BR_0000191	RIO MACHADINHO	NA	BR	-9.7333	-62.2333	NA	2130	ana	High
6716	FR_0000186	OGNON (TRIB. RHONE)	PESMES	FR	47.2923	5.5444	232.68	2038	grdb	High
6717	BR_0002097	RIO TURVO	NA	BR	-20.8561	-48.9725	500	2070	ana	High
6719	TH_0000027	NAN RIVER	BAN HAT KHAO	TH	18.5689	100.8744	NA	2107	game	High
6720	CA_0005001	LILLOOET RIVER	NEAR PEMBERTON	CA	50.3360214233398	-122.800247192383	NA	2100	hydat	High
6722	CA_0000118	NEPISIGUIT RIVER	NEAR PABINEAU FALLS	CA	47.4944381713867	-65.6805572509766	NA	2090	hydat	High
6723	US_0006351	LAVACA RIVER	NEAR EDNA, TX	US	28.95998449	-96.6863668	4.3	2116.02	usgs	High
6724	CA_0003716	OSPIKA RIVER	ABOVE ALEY CREEK	CA	56.5241088867188	-123.936027526855	NA	2190	hydat	High
6725	KR_0000003	YONGSAN-GANG	NA JU	KR	35.0333	126.7336	1.31	2058.7	grdb	High
6728	US_0000549	RARITAN RIVER BELOW CALCO DAM	AT BOUND BROOK NJ	US	40.5511111	-74.5483333	0	2004.651	usgs	High
6729	BY_0000025	PTICH	DARAGANOVO (KOMARINO)	BY	53.2	28.43	152.07	2010	ewa	High
6730	US_0004590	LITTLE MUDDY RIVER	BELOW COW CREEK NEAR WILLISTON, ND	US	48.2844683	-103.5729718	567.9	2007.241	usgs	High
6731	BR_0000926	RIO DO BICUDO	PONTE DO BICUDO	BR	-18.1961	-44.57	501	2070	ana	High
6737	US_0005813	HOMOCHITTO RIVER	AT ROSETTA, MS	US	31.3247222	-91.1094444	28.77	2038.321	usgs	High
6739	CA_0005961	HYLAND RIVER	AT KILOMETRE 1085 NAHANNI RANGE ROAD	CA	61.4868087768555	-128.242141723633	NA	2150	hydat	High
6743	BR_0003220	RIO PARDO	PASSO DO MEIO	BR	-29.8167	-52.55	15	2070	ana	High
6745	BR_0000426	RIO CLARO	NA	BR	-16.5125	-50.9967	487	2060	ana	High
6746	CA_0002130	LITTLE BOW RIVER	BELOW TWIN VALLEY RESERVOIR	CA	50.2248115539551	-113.396636962891	NA	1963	hydat	High
6747	CA_0001787	BELL RIVER	A SENNETERRE3	CA	48.3877792358398	-77.230827331543	NA	2110	hydat	High
6748	CA_0001789	BELL RIVER	A SENNETERRE4	CA	48.3875007629395	-77.2383270263672	NA	2110	hydat	High
6749	BR_0000644	RIO PIRANGI	CRISTAIS	BR	-4.5006	-38.3608	50	2040	ana	High
6750	CA_0001112	NORD RIVER	DU A SAINTANDREEST	CA	45.5661087036133	-74.3358306884766	NA	2070	hydat	High
6753	US_0006994	CHEVELON CREEK	NEAR WINSLOW, AZ	US	34.92641305	-110.5315176	1493.39	2022.781	usgs	High
6754	US_0007159	HASSAYAMPA RIVER	NEAR MORRISTOWN, AZ.	US	33.88503188	-112.6621198	558.14	2061.631	usgs	High
6755	US_0002561	GAULEY RIVER	BELOW SUMMERSVILLE DAM, WV	US	38.2151103	-80.8881536	411.32	2087.53	usgs	High
6756	US_0003106	NOLICHUCKY RIVER	AT EMBREEVILLE, TN	US	36.1764961	-82.457364	463.09	2084.94	usgs	High
6757	BR_0002941	RIO IJUIZINHO	USINA VELHA	BR	-28.4511	-54.2806	254	2050	ana	High
6760	CA_0001987	NAGAGAMI RIVER	AT HIGHWAY NO 11	CA	49.7728881835938	-84.5369415283203	NA	2178.36	hydat	Medium
6763	RU_0000248	VEL'-YU	KONOSH-YEL'	RU	63.4	55.8	97.5	2050	arcticnet	High
6764	BR_0001893	RIO GRANDE	MADRE DE DEUS DE MINAS	BR	-21.4925	-44.3269	875	2070	ana	High
6767	US_0002208	BUTTAHATCHEE RIVER	NEAR ABERDEEN, MS	US	33.79	-88.3152778	67.36	2066.811	usgs	High
6770	BR_0000033	NA	FAZENDA PARANACRE	BR	-7.9511	-71.4822	NA	2070	ana	High
6772	ZW_0000002	DEKA	DEKA GOURLAY BLOCK FLUME (63351265)	ZW	-18.3833	26.3167	NA	2138	grdb	High
6773	US_0008649	BIG WOOD RIVER	NEAR BELLEVUE, ID	US	43.32805556	-114.3416667	1469.15	2134.15	usgs	High
6774	BR_0002517	RIO GOIO-ERE	BALSA DO GOIO - ERE	BR	-23.9167	-53.1331	320	2040	ana	High
6775	CA_0001642	RIVER	JOIR NEAR PROVINCIAL BOUNDARY	CA	52.163890838623	-60.059440612793	NA	2060	hydat	High
6780	BR_0001442	NA	PCH NEBLINA JUSANTE	BR	-19.8731	-41.8108	444	2050	ana	High
6785	BR_0003251	NA	LINHA COLOMBO	BR	-28.9122	-51.9531	192	2030	ana	High
6788	FR_0000019	DOUBS	MATHAY	FR	47.44	6.79	NA	2200	ewa	Medium
6789	US_0006443	SAN MIGUEL CREEK	NEAR TILDEN, TX	US	28.58748787	-98.5458513	74.05	2027.961	usgs	High
6790	BR_0000559	RIO PREGUICAS	MORRO ALTO	BR	-2.9686	-42.9467	NA	2040	ana	High
6791	CA_0005838	GRANBY RIVER	AT GRAND FORKS	CA	49.043270111084	-118.4404296875	NA	2060	hydat	High
6792	BR_0001368	RIO CASCA	RIO CASCA	BR	-20.2261	-42.65	329	2030	ana	High
6793	BR_0001109	NA	CAPIVARA II	BR	-9.7664	-37.0081	NA	2020	ana	High
6795	ES_0000611	GEVORA	VALDEBOTOA	ES	38.965	-6.9275	178	1889	afd	Medium
6797	DZ_0000002	MAZAFRAN	FER A CHEVAL	DZ	36.67	2.82	10	1912	grdb	High
6803	IN_0000135	Krishna	Kuppelur	IN	14.5	75.6339	533.4	1850	wris	Medium
6805	BR_0000940	NA	BARRA DO ESCURINHO	BR	-17.5125	-46.6461	560	2000	ana	High
6807	ES_0000590	BULLAQUE	PUENTE DE LUCIANA	ES	38.9863888888889	-4.28611111111111	536	2029	afd	High
6810	BR_0003259	NA	NOVA PALMIRA	BR	-29.3356	-51.1883	50	2030	ana	High
6811	CA_0003816	HEART RIVER	NEAR NAMPA	CA	56.0556411743164	-117.129890441895	NA	1968.1	hydat	High
6813	BR_0002919	RIO GUARITA	PALMITINHO	BR	-27.3328	-53.6414	240	2020	ana	High
6815	US_0006030	SABINE RIVER	NEAR WILLS POINT, TX	US	32.8062358	-95.9194109	112.78	1958.031	usgs	High
6816	CA_0000386	MAGPIE RIVER	NEAR MICHIPICOTEN	CA	47.9388885498047	-84.8305587768555	NA	1930	hydat	High
6818	US_0002221	NOXUBEE RIVER	AT MACON, MS	US	33.0723611	-88.5587778	41.73	1989.111	usgs	High
6821	BR_0002339	RIO DAS CINZAS	TOMAZINA	BR	-23.7667	-49.95	483	2020	ana	High
6824	BR_0000618	RIO BURITI	NA	BR	-3.36	-42.4197	NA	2030	ana	High
6826	IN_0000055	Vaitarna	Durvesh	IN	19.7131	72.93	NA	2019	wris	High
6827	BR_0001616	RIO PIABANHA	MOURA BRASIL	BR	-22.1417	-43.1575	259.7	2040	ana	High
6828	BR_0001617	RIO PIABANHA	UHE ILHA DOS POMBOS FAZENDA BARREIRA	BR	-22.1414	-43.1586	191	2040	ana	High
6830	DE_0000635	RUHR	VILLIGST	DE	51.436	7.5811	105.83	1988	grdb	High
6831	CA_0004070	KITIMAT RIVER	BELOW HIRSCH CREEK	CA	54.0487213134766	-128.690505981445	NA	1990	hydat	High
6838	BR_0003135	NA	AURORA	BR	-27.2936	-49.6506	338	1990	ana	High
6842	BR_0002878	RIO DO PEIXE	NA	BR	-27.0881	-51.2581	630	2010	ana	High
6844	BR_0002620	NA	NA	BR	-25.9456	-49.7914	750	2000	ana	High
6845	BR_0002621	NA	NA	BR	-25.9456	-49.7914	NA	2000	ana	High
6846	BR_0002932	NA	PASSO FAXINAL	BR	-28.2869	-53.7808	200	1940	ana	High
6850	BR_0002304	NA	BURI	BR	-23.8	-48.5833	564	2020	ana	High
6851	BR_0002305	NA	BURI	BR	-23.8	-48.5833	NA	2010	ana	High
6853	BR_0000344	RIO DAS ALMAS	NA	BR	-15.7119	-49.3333	601	1980	ana	High
6855	CA_0004895	SAN JOSE RIVER	ABOVE BORLAND CREEK	CA	52.0770797729492	-121.991889953613	NA	1990	hydat	High
6857	AF_0000021	KAWGAN	TANGI AZU	AF	34.1333	64.2	2200	2030	grdb	High
6858	BR_0000808	RIO ITAPECIRICA	NA	BR	-20.15	-44.8833	664	1960	ana	High
6859	BR_0000093	NA	PARI CACHOEIRA	BR	0.2494	-69.785	NA	1970	ana	High
6863	DE_0000149	NAAB	UNTERKOEBLITZ	DE	49.5356	12.1539	372.16	2004	grdb	High
6865	BR_0000343	RIO DAS ALMAS	NA	BR	-15.7186	-49.3278	545.4	1970	ana	High
6866	SE_0000062	VISKAN	ASBRO 3	SE	57.2398	12.31	2	2160.2	grdb	Medium
6867	FR_0000879	CHIERS	CARIGNAN	FR	49.6284	5.1587	203.03	1967	grdb	High
6868	ES_0000593	ZANCARA	PROVENCIO, EL	ES	39.3597222222222	-2.5775	698	2020	afd	High
6869	BR_0002027	RIO UBERABA	NA	BR	-19.9094	-48.3906	436	1980	ana	High
6870	BR_0002028	RIO UBERABA	NA	BR	-19.9094	-48.3911	NA	1980	ana	High
6871	BR_0002169	RIO SOROCABA	NA	BR	-23.3639	-47.615	NA	2010	ana	High
6874	US_0005630	COTTONWOOD RIVER	NEAR FLORENCE, KS	US	38.2361285	-96.8772436	375.36	1952.851	usgs	High
6880	BR_0002854	RIO CANOAS	RIO BONITO	BR	-27.7022	-49.84	900	2000	ana	High
6882	CA_0002363	HIGHWOOD RIVER	BELOW LITTLE BOW CANAL	CA	50.5856285095215	-113.869361877441	NA	1953.4	hydat	High
6883	BR_0002250	RIO BATALHA	NA	BR	-21.8833	-49.2333	NA	1960	ana	High
6885	CA_0002362	HIGHWOOD RIVER	AT HIGH RIVER	CA	50.5833282470703	-113.872222900391	NA	1980	hydat	High
6886	ZW_0000081	MWENEZI	JEKA BRIDGE G/W (63531028)	ZW	-20.8333	29.9333	NA	1929	grdb	High
6887	CA_0000412	LITTLE WHITE RIVER	NEAR BELLINGHAM	CA	46.3939514160156	-83.2829818725586	NA	1971.45	hydat	High
6890	CA_0000388	MAGPIE RIVER	NEAR WAWA	CA	48.022029876709	-84.8131713867188	NA	1954.09	hydat	High
6894	FI_0000095	KOUTAJOKI	OULANKAJOKI	FI	66.369	29.315	160	1986	grdb	High
6896	ES_0000433	SALOR	MEMBRIO	ES	39.5752777777778	-6.99583333333333	149	2058	afd	High
6897	BR_0001732	RIO DOURADOS	ABADIA DOS DOURADOS	BR	-18.4911	-47.4064	784	1950	ana	High
6899	US_0006422	NUECES RIVER	AT LAGUNA, TX	US	29.42856679	-99.997287	341.29	1908.821	usgs	High
6904	BR_0001903	RIO AIURUOCA	FAZENDA LARANJEIRAS	BR	-21.6889	-44.3508	905	1960	ana	High
6905	TZ_0000066	RUHUHU	MASIGIRA CONFLUENCE (55312211)	TZ	-9.9417	35.1917	NA	2007	grdb	High
6906	BR_0000894	NA	NA	BR	-19.9333	-43.8167	691	1970	ana	High
6909	CA_0001828	SAKAMI RIVER	EN AMONT DU LAC SAKAMI	CA	53.4361114501953	-76.1916732788086	NA	1860	hydat	High
6910	ES_0000403	ALBERCHE	SAN JUAN	ES	40.3722222222222	-4.30861111111111	520	1911	afd	High
6913	US_0002569	ELK RIVER	NEAR FRAMETOWN, WV	US	38.59232159	-80.8845474	236.17	1945.081	usgs	High
6914	US_0005858	WASHITA RIVER	NEAR CHEYENNE, OK	US	35.62643705	-99.6684386	579.43	1976.161	usgs	High
6917	IS_0000021	JOEKULSA A FJOELLUM	UPPTYPPINGAR	IS	65.03	-16.25	559	1966	grdb	High
6918	BR_0001299	NA	FAZENDA RIO DO SUL	BR	-17.2494	-39.6211	80	1980	ana	High
6919	BR_0001416	RIO CORRENTE GRANDE	PORTO SANTA RITA	BR	-18.9517	-42.3592	240	1970	ana	High
6930	CA_0001318	MAGOG RIVER	A LA CENTRALE DE ROCKFOREST	CA	45.3424987792969	-71.9936065673828	NA	1960	hydat	High
6932	CA_0001398	JACQUESCARTIER RIVER	EN AVAL DU PONT DU CHEMIN GOSFORD	CA	46.889720916748	-71.5272216796875	NA	2010	hydat	High
6933	CA_0003894	PORTER LAKE	OUTFLOW ABOVE TALTSON RIVER	CA	61.8833312988281	-107.697219848633	NA	2060	hydat	Medium
6934	BR_0000749	RIO IPOJUCA	CARUARU	BR	-8.3028	-36.0108	545	2000	ana	High
6935	BR_0000807	RIO ITAPECIRICA	PARI	BR	-20.1847	-44.8933	NA	1910	ana	High
6938	BR_0001510	RIO PARAITINGA	NA	BR	-23.2386	-45.3067	730	1950	ana	High
6939	BR_0001512	RIO PARAITINGA	NA	BR	-23.2394	-45.3053	734	1950	ana	High
6940	CI_0000032	KOUROUKELE	IRADOUGOU	CI	9.7	-7.79	398	2000	grdb	High
6941	PL_0000032	GWDA	PTUSZA	PL	53.367	16.8	80	2052	grdb	High
6942	ZA_0000209	TUGELA	KLEINE WATERVAL (27661726)	ZA	-28.7217	29.3756	1117	1869	grdb	High
6944	IT_0000136	CHIASCIO	TORGIANO	IT	43.02	12.43	NA	1956	ewa	High
6947	ZW_0000018	MUZVEVE	CLAW DAM U/S FLUME (63341087)	ZW	-18.45	29.9833	NA	1984	grdb	High
6948	US_0002265	LEAF RIVER	NEAR COLLINS, MS	US	31.70694444	-89.4069444	60.05	1924.361	usgs	High
6949	CA_0003521	DEER RIVER	NORTH OF BELCHER	CA	58.0135307312012	-94.1980590820312	NA	1890	hydat	High
6950	BR_0001511	RIO PARAITINGA	NA	BR	-23.2167	-45.3	740	1940	ana	High
6952	RU_0000307	VOKHMA	TIKHON	RU	59.38	46.67	190	1910	ewa	High
6954	RU_0000362	BOLSHOI KIZIL	VERKHNE-ABDRI	RU	52.95	58.77	570	1830	ewa	Medium
6955	IE_0000018	MOY	RAHANS	IE	54.1036	-9.157	NA	1974.8	grdb	High
6956	US_0003178	EMORY RIVER	AT OAKDALE, TN	US	35.9831307	-84.557992	231.87	1978.751	usgs	High
6958	CA_0002031	OLDMAN RIVER	NEAR COWLEY	CA	49.6063919067383	-114.045280456543	NA	1940	hydat	High
6961	BR_0000417	RIO BARREIRO	GENERAL CARNEIRO	BR	-15.7111	-52.7544	339	1950	ana	High
6962	BR_0002630	RIO POTINGA	NA	BR	-25.8667	-50.55	750	1930	ana	High
6963	CA_0003817	WHITEMUD RIVER	NEAR DIXONVILLE	CA	56.5109405517578	-117.660957336426	NA	2019.8	hydat	High
6965	DE_0000802	KOCHER	STEIN	DE	49.2583	9.2871	154	1929	grdb	High
6967	TH_0000057	PING RIVER	HIGHWAY BRIDGE	TH	18.3097	98.8264	NA	1970	game	High
6970	BR_0002579	NA	NA	BR	-25.5956	-49.4156	878.5	1940	ana	High
6973	CA_0003720	OSILINKA RIVER	NEAR END LAKE	CA	56.1269416809082	-124.801918029785	NA	1950	hydat	High
6974	US_0005552	L ARKANSAS RIVER	AT ALTA MILLS, KS	US	38.1122326	-97.591987	424.1	1763.782	usgs	Medium
6975	CA_0004159	HOMATHKO RIVER	BELOW NUDE CREEK	CA	51.374439239502	-124.761940002441	NA	1960	hydat	High
6979	US_0006129	RICHLAND CREEK	NEAR RICHLAND, TX	US	31.95071375	-96.42137	91.17	1901.051	usgs	High
6980	CA_0001123	PETITE NATION RIVER	DE LA A PORTAGEDELANATION	CA	45.6711082458496	-75.0355606079102	NA	1990	hydat	High
6983	BR_0000776	RIO QUITERIA	NA	BR	-9.3792	-36.2492	212	1970	ana	High
6984	US_0002511	LICKING RIVER	BELOW DILLON DAM NEAR DILLON FALLS OH	US	39.98840049	-82.0804166	213.36	1921.771	usgs	High
6986	ZA_0000183	MOOIRIVIER (TRIB. TUGELA)	SCHEEPERSDAAL (27661501)	ZA	-29.0331	30.36	857	1956	grdb	High
6987	BR_0003169	RIO TIJUCAS	SAO JOAO BATISTA	BR	-27.275	-48.85	14	1964	ana	High
6989	ES_0001193	JALON	CETINA AA. AB. DEZA	ES	41.2997222222222	-1.95555555555556	673	1905	afd	High
6990	BR_0002578	NA	NA	BR	-25.6006	-49.3981	878	1930	ana	High
6992	CA_0000093	BONAVENTURE RIVER	EN AMONT DU RUISSEAU CREUX	CA	48.1861114501953	-65.5586090087891	NA	1910	hydat	High
6993	GB_0000216	CLYDE (SCOTLAND)	DALDOWIE	GB	55.83	-4.12	NA	1903.1	grdb	High
6994	BR_0002200	RIO ATIBAIA	ITATIBA	BR	-22.9833	-46.8333	NA	1930	ana	High
6995	US_0006977	LITTLE COLORADO RIVER	ABOVE LYMAN LAKE NEAR ST. JOHNS, AZ	US	34.31448635	-109.362315	1831.87	1823.352	usgs	High
6996	TR_0000022	KOEPRUE	BESKONAK	TR	37.144	31.199	117	1942	grdb	High
6998	BR_0002249	RIO BATALHA	NA	BR	-21.8906	-49.2389	410	1900	ana	High
7001	BR_0001663	RIO NOVO	NA	BR	-21.4667	-42.8	NA	1910	ana	High
7002	CA_0002945	SWAN RIVER	NEAR NORQUAY	CA	51.9977798461914	-102.073890686035	NA	1920	hydat	High
7003	CA_0001125	PETITE NATION RIVER	DE LA A PORTAGEDELANATION	CA	45.6713905334473	-75.0205612182617	NA	1990	hydat	High
7005	TH_0000070	PING RIVER	BAN SANMAHAPHON	TH	19.1208	98.9475	NA	1902	game	High
7010	IN_0000143	Krishna	Jeewangi	IN	17.2542	77.4644	426	1920	wris	High
7011	RU_0000455	ZOLOTITSA	VERKHNAYA ZOLOTITSA	RU	65.67	40.42	-0.22	1840	arcticnet	High
7012	US_0006255	SAN GABRIEL RIVER	AT LANEPORT, TX	US	30.69436146	-97.2788849	125.76	1911.411	usgs	High
7013	CA_0003982	KISPIOX RIVER	NEAR HAZELTON	CA	55.4338493347168	-127.716163635254	NA	1880	hydat	High
7015	BR_0001070	RIO PRETO	VEREDA	BR	-11.0914	-45.9086	NA	1900	ana	High
7017	FR_0000522	DRONNE	BONNES	FR	45.24	0.15	36.94	2010	ewa	High
7019	CA_0005839	WEST KETTLE RIVER	AT WESTBRIDGE	CA	49.1698112487793	-118.975059509277	NA	1890	hydat	High
7020	CA_0003051	SHELL RIVER	AT ASESSIPPI	CA	50.9472198486328	-101.316673278809	NA	1980	hydat	High
7023	CA_0003054	SHELL RIVER	NEAR INGLIS	CA	50.9633407592773	-101.318771362305	NA	1970	hydat	High
7026	US_0000466	WALLKILL RIVER	AT GARDINER NY	US	41.6861111	-74.16527778	56.6	1800.042	usgs	High
7027	BR_0000681	NA	POMBINHO	BR	-7.4364	-38.3189	NA	1920	ana	High
7030	CA_0003994	MORICE RIVER	NEAR HOUSTON	CA	54.116828918457	-127.426582336426	NA	1900	hydat	High
7032	RU_0000318	ZHIZDRA	DUBROVKA	RU	53.88	35.08	210	1900	ewa	High
7033	CA_0002903	BALLANTYNE RIVER	ABOVE BALLANTYNE BAY	CA	54.5611114501953	-103.941673278809	NA	1870	hydat	High
7034	DE_0000643	LIPPE	KESSELER 3	DE	51.663	8.0894	67.86	2005	grdb	Medium
7036	US_0004737	PLATTE CREEK	NEAR PLATTE, SD	US	43.3272192	-98.9706446	417.58	1934.721	usgs	High
7037	BR_0001056	RIO DE ONDAS	LIMOEIRO	BR	-12.2872	-45.5494	NA	1900	ana	High
7042	CA_0004433	COTTONWOOD RIVER	NEAR CINEMA	CA	53.1552810668945	-122.476112365723	NA	1910	hydat	High
7043	IN_0000070	Godavari	Ambabal	IN	19.2967	81.7889	543	1968	wris	High
7046	CA_0002513	NORTH SASKATCHEWAN RIVER	AT WHIRLPOOL POINT	CA	52.0011901855469	-116.470932006836	NA	1923.2	hydat	High
7051	CA_0003895	PORTER LAKE	OUTFLOW	CA	61.8158302307129	-107.869720458984	NA	2050	hydat	Medium
7052	US_0007077	SAN PEDRO RIVER	AT PALOMINAS, AZ.	US	31.38010095	-110.1111882	1276.4	1908.821	usgs	High
7054	BR_0001283	NA	FAZENDA BOA SORTE JUSANTE	BR	-16.6222	-41.0281	300	1900	ana	High
7056	BR_0002136	NA	PENHA	BR	-23.5	-46.55	NA	1910	ana	High
7058	ES_0000635	RUECAS	HERNAN CORTES	ES	39.0333333333333	-5.91	249	1715	afd	Medium
7061	FR_0000523	DRONNE	AUBETERRE	FR	45.27	0.18	41.91	1990	ewa	Medium
7064	RU_0000366	BOLSHOI IK	MRAKOVO	RU	52.72	56.63	490	1870	ewa	High
7065	CA_0002527	RAM RIVER	NEAR THE MOUTH	CA	52.3685913085938	-115.422180175781	NA	1853.6	hydat	High
7066	CA_0006020	MARTIN RIVER	AT HIGHWAY NO 1	CA	61.8939399719238	-121.611831665039	NA	2050	hydat	Medium
7068	CA_0000467	STURGEON RIVER	AT LOWER GOOSE FALLS	CA	46.936939239502	-80.4313888549805	NA	1800	hydat	High
7069	ES_0000411	ALAGON	GUIJO DE GRANADILLA	ES	40.1930555555556	-6.13972222222222	NA	1871	afd	High
7072	FR_0000888	ESSONNE	BALLANCOURT	FR	48.54	2.37	47.78	1870	ewa	High
7073	BR_0001282	NA	FAZENDA BOA SORTE	BR	-16.65	-41.0167	NA	1890	ana	High
7074	CA_0000913	CROWE RIVER	AT MARMORA	CA	44.4815711975098	-77.6847991943359	NA	1934.69	hydat	High
7075	CA_0001720	TERRA NOVA RIVER	AT GLOVERTOWN	CA	48.6627502441406	-54.015251159668	NA	2000	hydat	Medium
7078	CA_0003650	SWAN RIVER	NEAR KINUSO	CA	55.3155403137207	-115.417167663574	NA	1900.4	hydat	High
7080	BR_0000938	RIO ESCURO	NA	BR	-17.6133	-46.8586	560	1870	ana	High
7081	BR_0003302	RIO PIRATINI	NA	BR	-31.7167	-52.9	90	1870	ana	High
7083	CA_0006226	BATTLE CREEK	NEAR CONSUL	CA	49.2866706848145	-109.524169921875	NA	1850	hydat	High
7084	IN_0000090	Godavari	Rajoli	IN	20.1936	79.6656	180.62	1900	wris	High
7085	HU_0000040	CRASNA	AGERDOMAJOR	HU	47.7667	22.4333	111	1974	grdb	Medium
7087	IN_0000041	Tapi	Morane	IN	20.9092	74.7011	265	1933	wris	High
7088	CA_0001809	NA	GIARD RIVER	CA	52.7705612182617	-76.1602783203125	NA	1970	hydat	High
7089	CA_0002437	MEDICINE RIVER	NEAR ECKVILLE	CA	52.3195610046387	-114.344169616699	NA	1915.9	hydat	High
7093	CA_0001783	BELL RIVER	A SENNETERRE2	CA	48.351390838623	-77.2733306884766	NA	2010	hydat	Medium
7095	CA_0000607	MAITLAND RIVER	NEAR DONNYBROOK	CA	43.8250007629395	-81.4905624389648	NA	1760	hydat	Medium
7096	FR_0000335	ISLE	CHARRIERAS	FR	45.2	0.8	88.21	1860	ewa	High
7097	CA_0002608	BATTLE RIVER	NEAR PONOKA	CA	52.6632499694824	-113.581413269043	NA	1821.5	hydat	High
7098	BR_0000794	RIO BAMBUI	ESTEIOS	BR	-19.9667	-45.7333	612	1860	ana	High
7099	RU_0000269	TUZLOV	NESVETAI	RU	47.47	39.67	120	1910	ewa	High
7100	FI_0000088	OULUJOKI	LAKE LENTUA OUTLET	FI	64.19	29.584	165	2045	grdb	Medium
7101	ES_0000412	ALAGON	GABRIEL Y GALAN	ES	40.2222222222222	-6.13111111111111	321	1848	afd	High
7103	CA_0000493	MAGNETAWAN RIVER	AT MAPLE ISLAND	CA	45.707218170166	-79.8772201538086	NA	1850	hydat	High
7104	CN_0000067	MA LONG HE	XIAO LONG TAN	CN	24.51666667	101.5166667	NA	1807	chdp	High
7105	CN_0000069	XING XIU JIANG	DONG HU CUN	CN	24.51666667	101.5166667	NA	1807	chdp	High
7106	GB_0000010	DEE (SCOTLAND)	PARK	GB	57.0753	-2.3348	22.6	1844	grdb	High
7108	GB_0000213	MOURNE	DRUMNABUOY HOUSE	GB	54.816	-7.456	7	1843.8	grdb	High
7109	FR_0000769	GARTEMPE	MONTMORILLON	FR	46.42	0.87	85.55	1870	ewa	High
7110	DE_0000548	REDNITZ	NEUMUEHLE	DE	49.44	10.99	290.22	1845	ewa	High
7114	US_0004975	MUD CREEK	NEAR SWEETWATER, NE	US	41.03805556	-98.9927778	613.78	1696.442	usgs	Medium
7118	ZA_0000167	MKOMAZI	LOT93.1821 CAMDEN (27662505)	ZA	-29.7436	29.9047	921	1744	grdb	Medium
7119	CA_0001786	BELL RIVER	A SENNETERRE1	CA	48.3188896179199	-77.3038864135742	NA	1990	hydat	Medium
7121	ES_0000909	MIJARES	TOGA	ES	40.0422222222222	-0.358888888888889	274	1836	afd	High
7123	CA_0001197	CROCHE RIVER	A LA CROCHE	CA	47.584171295166	-72.7430572509766	NA	1850	hydat	High
7125	BR_0001795	NA	NA	BR	-15.8186	-47.7047	NA	1850	ana	High
7126	BR_0001972	RIO VERDE	NA	BR	-21.8872	-45.0792	843	1840	ana	High
7127	SI_0000018	SAVINJA	VELIKO SIRJE I	SI	46.0919	15.1924	189.96	1842	grdb	High
7128	IN_0000076	Godavari	Tumnar	IN	19.0122	81.2325	330	1700	wris	Medium
7130	FR_0001310	VAR	MALAUSSENE (LA MESCLA)	FR	43.9076	7.1953	222.19	1830	grdb	High
7131	US_0002044	CHOCTAWHATCHEE RIVER	NEAR NEWTON, AL.	US	31.3429492	-85.6104912	42.23	1776.732	usgs	High
7132	TH_0000133	NAM MAE FANG	BAN THA MAI LIAM	TH	20.02	99.3583	445	1800	grdb	High
7133	US_0002215	LUXAPALLILA CREEK	NEAR COLUMBUS, MS	US	33.51416667	-88.3952778	43.35	1851.841	usgs	High
7136	US_0005896	CLEAR BOGGY CREEK	NEAR CANEY, OK	US	34.25259007	-96.2055454	147.85	1846.662	usgs	High
7137	BR_0002894	NA	ABELARDO LUZ	BR	-26.5603	-52.3264	760	1840	ana	High
7140	CA_0001981	MUSWABIK RIVER	AT OUTLET OF MUSWABIK LAKE	CA	51.5255584716797	-85.0702819824219	NA	1890	hydat	High
7142	CA_0005622	ELK RIVER	NEAR NATAL	CA	49.8656196594238	-114.868682861328	NA	1840	hydat	High
7143	CA_0002058	OLDMAN RIVER	AT RANGE ROAD NO 13A	CA	49.7276916503906	-114.086486816406	NA	1834.1	hydat	High
7144	BR_0000576	RIO MARAVILHA	MARAVILHA BR-230	BR	-7.4742	-46.0219	NA	1870	ana	High
7148	DE_0000680	JAGST	UNTERGRIESHEIM	DE	49.2686	9.2199	148.69	1825	grdb	High
7151	FR_0001296	AUDE	CARCASSONNE (PONT NEUF)	FR	43.2133	2.3601	155.1	1770	grdb	High
7152	CA_0000117	NEPISIGUIT RIVER	AT NEPISIGUIT FALLS	CA	47.4066696166992	-65.7949981689453	NA	1840	hydat	High
7155	RU_0000305	OBNORA	SHARNA	RU	58.35	40.8	160	1800	ewa	High
7156	SK_0000032	HRON	BANSKA BYSTRICA	SK	48.73	19.13	334	1766	grdb	High
7157	CA_0005638	SIMILKAMEEN RIVER	AT PRINCETON	CA	49.4597015380859	-120.503532409668	NA	1810	hydat	High
7158	US_0004995	NORTH FORK ELKHORN RIVER	NEAR PIERCE, NEBR.	US	42.1485	-97.4785278	470.28	1737.882	usgs	High
7160	US_0005900	KIAMICHI RIVER	NEAR CLAYTON, OK	US	34.5748229	-95.3408025	158.5	1810.402	usgs	High
7161	US_0000305	CHICOPEE RIVER	AT INDIAN ORCHARD, MA	US	42.16064906	-72.5139756	38.1	1784.502	usgs	High
7162	MW_0000020	LILONGWE	LILONGWE - OLD TOWN BRIDGE (65312805)	MW	-13.9889	33.7728	1030	1891	grdb	High
7163	BR_0003249	RIO CARREIRO	PASSO CARREIRO	BR	-28.8489	-51.8325	260	1820	ana	High
7165	ES_0000617	RUECAS	RENA	ES	39.0455555555556	-5.80305555555555	250	1810	afd	High
7168	US_0005930	LITTLE CYPRESS BAYOU	NEAR JEFFERSON, TX	US	32.71291998	-94.3460265	53.22	1748.242	usgs	High
7171	TH_0000051	PING RIVER	BAN MAE KHAN	TH	18.5269	98.8617	NA	1777	game	High
7172	CA_0001385	SAINTEANNE RIVER	PRES DE SAINTCASIMIR	CA	46.6769409179688	-72.0963897705078	NA	1810	hydat	High
7173	BR_0001906	RIO CAPIVARI	ITUMIRIM	BR	-21.3211	-44.8719	807	1820	ana	High
7174	CA_0000402	GOULAIS RIVER	NEAR KIRBYS CORNER	CA	46.7173881530762	-84.284782409668	NA	1826	hydat	High
7175	BR_0002494	RIO AMAMBAI	PONTE RIO AMAMBAI	BR	-22.9428	-55.2211	395	1830	ana	High
7181	FR_0000780	LEYRE	SALLES	FR	44.5472	-0.872	74.3	1650	grdb	Medium
7182	US_0006419	MISSION RIVER	AT REFUGIO, TX	US	28.29195088	-97.2791593	0.3	1787.092	usgs	High
7184	BR_0000816	RIO LAMBARI	NA	BR	-19.7531	-45.1175	648.5	1820	ana	High
7186	US_0005114	SALINE RIVER	NEAR WAKEENEY, KS	US	39.1061185	-99.8701212	675.89	1802.632	usgs	High
7187	CA_0001386	SAINTEANNE RIVER	A LA CENTRALE DE SAINTALBAN	CA	46.7069396972656	-72.0833282470703	NA	1800	hydat	High
7189	CA_0001497	MITIS RIVER	A LA CENTRALE DE PRICE	CA	48.621940612793	-68.1374969482422	NA	1800	hydat	High
7190	SK_0000035	SAJO	LENARTOVCE	SK	48.3055	20.314	150	1830	grdb	High
7193	BR_0001679	RIO GRANDE	PIMENTEL	BR	-21.77	-41.9383	80	1810	ana	High
7195	CA_0004343	NIMPKISH RIVER	NEAR ENGLEWOOD	CA	50.5227813720703	-127.014167785645	NA	1760	hydat	High
7196	NO_0000103	LAGEN	ROSTEN	NO	61.858567	9.405153	319	1755	ewa	High
7197	ZA_0000254	MOKOLORIVIER	ZANDRIVIER (27546002)	ZA	-24.2828	28.0897	1142	1801	grdb	High
7198	US_0005099	NF SMOKY HILL RIVER	NEAR MCALLASTER, KS	US	39.01787498	-101.3479109	935.83	1683.492	usgs	Medium
7200	BR_0000485	RIO TARTARUGAL GRANDE	TARTARUGAL GRANDE	BR	1.3978	-50.925	NA	1810	ana	High
7204	US_0003630	GRAND RIVER	NEAR PAINESVILLE OH	US	41.7189339	-81.2278789	181.51	1774.142	usgs	High
7205	BR_0002968	RIO CACEQUI	CACEQUI	BR	-29.9	-54.8333	100	1810	ana	High
7206	BR_0001028	NA	NA	BR	-13.5186	-45.4003	NA	1820	ana	High
7207	US_0002236	LOCUST FORK	AT WARRIOR, ALABAMA	US	33.80843478	-86.8011058	NA	1831.122	usgs	High
7208	CA_0005653	TULAMEEN RIVER	AT PRINCETON	CA	49.4577102661133	-120.518569946289	NA	1780	hydat	High
7209	RU_0000320	ISSA	PAIEVO	RU	54.02	44.22	220	1790	ewa	High
7213	US_0002396	CHEAT RIVER	NEAR PARSONS, WV	US	39.12155556	-79.6755278	484.62	1869.971	usgs	High
7214	FR_0000604	ARROUX	ETANG SUR ARROUX (TACOT)	FR	46.85	4.19	NA	1800	ewa	High
7216	IN_0000231	Baitarni	Champua	IN	22.0658	85.6733	367	1710	wris	High
7218	BR_0000380	RIO MANOEL ALVES	PORTO ALEGRE	BR	-11.6114	-47.0447	383	1780	ana	High
7222	BR_0000436	RIO TESOURAS	PONTE RIO TESOURAS	BR	-14.7167	-50.5	NA	1800	ana	High
7223	DE_0000419	HUNT	HUNTLOSEN	DE	53	8.31	12.41	1699	ewa	High
7225	FR_0001044	RISLE	PONT AUTHOU	FR	49.24	0.69	NA	1910	ewa	Medium
7226	US_0002285	BLACK CREEK	NEAR WIGGINS, MS	US	30.85333333	-88.9136111	14.92	1815.582	usgs	High
7227	CA_0002434	BLINDMAN RIVER	NEAR BLACKFALDS	CA	52.3540191650391	-113.794723510742	NA	1795.9	hydat	High
7230	FR_0001130	BLIES	BLIESBRUCK	FR	49.12	7.18	NA	1930	ewa	Medium
7232	CA_0005906	BIG CREEK	NEAR THE MOUTH	CA	62.5678291320801	-137.009674072266	NA	1800	hydat	High
7233	RU_0000323	SEREZHA	LESUNOVO	RU	55.67	43.12	160	1810	ewa	High
7234	US_0003169	POWELL RIVER	NEAR ARTHUR, TN	US	36.54214606	-83.6303312	318.17	1774.142	usgs	High
7236	FR_0000423	TRUYERE	GRANDVAL	FR	44.92	3.07	NA	1780	ewa	High
7238	TH_0000012	NAN RIVER	BAN WANG NOK	TH	16.8431	100.5222	NA	1861	game	High
7242	US_0005843	EAST CACHE CREEK	NEAR WALTERS, OK	US	34.36230747	-98.2825468	285.97	1797.452	usgs	High
7244	CA_0001054	NA	NOIRE RIVER	CA	46.2836112976074	-77.0777816772461	NA	1800	hydat	High
7246	US_0002103	CONASAUGA RIVER	AT TILTON, GA	US	34.6667494	-84.9282765	189.67	1779.322	usgs	High
7247	DE_0000353	BLIES	REINHEIM	DE	49.14	7.18	206.63	1798	ewa	High
7249	BR_0001654	RIO POMBA	PCH IVAN BOTELHO II JUSANTE.	BR	-21.3375	-42.9658	NA	1790	ana	High
7253	BR_0001664	RIO NOVO	NA	BR	-21.4714	-42.8297	212	1770	ana	High
7254	CA_0001555	SHIPSHAW RIVER	AU RESERVOIR ONATCHIWAY	CA	48.8902816772461	-71.0388870239258	NA	1740	hydat	High
7255	CA_0000968	BLANCHE RIVER	ABOVE ENGLEHART	CA	47.8891410827637	-79.8793106079102	NA	1782.25	hydat	High
7256	ZM_0000024	MAGOYE	CHIMBUMBU FARM	ZM	-15.9666	27.6	NA	1865	grdb	High
7257	BR_0001633	RIO PRETO	RIO PRETO	BR	-22.0861	-43.82	426	1800	ana	High
7258	BR_0000503	RIO PIRIA	SETE ILHAS	BR	-1.8581	-46.7089	NA	1800	ana	High
7260	BJ_0000001	COUFFO	LANHOUNTA	BJ	7.1	1.88	NA	1680	grdb	Medium
7264	DE_0000430	HASE	BUNNEN	DE	52.72	7.84	20.62	1769	grdb	High
7267	ZA_0000125	VOELRIVIER	RIET VLEY (27682302)	ZA	-33.0003	25.1642	312	1742	grdb	High
7268	ES_0000062	NAVIA	SALIME (E.)	ES	43.2375	-6.84611111111111	142	1766	afd	High
7269	CA_0005491	SLOCAN RIVER	AT SLOCAN CITY	CA	49.7688903808594	-117.47306060791	NA	1660	hydat	Medium
7270	CA_0003752	BLUEBERRY RIVER	BELOW AITKEN CREEK	CA	56.6776390075684	-121.222328186035	NA	1770	hydat	High
7272	BR_0000465	NA	NA	BR	-7.8764	-48.8789	167	1790	ana	High
7273	CA_0000934	MOIRA RIVER	NEAR TWEED	CA	44.4884605407715	-77.3197326660156	NA	1762.67	hydat	High
7274	CA_0000936	MOIRA RIVER	AT TWEED	CA	44.4886093139648	-77.3197174072266	NA	1770	hydat	High
7275	BR_0003264	NA	NA	BR	-29.7708	-50.0844	2	1720	ana	High
7277	US_0006423	W NUECES RIVER	NEAR BRACKETTVILLE, TX	US	29.48108333	-100.2391667	404.41	1797.452	usgs	High
7279	FR_0000187	OGNON	CHEVIGNEY	FR	47.3	5.82	NA	1710	ewa	High
7280	AR_0000027	TUPUNGATO	PUNTA DE VACAS	AR	-32.85	-69.77	2430	1800	grdb	High
7284	NO_0000109	FLISA	KNAPPOM	NO	60.63	12.03	164	1625	grdb	Medium
7286	CA_0005101	KICKING HORSE RIVER	AT GOLDEN	CA	51.3011817932129	-116.972068786621	NA	1850	hydat	High
7287	BR_0001298	NA	CACHOEIRA GRANDE	BR	-17.2528	-39.7742	NA	1800	ana	High
7289	TH_0000126	PAI	BAN PAENG (DAM SITE)	TH	19.23	98.34	424	1750	grdb	High
7290	CN_0000009	NAN BI HE	MENG SHENG	CN	23.38333333	99.41666667	NA	1800	chdp	High
7292	ES_0000575	ARDILA	OLIVAR	ES	38.2316666666667	-6.88416666666667	208	1800	afd	High
7295	ES_0000657	JABALON	ARAGONES, EL	ES	38.7663888888889	-3.73388888888889	630	1700	afd	High
7296	ES_0001034	NOGUERA RIBAGORZANA	PIÑANA	ES	41.8780555555556	0.579722222222222	300	1757	afd	High
7298	BR_0002724	RIO CAPANEMA	PONTE DO CAPANEMA	BR	-25.77	-53.6114	320	1730	ana	High
7299	FR_0000844	LYS	ARMENTIERES	FR	50.69	2.9	NA	1690	ewa	High
7301	CA_0001319	MAGOG RIVER	A MAGOG	CA	45.2633285522461	-72.1449966430664	NA	1770	hydat	High
7302	US_0003064	HARPETH RIVER	NEAR KINGSTON SPRINGS, TN	US	36.1220032	-87.09889379	136.26	1727.522	usgs	High
7303	IN_0000092	Godavari	Salebardi	IN	20.9122	79.9264	224.3	1800	wris	High
7305	BR_0001623	RIO DO PEIXE	NA	BR	-21.8692	-43.5556	642	1720	ana	High
7307	BR_0003225	RIO DAS ANTAS	PASSO DO GABRIEL	BR	-28.8056	-50.495	580	1820	ana	High
7308	CN_0000027	NAN PENG HE	FENG WEI BA	CN	23.85	98.98333333	NA	1694	chdp	High
7309	RU_0000257	PODGORNAYA	KALATCH	RU	50.42	41.05	180	1790	ewa	High
7311	BR_0003067	NA	NA	BR	-24.3092	-47.5767	15	1760	ana	High
7312	CA_0001431	MALBAIE RIVER	A CLERMONT	CA	47.6941719055176	-70.2169418334961	NA	1700	hydat	High
7314	CA_0000384	MAGPIE RIVER	AT STEEP HILL FALLS	CA	48.0677795410156	-84.7405624389648	NA	1640	hydat	Medium
7315	BR_0000408	NA	NA	BR	-17.2208	-53.1631	622	1760	ana	High
7316	FR_0001120	SARRE	SARREINSMING	FR	49.09	7.11	198.92	1760	ewa	High
7317	RU_0000219	KODINA	KODINO	RU	63.72	39.62	25	1800	arcticnet	High
7320	US_0006288	SPRING CREEK	ABOVE TWIN BUTTES RESERVOIR NEAR SAN ANGELO, TX	US	31.3309973	-100.600931	591.32	1701.622	usgs	High
7321	ES_0000300	ARLANZON	VILLAVIEJA	ES	42.2683333333333	-3.88972222222222	805	1702	afd	High
7323	CA_0002138	WATERTON RIVER	NEAR STAND OFF	CA	49.5019416809082	-113.326110839844	NA	1730	hydat	High
7327	CR_0000012	GRANDE DE TARCOLES	ALUMBRE	CR	9.9	-84.47	101	1745	grdb	High
7330	MY_0000004	MUDA	JENIANG	MY	5.8	100.62	30	1710	grdb	High
7332	US_0006074	W FK TRINITY RIVER	NEAR JACKSBORO, TX	US	33.29177926	-98.0805979	264.96	1768.962	usgs	High
7333	IN_0000032	Narmada	Chhidgaon	IN	22.4058	77.3081	NA	1729	wris	High
7334	FR_0000862	MEUSE	CHALAINES	FR	48.6	5.68	NA	1720	ewa	High
7337	CA_0005976	GRAYLING RIVER	NEAR THE MOUTH	CA	59.3747215270996	-125.06861114502	NA	1780	hydat	High
7339	RU_0000363	TANALYK	SAMARSKOJE	RU	52.03	58.15	482	1750	ewa	High
7341	RU_0000235	JENA	JENA	RU	67.6	31.17	310	1620	ewa	High
7347	BR_0001632	RIO PRETO	PARAPEUNA	BR	-22.0833	-43.8333	423	1740	ana	High
7350	CA_0001302	SAINTFRANCOIS RIVER	AU RESERVOIR AYLMER A WEEDON	CA	45.7602806091309	-71.4063873291016	NA	1710	hydat	High
7351	CA_0001323	SAINTFRANCOIS RIVER	A 01 KM EN AVAL DU BARRAGE AYLMER	CA	45.7597198486328	-71.4069366455078	NA	1730	hydat	High
7357	ZM_0000010	MUTANDA	MUTANDA MISSION (60334501)	ZM	-12.4	26.25	NA	1780	grdb	High
7360	BR_0000872	NA	FAZENDA BOM JARDIM	BR	-18.95	-45.7	NA	1730	ana	High
7362	CA_0000605	MAITLAND RIVER	BELOW WINGHAM	CA	43.8867492675781	-81.3264389038086	NA	1644.42	hydat	High
7364	US_0001012	CACAPON RIVER	NEAR GREAT CACAPON, WV	US	39.5823158	-78.3097312	139.17	1748.242	usgs	High
7365	GB_0000217	TUMMEL	BALLINLUIG	GB	56.63	-3.65	75	1717	grdb	High
7366	BR_0002705	RIO SANTANA	BALSA DO SANTANA	BR	-25.9206	-52.8522	450	1720	ana	High
7367	BR_0001837	RIO MEIA PONTE	NA	BR	-16.6136	-49.2797	NA	1740	ana	High
7369	ES_0001010	ARGA	ECHAURI	ES	42.7919444444444	-1.78861111111111	376	1756	afd	High
7371	GB_0000182	CLYDE (SCOTLAND)	BLAIRSTONE	GB	55.797	-4.068	17.6	1704.2	grdb	High
7372	CH_0000089	THUR (CH)	ANDELFINGEN	CH	47.5965	8.682	402.75	1696	grdb	High
7373	MX_0000006	RIO PILON	MONTEMORELOS	MX	25.1792	-99.8333	424	1691	grdb	High
7380	BR_0003014	NA	NA	BR	-24.9303	-49.4831	398	1700	ana	High
7381	IE_0000033	BOYNE	NAVAN WEIR	IE	53.6434	-6.6716	NA	1683.8	grdb	High
7382	RU_0000262	SEVERSKY DONETS	DALNIJE PES	RU	50.53	36.63	190	1700	ewa	High
7384	IN_0000303	Godavari	Kotta	IN	18.7767	82.5072	NA	1710	wris	High
7387	CA_0005945	EAGLE RIVER	AT DEMPSTER HIGHWAY BRIDGE	CA	66.4434661865234	-136.709213256836	NA	1720	hydat	High
7389	NO_0000180	KLARA	FEMUNDSENDEN	NO	61.919961	11.940043	662	1769	ewa	High
7391	CA_0005386	LARDEAU RIVER	AT MARBLEHEAD	CA	50.2628707885742	-116.968292236328	NA	1640	hydat	High
7392	BR_0001262	RIO ITAMARANDIBA	PONTE MG-214	BR	-17.6397	-42.6789	650	1720	ana	High
7393	BR_0000577	RIO PEQUENO	BALSINHAS BR-324	BR	-7.5356	-45.8025	NA	1710	ana	High
7395	IN_0000047	Tapi	Malkheda	IN	21.0564	75.0706	NA	1830	wris	Medium
7396	US_0005811	BAYOU PIERRE	NEAR WILLOWS, MS	US	32.0186111	-90.8783333	25.09	1693.852	usgs	High
7398	FR_0000302	INDRE	SAINT-CYRAN-DU-JAMBOT	FR	47.0159	1.1266	138.05	1712	grdb	High
7399	US_0003103	PIGEON RIVER	AT NEWPORT, TN	US	35.96065267	-83.1743237	316.62	1724.932	usgs	High
7400	BR_0003183	NA	NA	BR	-28.3258	-49.1792	40	1690	ana	High
7401	RU_0000310	BOLSHAYA KAKSHA	SIAVA	RU	58.02	46.35	130	1670	ewa	High
7405	FR_0000880	CHIERS	CHAUVENCY LE CHATEAU	FR	49.52	5.31	NA	1700	ewa	High
7406	BR_0000414	RIO DO PEIXE	RIO DO PEIXE	BR	-16.7186	-52.3322	NA	1770	ana	High
7408	CA_0004406	FRASER RIVER	AT RED PASS	CA	52.9862785339355	-119.00666809082	NA	1710	hydat	High
7410	BR_0002317	RIO JAGUARIAIVA	NA	BR	-23.9767	-49.5958	490	1690	ana	High
7411	BR_0001835	RIO PIEDADE	PONTE RIO PIEDADE	BR	-18.55	-49.1667	499	1710	ana	High
7418	DE_0000758	LECH	LECHBRUECK	DE	47.6966	10.799	721	1713.9	grdb	High
7420	ES_0000335	DUERO	TARDAJOS DE DUERO	ES	41.6697222222222	-2.39027777777778	977	1717	afd	High
7424	US_0001005	SOUTH BRANCH POTOMAC RIVER	NEAR PETERSBURG, WV	US	38.99122107	-79.17587059	295.01	1686.082	usgs	High
7435	US_0005850	BEAVER CREEK	NEAR ELECTRA, TX	US	33.90592785	-98.9050666	302.15	1688.672	usgs	High
7436	CA_0005957	BLUE RIVER	NEAR THE MOUTH	CA	59.7583312988281	-129.127777099609	NA	1700	hydat	High
7437	CR_0000029	REVENTAZON	PASCUA	CR	10.02	-83.6	247	1673	grdb	High
7438	BR_0001481	RIO JUCU	FAZENDA JUCURUABA	BR	-20.415	-40.4853	80	1690	ana	High
7439	CA_0000724	NORTH THAMES RIVER	AT LONDON	CA	43.0072212219238	-81.2683334350586	NA	1700	hydat	High
7441	RU_0000331	LEMEZA	NIZHNIJE LEMEZY	RU	54.75	57	429	1680	ewa	High
7442	GB_0000218	TUMMEL	PITLOCHRY	GB	56.7	-3.72	NA	1670	grdb	High
7444	BR_0000687	RIO ESPINHARAS	PATOS	BR	-7.0228	-37.27	250	1650	ana	High
7446	BR_0001077	RIO VERDE	FAZENDA CABACEIRAS	BR	-11.5	-42.3333	520	1690	ana	High
7448	BR_0002502	RIO PIQUIRI	NA	BR	-24.9831	-52.2831	550	1690	ana	High
7451	US_0001897	ALAPAHA RIVER	NEAR ALAPAHA, GA	US	31.3843626	-83.1923758	63.28	1717.162	usgs	High
7452	CA_0001928	NA	EAST METCHIN RIVER	CA	53.4348297119141	-63.233829498291	NA	1750	hydat	High
7453	US_0006411	CIBOLO CREEK	AT SUTHERLAND SPRINGS, TX	US	29.2797222	-98.0533333	128.06	1722.342	usgs	High
7455	CA_0004936	BRIDGE RIVER	NEAR GOLD BRIDGE	CA	50.8511085510254	-122.845832824707	NA	1650	hydat	High
7457	CO_0000038	ORTEGUAZA	LARANDIA	CO	1.47	-75.48	290	1578	grdb	Medium
7458	CA_0001507	MATANE RIVER	A MATANE	CA	48.8183288574219	-67.5397186279297	NA	1680	hydat	High
7459	BR_0002791	RIO PONTE DE PEDRA	PONTE DE PEDRA	BR	-16.7161	-54.7461	374	1750	ana	High
7462	ZA_0000220	SWART-MFOLOZI	NATIVE RES. 12 (27650206)	ZA	-28.0694	31.5494	236	1659	grdb	High
7465	BR_0001419	NA	FAZENDA BRETZ	BR	-18.9347	-42.0831	NA	1710	ana	High
7469	BR_0001290	NA	DUAS BARRAS	BR	-16.3667	-39.8333	NA	1650	ana	High
7470	CA_0000954	KINOJEVIS RIVER	EN AVAL DE LA RIVER VILLEMONTEL	CA	48.4558296203613	-78.3611068725586	NA	1680	hydat	High
7471	PA_0000011	CHANGUINOLA	VALLE DEL RISCO	PA	9.2833	-82.5333	47	1680	grdb	High
7474	CA_0003678	DESCHARME RIVER	BELOW DUPRE LAKE	CA	57.1230583190918	-109.22721862793	NA	1690	hydat	High
7475	US_0001611	BRIER CREEK	AT MILLHAVEN, GA	US	32.93349199	-81.6512217	29.22	1673.132	usgs	High
7480	DE_0000660	LAHN	MARBURG	DE	50.7987	8.7645	166.38	1667	grdb	High
7483	US_0008473	PRIEST RIVER	NEAR COOLIN ID	US	48.45186127	-116.9004834	712.7	1582.483	usgs	High
7484	ZA_0000003	RENOSTERRIVIER	BONEKRAAL (27814011)	ZA	-31.8153	20.5781	1140	1679	grdb	High
7485	SI_0000010	SAVINJA	LASKO	SI	46.1539	15.2336	215.02	1663.6	ewa	High
7490	BR_0002132	NA	ERMELINDO MATARAZZO	BR	-23.4833	-46.4667	NA	1690	ana	High
7491	BR_0002134	NA	CUMBICA	BR	-23.4833	-46.4667	NA	1690	ana	High
7492	BR_0000463	RIO PIRANHAS	PONTE RIO PIRANHAS	BR	-9.1839	-49.3775	163	1660	ana	High
7493	US_0008672	SF BOISE RIVER	NEAR FEATHERVILLE ID	US	43.4958333	-115.3080556	1285.83	1644.642	usgs	High
7495	ZW_0000063	NGEZI (TRIB. RUNDE)	MBERENGWA ROAD BRIDGE (63423528)	ZW	-20.3667	29.9	NA	1672	grdb	High
7496	CA_0000090	CASCAPEDIA RIVER	EN AVAL DU RUISSEAU BERRY	CA	48.6283302307129	-66.1680603027344	NA	1680	hydat	High
7499	FR_0000244	ARVE	ARTHAZ-PONT-NOTRE-DAME	FR	46.1497	6.2704	458.98	1664	grdb	High
7500	BR_0001652	RIO POMBA	GUARANI RV	BR	-21.3667	-43.05	393	1660	ana	High
7501	BR_0002031	RIO PARDO	UHE CACONDE CACHOEIRA DO CARMO	BR	-21.7217	-46.4556	981	1660	ana	High
7502	BR_0000802	NA	PONTE DO VILELA	BR	-20.4333	-44.6	786	1650	ana	High
7503	IN_0000119	Krishna	Madhira	IN	16.9181	80.3558	47.5	1850	wris	Medium
7504	BR_0001653	RIO POMBA	GUARANI	BR	-21.3556	-43.0503	398	1650	ana	High
7505	TZ_0000009	LITTLE RUAHA	IWAWA (55232339)	TZ	-8.05	35.6833	NA	1825	grdb	Medium
7507	FR_0000414	LOT	CASTELNAU	FR	44.5	2.86	NA	1650	ewa	High
7508	BR_0002030	RIO PARDO	CACHOEIRA DO CARMO	BR	-21.7331	-46.4661	875	1650	ana	High
7512	US_0008607	WILLOW CREEK	NEAR RIRIE ID	US	43.5833333	-111.746111	1508.78	1623.923	usgs	High
7514	IN_0000272	Godavari	Kosagumda	IN	19.2772	82.2333	556	1635	wris	High
7517	BR_0001418	NA	FAZENDA BRETZ - MONTANTE	BR	-18.9317	-42.1028	200	1710	ana	High
7519	BR_0002740	RIO SANTANA	NA	BR	-14.4517	-56.8142	215	1600	ana	High
7520	FR_0000941	AUBE	BLAINCOURT	FR	48.39	4.46	112.96	1640	ewa	High
7523	CA_0001505	MATANE RIVER	A 85 KM EN AMONT DU PONTROUTE 132 A MATANE	CA	48.7747192382812	-67.5419387817383	NA	1650	hydat	High
7524	BR_0002376	NA	LAVRINHA	BR	-24.7167	-50.1333	960	1660	ana	High
7525	US_0002205	TOWN CREEK	NEAR NETTLETON, MS	US	34.05916667	-88.6280556	59.13	1605.793	usgs	High
7526	BR_0002689	RIO CHOPIM	SALTO CLAUDELINO	BR	-26.2781	-52.2956	1026	1660	ana	High
7528	US_0002708	MAD RIVER	NEAR DAYTON OH	US	39.79728106	-84.088548	236.61	1644.642	usgs	High
7529	FR_0000715	SIOULE	EBREUIL	FR	46.12	3.09	NA	1650	ewa	High
7530	NI_0000009	RIO TUMA	MASAPA	NI	13.1	-85.52	220	1649	grdb	High
7531	CA_0000441	ONAPING RIVER	NEAR LEVACK	CA	46.5994987487793	-81.3819732666016	NA	1647.69	hydat	High
7534	CA_0003854	DOUGLAS RIVER	NEAR CLUFF LAKE	CA	58.3190002441406	-109.78946685791	NA	1690	hydat	High
7537	BR_0001318	NA	NA	BR	-18.2647	-40.0336	21	1670	ana	High
7538	FR_0000986	SERRE	PONT-A-BUCY	FR	49.69	3.48	53.66	1630	ewa	High
7539	GB_0000230	NENE	ORTON	GB	52.56	-0.27	3	1634	grdb	High
7540	CO_0000033	LENGUPA	SAN AGUSTIN	CO	4.85	-73.23	440	1641	grdb	High
7543	CR_0000013	GRANDE DE TARCOLES	BALSA	CR	9.93	-84.38	267	1638	grdb	High
7548	ES_0000718	GUADAJOZ O ALMEDINILLA	CASTRO DEL RIO	ES	37.6922222222222	-4.50222222222222	205	1665	afd	High
7550	BR_0002664	RIO DA AREIA	BALSA DO PINHALZINHO	BR	-25.9378	-51.4058	750	1640	ana	High
7553	LS_0000019	ORANGE	MOKHOTLONG (66819306)	LS	-29.2833	28.9833	2000	1701	grdb	High
7556	CA_0002153	WATERTON RIVER	NEAR GLENWOOD	CA	49.4333610534668	-113.48477935791	NA	1631.4	hydat	High
7558	BR_0001756	NA	NA	BR	-16.1458	-48.6017	NA	1650	ana	High
7560	BR_0000640	RIO CHORO	CAIO PRADO	BR	-4.6578	-38.9433	111	1610	ana	High
7561	IE_0000040	BARROW	LEVITSTOWN LOCK BRIDGE	IE	52.98	-6.97	NA	1660	ewa	High
7562	BR_0001036	RIO ARROJADO	BEBEDOURO	BR	-13.7372	-45.4639	NA	1520	ana	Medium
7563	TH_0000149	LAM CHOEN	BAN THA DUA	TH	16.4933	102.1283	NA	1500	grdb	Medium
7567	NI_0000013	MICO	MUELLE DE LOS BUEYES	NI	12.07	-84.53	30	1613	grdb	High
7568	BR_0002871	RIO FORQUILHA OU INHANDUVA	PASSO DO GRANZOTTO	BR	-27.8786	-51.7547	600	1620	ana	High
7569	GB_0000233	THAMES	EYNSHAM	GB	51.77	-1.36	60	1616	grdb	High
7573	CA_0003620	LOBSTICK RIVER	NEAR ENTWISTLE	CA	53.6108283996582	-115.010833740234	NA	1650	hydat	High
7578	BR_0002536	NA	SALTO WEBER SANTA HELENA	BR	-24.8469	-54.3147	205	1620	ana	High
7579	DE_0000787	NEISSE RIVER / NYSA LUZYCKA	GOERLITZ	DE	51.161	14.993	176	1621	grdb	High
7583	CA_0003787	REDWILLOW RIVER	NEAR BEAVERLODGE	CA	55.0819396972656	-119.525001525879	NA	1610	hydat	High
7584	FR_0000772	ANGLIN	MERIGNY	FR	46.63	0.93	72.76	1630	ewa	High
7589	US_0005628	NEOSHO RIVER	NEAR AMERICUS, KS	US	38.46695699	-96.2505533	337.41	1610.973	usgs	High
7590	IN_0000283	Pampa	Malakkara	IN	9.3325	76.6631	11.43	1713	wris	Medium
7591	BR_0000945	NA	NA	BR	-16.8744	-46.5867	520	1590	ana	High
7592	CO_0000031	ZULIA	SAN JAVIER	CO	7.88	-72.62	200	1579	grdb	High
7593	RU_0000263	OSKOL	STARY OSKOL	RU	51.3	37.88	200	1540	ewa	High
7594	RU_0000322	INSAR	SARANSK	RU	54.2	45.22	200	1610	ewa	High
7595	CA_0002003	IVANHOE RIVER	AT FOLEYET	CA	48.2502098083496	-82.4438095092773	NA	1640.78	hydat	High
7596	CA_0001496	RIMOUSKI RIVER	A 37 KM EN AMONT DU PONTROUTE 132	CA	48.413330078125	-68.5561065673828	NA	1610	hydat	High
7597	CA_0001500	RIMOUSKI RIVER	NA	CA	48.4124984741211	-68.5555572509766	NA	1610	hydat	High
7607	BR_0002133	NA	NA	BR	-23.4833	-46.4333	NA	1640	ana	High
7610	CA_0000272	MERSEY RIVER	AT INDIAN GARDENS	CA	44.1613883972168	-65.0086135864258	NA	1550	hydat	High
7611	CA_0003714	AKIE RIVER	NEAR THE 760 M CONTOUR	CA	57.1911087036133	-124.901107788086	NA	1690	hydat	High
7612	CA_0003511	BARRINGTON RIVER	ABOVE FIRST RAPIDS	CA	56.7638893127441	-99.9736099243164	NA	1760	hydat	Medium
7613	MX_0000042	RIO CAZONES	POZA RICA	MX	20.5467	-97.4583	50	1600	grdb	High
7618	ES_0000422	JARAMA	VALDEPEÑAS DE LA SIERRA	ES	40.8688888888889	-3.46611111111111	695	1620	afd	High
7620	US_0005670	ILLINOIS RIVER	NEAR WATTS, OK	US	36.13008185	-94.5721645	272.43	1631.693	usgs	High
7624	BR_0000352	RIO BAGAGEM	NA	BR	-14.5681	-48.1586	483	1610	ana	High
7626	US_0006216	HUBBARD CREEK	BELOW ALBANY, TX	US	32.73289717	-99.1406299	361.19	1587.663	usgs	High
7628	CA_0006246	FRENCHMAN RIVER	BELOW EASTEND RESERVOIR	CA	49.5149993896484	-108.831672668457	NA	1600	hydat	High
7630	RU_0000478	VOCH	VERKHNAYA VOCH	RU	61.13	54.2	114.21	1600	arcticnet	High
7633	BR_0000562	RIO PRETO	BONSUCESSO	BR	-3.5678	-43.3169	NA	1610	ana	High
7634	BR_0002209	RIO CORUMBATAI	RECREIO	BR	-22.5814	-47.6836	NA	1580	ana	High
7635	DE_0000664	TAUBER	TAUBERBISCHOFSHEIM	DE	49.6259	9.6657	172.27	1584	grdb	High
7637	IN_0000299	Godavari	Sangam	IN	17.5789	80.7803	57.69	1565	wris	High
7640	US_0002271	TALLAHALA CREEK	NEAR RUNNELSTOWN, MS	US	31.33277778	-89.1125	31.88	1585.073	usgs	High
7641	BR_0003123	NA	NA	BR	-27.1131	-49.9944	360	1570	ana	High
7644	CA_0003792	BEAR RIVER	NEAR GRANDE PRAIRIE	CA	55.2000007629395	-118.835563659668	NA	1510	hydat	High
7645	CA_0003861	SALT RIVER	BELOW PEACE POINT HIGHWAY	CA	59.8333282470703	-111.969436645508	NA	1670	hydat	Medium
7648	US_0002235	LOCUST FORK	AT TRAFFORD, AL.	US	33.8303785	-86.7558273	94.22	1616.153	usgs	High
7649	RU_0000226	PECHA	PADUN	RU	68.56	31.7	23	1600	arcticnet	High
7650	CA_0000076	RESTIGOUCHE RIVER	ABOVE KEDGWICK RIVER	CA	47.6563911437988	-67.4941711425781	NA	1570	hydat	High
7651	CA_0005385	MOYIE RIVER	AT EASTPORT	CA	48.9991683959961	-116.179718017578	NA	1480	hydat	Medium
7652	RU_0000273	MALKA	KAMENNOMOSTSKOJE	RU	43.73	43.07	2000	1540	ewa	High
7653	US_0003712	ST. REGIS RIVER	AT BRASHER CENTER NY	US	44.8636111	-74.77888889	66.21	1585.073	usgs	High
7657	US_0008698	NF PAYETTE RIVER	AT CASCADE ID	US	44.52489317	-116.0467983	1438.67	1595.433	usgs	High
7659	US_0004786	FIRESTEEL CREEK	NEAR MOUNT VERNON,SD	US	43.77640219	-98.2456658	395.4	1522.913	usgs	High
7660	IE_0000080	NORE	JOHNS BRIDGE	IE	52.6517	-7.2502	NA	1644.1	grdb	High
7661	BR_0000467	RIO MURICIZAL	NA	BR	-7.1453	-48.6103	193	1580	ana	High
7662	FR_0000193	GARD	LA BAUME LA SIGNORE	FR	43.94	4.43	NA	1580	ewa	High
7664	BR_0003184	NA	NA	BR	-28.3167	-49.15	40	1560	ana	High
7665	IE_0000048	SUIR	CAHIR PARK	IE	52.37	-7.92	NA	1602	ewa	High
7667	ZA_0000237	BRONKHORSTSPRUIT	ROODEPOORT (27528001)	ZA	-25.7925	28.755	1379	1599	grdb	High
7668	FR_0000168	ISERE	AIGUEBLANCHE	FR	45.5	6.51	NA	1580	ewa	High
7669	CA_0003052	SHELL RIVER	NEAR DUCK LAKE	CA	51.1694412231445	-101.327781677246	NA	1650	hydat	High
7670	CA_0004436	BAKER CREEK	AT QUESNEL	CA	52.9738883972168	-122.509437561035	NA	1550	hydat	High
7672	HN_0000003	AGUA CALIENTE	AGUA CALIENTE	HN	14.67	-87.32	NA	1573	grdb	High
7674	GB_0000046	DERWENT (TRIB. NORTH SEA)	BUTTERCRAMBE	GB	54.019	-0.884	9.5	1586	grdb	High
7676	US_0007051	BURRO CREEK	AT OLD US 93 BRIDGE, NEAR BAGDAD, AZ	US	34.5416838	-113.4452053	573.03	1556.583	usgs	High
7677	CA_0003447	ANGLING RIVER	NEAR BIRD	CA	56.6769409179688	-93.64111328125	NA	1560	hydat	High
7678	BR_0002173	NA	BAIRRO SARAPU	BR	-23.3994	-47.7567	550	1550	ana	High
7679	CA_0003785	BEAVERLODGE RIVER	NEAR BEAVERLODGE	CA	55.1892700195312	-119.43724822998	NA	1610	hydat	High
7684	ES_0001006	IRATI	LIEDENA	ES	42.6247222222222	-1.29361111111111	412	1546	afd	High
7685	RU_0000468	YENA	YENA	RU	67.56	31.01	151.26	1620	arcticnet	High
7686	NZ_0000005	WHAKATANE	WHAKATANE	NZ	-38.007	176.995	11	1557	grdb	High
7690	TZ_0000004	MBARALI	IGAWA (55232111)	TZ	-8.7833	34.3667	1100	1546	grdb	High
7691	US_0005784	YOCONA RIVER	AT ENID DAM, MS	US	34.15816665	-89.9039783	60.96	1450.393	usgs	Medium
7693	BR_0002375	NA	NA	BR	-24.7503	-50.0894	970	1590	ana	High
7694	CZ_0000019	MORAVA	MORAVICANY	CZ	49.75	16.9667	244	1559	grdb	High
7695	CO_0000025	SAN JUAN (TRIB. CARARE, MAGDALENA)	BORBUR	CO	5.65	-74.07	457	1607	grdb	High
7696	HU_0000037	BODVAJ	SZENDRO	HU	48.4	20.7333	139	1496	grdb	High
7699	CA_0002376	SHEEP RIVER	NEAR ALDERSYDE	CA	50.7125015258789	-113.880561828613	NA	1565.3	hydat	High
7700	DE_0000162	WOERNITZ	HARBURG	DE	48.7832	10.6924	403.09	1578	grdb	High
7701	DE_0000027	ZSCHOPAU	LICHTENWALDE	DE	50.89	13.02	NA	1575	ewa	High
7703	BR_0001412	RIO GUANHAES	SENHORA DO PORTO	BR	-18.8947	-43.0825	581	1520	ana	High
7709	IN_0000205	Cauvery	Hogenakkal	IN	12.1208	77.7856	260	1636	wris	High
7710	BR_0002976	RIO ITU	NA	BR	-29.1992	-55.4842	100	1560	ana	High
7711	TH_0000071	PING RIVER	THA SING PHITHAK	TH	18.5756	99.0122	NA	1569	game	High
7714	RU_0000294	NAVLIA	NAVLIA	RU	52.83	34.5	210	1560	ewa	High
7715	ZW_0000014	SEBAKWE	SEBAKWE DAM D/S G/W (63341047)	ZW	-19.0667	30.35	NA	1622	grdb	High
7718	CA_0001391	SAINTEANNE RIVER	A 13 KM EN AVAL DU BARRAGE A CHUTEPANET	CA	46.8527793884277	-71.8775024414062	NA	1550	hydat	High
7722	CA_0001275	NICOLET RIVER	A 58 KM EN AVAL DE LA RIVER BULSTRODE	CA	46.0563888549805	-72.3063888549805	NA	1540	hydat	High
7723	US_0005882	WILDHORSE CREEK	NEAR HOOVER, OK	US	34.54147378	-97.2472436	243.32	1553.993	usgs	High
7724	CA_0001199	CROCHE RIVER	A 26 KM EN AVAL DU RUISSEAU CHANGY	CA	47.767219543457	-72.7366714477539	NA	1570	hydat	High
7728	BR_0001521	NA	BAIRRO DO CARACOL	BR	-23.4111	-45.6389	NA	1480	ana	High
7737	CA_0000337	PIGEON RIVER	AT MIDDLE FALLS	CA	48.0122184753418	-89.6161117553711	NA	1550	hydat	High
7739	ES_0000160	BIBEY	MONTEFURADO	ES	42.3855555555556	-7.21722222222222	260	1559	afd	High
7740	RO_0000042	VISEUL	BISTRA	RO	47.8628	24.1931	1020	1547	grdb	High
7741	FR_0001101	ILL	CHASSEUR FROID	FR	48.62	7.79	NA	1500	ewa	High
7746	BR_0001441	NA	NA	BR	-20.1167	-41.9167	NA	1520	ana	High
7750	US_0006530	GALISTEO CREEK	BELOW GALISTEO DAM, NM	US	35.46465278	-106.2133889	1661.18	1543.633	usgs	High
7751	ZA_0000289	ELANDSRIVIER (TRIB. INCOMATI)	LINDENAU (27613215)	ZA	-25.4903	30.6983	833	1557	grdb	High
7752	BR_0002924	RIO TURVO	NA	BR	-27.3922	-53.8808	240	1540	ana	High
7753	RU_0000472	VOZHEGA	NAZAROVSKAYA	RU	60.53	39.55	125.65	1590	arcticnet	High
7754	MY_0000019	SELANGOR	RANTAU PANJANG	MY	3.4	101.43	33	1450	grdb	Medium
7755	US_0006996	CLEAR CREEK	NEAR WINSLOW, AZ	US	34.96946689	-110.6451326	1481.75	1608.383	usgs	High
7758	ES_0000245	ORBIGO	SANTA MARINA DEL REY	ES	42.5072222222222	-5.87666666666667	835	1554	afd	High
7759	CA_0003403	CEDAR RIVER	BELOW WABASKANG LAKE	CA	50.5075607299805	-93.2585830688477	NA	1690	hydat	Medium
7761	ES_0001110	ESERA	REVERSIONES	ES	42.1016666666667	0.24	333	1532	afd	High
7764	BR_0002352	NA	MARACAI (7D-008)	BR	-22.6167	-50.6833	NA	1560	ana	High
7765	BR_0001329	NA	BARRA DO ARIRANHA	BR	-18.6667	-41.05	NA	1550	ana	High
7766	CA_0005956	DEASE RIVER	AT OUTLET OF DEASE LAKE	CA	58.8138885498047	-130.08332824707	NA	1520	hydat	High
7768	MX_0000044	RIO BOBOS	MARTINEZ DE LA TORRE	MX	20.0617	-97.0283	153	1467	grdb	High
7774	BR_0000890	RIO DAS VELHAS	NA	BR	-20.0247	-43.8239	721	1550	ana	High
7775	BR_0000891	RIO DAS VELHAS	NA	BR	-20.0167	-43.8167	721	1550	ana	High
7776	BR_0002314	NA	NA	BR	-24.0333	-49.4667	530	1550	ana	High
7777	US_0005845	DEEP RED CREEK	NEAR RANDLETT, OK	US	34.22092454	-98.4531104	281.79	1564.353	usgs	High
7778	CH_0000101	TICINO	BELLINZONA	CH	46.194	9.009	270	1515	grdb	High
7779	CN_0000106	BING LANG JIANG	ZHAN XI	CN	25.06666667	98.15	NA	1548	chdp	High
7780	BR_0000812	NA	JAGUARUNA JUSANTE	BR	-19.7436	-44.8183	600	1560	ana	High
7781	US_0000072	PRESUMPSCOT RIVER	AT WESTBROOK, MAINE	US	43.68694444	-70.3472222	4.09	1494.423	usgs	High
7783	BR_0002470	NA	QUINTA DO SOL	BR	-23.8236	-52.1786	315	1530	ana	High
7785	US_0004738	CHOTEAU CREEK	NEAR AVON SD	US	42.9235524	-98.1063243	393.2	1538.453	usgs	High
7788	ZA_0000140	KEISKAMMA	KAMAS LOC. (27672413)	ZA	-33.0117	26.9542	283	1429	grdb	Medium
7789	EC_0000010	TOACHI	A.J.PILATON	EC	-0.3156	-78.9514	820	1435	grdb	Medium
7790	CA_0004161	MOSLEY CREEK	NEAR DUMBELL LAKE	CA	51.4086112976074	-124.931671142578	NA	1550	hydat	High
7791	HU_0000026	ZALA	ZALAAPATI	HU	46.7333	17.1167	106	1528	grdb	High
7793	US_0002702	STILLWATER RIVER	AT ENGLEWOOD OH	US	39.87033349	-84.2860557	235.06	1683.492	usgs	Medium
7794	US_0006223	PALO PINTO CREEK	NEAR SANTO, TX	US	32.630964	-98.1808781	232.45	1484.063	usgs	High
7797	CN_0000108	DA YING JIANG	LIANG HE	CN	24.8	98.25	NA	1525	chdp	High
7798	BR_0002959	RIO TOROPI	CACHOEIRA 5 VEADOS	BR	-29.4289	-54.0542	160	1540	ana	High
7799	ES_0001031	FLUMEN	ALBALATILLO	ES	41.7594444444444	-0.180277777777778	245	1499	afd	High
7801	US_0001928	ST. MARKS RIVER	NEAR NEWPORT, FLA.	US	30.2714311	-84.1482508	1.08	1385.644	usgs	Medium
7802	DE_0000773	ISAR	BAD TOELZ KRAFTWERK	DE	47.7792	11.5403	631	1558.8	grdb	High
7804	IT_0000219	TANARO	FARIGLIANO	IT	44.51	7.9	235	1522	grdb	High
7806	IE_0000061	ERNE	BELTURBET	IE	54.0974	-7.4516	NA	1491.8	grdb	High
7807	CI_0000024	KO	LOGOUALE	CI	7.09	-7.53	NA	1530	grdb	High
7809	ZA_0000284	KROKODILRIVIER (TRIB. INCOMATI)	MONTROSE (27613213)	ZA	-25.4486	30.7117	793	1512	grdb	High
7811	US_0002035	SPRING CREEK	NEAR REYNOLDSVILLE, GA	US	30.90407668	-84.7490864	0	1478.883	usgs	High
7813	ES_0001065	ESERA	BARASONA	ES	42.1236111111111	0.308888888888889	500	1511	afd	High
7814	ZA_0000182	MOOIRIVIER (TRIB. TUGELA)	DOORNKLOOF	ZA	-29.0714	30.2456	1098	1546	grdb	High
7816	BR_0002679	RIO CAVERNOSO	USINA CAVERNOSO	BR	-25.4925	-52.2139	560	1490	ana	High
7817	AO_0000003	OKAVANGO / CUBANGO	CHINHAMA (44932108)	AO	-13.05	16.3667	NA	1389	grdb	Medium
7819	IL_0000004	JORDAN RIVER	OBSTACLE BRIDGE	IL	33.03	35.62	64	1376	grdb	Medium
7824	CA_0004641	SALMON RIVER	NEAR SALMON ARM	CA	50.6925086975098	-119.330528259277	NA	1550	hydat	High
7831	US_0002435	MAHONING RIVER	AT LEAVITTSBURG OH	US	41.23922335	-80.880642	265.38	1489.243	usgs	High
7833	US_0001901	LITTLE RIVER	NEAR ADEL, GA	US	31.15555556	-83.5436111	52.76	1494.423	usgs	High
7836	US_0005605	ELK RIVER	NEAR ELK CITY, KS	US	37.2664504	-95.918041	242.56	1489.243	usgs	High
7839	CA_0000282	MEDWAY RIVER	AT CHARLESTON	CA	44.1733283996582	-64.6600036621094	NA	1390	hydat	Medium
7840	BR_0002297	RIO ITAPETININGA	PORTO VELHO	BR	-23.6253	-48.1047	630	1520	ana	High
7841	CA_0001272	LOUP RIVER	DU A LOUISEVILLE	CA	46.2649993896484	-72.9369430541992	NA	1520	hydat	High
7844	CN_0000080	CHUAN HE	MAN YAN	CN	24.53333333	100.8166667	NA	1537	chdp	High
7845	BR_0000811	NA	JAGUARUNA	BR	-19.7667	-44.8	667	1490	ana	High
7847	US_0007152	AGUA FRIA RIVER	NEAR MAYER, AZ	US	34.3153073	-112.0640455	1046.7	1515.143	usgs	High
7848	US_0006353	NAVIDAD RIVER	AT STRANE PK NEAR EDNA, TX	US	29.06553568	-96.6741434	12.96	1499.603	usgs	High
7849	SZ_0000025	NGWEMPISI	BOSCH HOEK (68632221)	SZ	-26.7431	30.8033	NA	1485	grdb	High
7851	CA_0005306	BULL RIVER	NEAR WARDNER	CA	49.4936218261719	-115.365837097168	NA	1520	hydat	High
7852	MX_0000040	RIO CALABOZO	TERRERILLOS	MX	21.0335	-98.1332	137	1493	grdb	High
7853	US_0002645	PAINT CREEK	NEAR BAINBRIDGE OH	US	39.25228728	-83.3493577	227.38	1476.293	usgs	High
7855	IE_0000062	SUIR	CATHER PARK	IE	52.4592	-7.923	NA	1582.7	grdb	Medium
7856	CA_0004163	HOMATHKO RIVER	BELOW NOSTETUKO RIVER	CA	51.4211082458496	-124.506942749023	NA	1550	hydat	High
7857	DE_0000638	SIEG	EITORF	DE	50.777	7.4427	83.53	1472	grdb	High
7858	BR_0002525	RIO PIRATIY	SALTO DEL GUAIRA	BR	-24.0683	-54.3603	218	1480	ana	High
7859	US_0006291	N CONCHO RIVER	AT STERLING CITY, TX	US	31.83013918	-100.9937215	683.48	1471.113	usgs	High
7863	BR_0002321	RIO VERDE	ITAPORANGA	BR	-23.7	-49.4667	NA	1480	ana	High
7865	CZ_0000011	SAZAVA	ZRUC NAD SAZAVOU	CZ	49.74	15.1	324	1421	grdb	High
7866	CA_0002368	SHEEP RIVER	AT OKOTOKS	CA	50.7238883972168	-113.973472595215	NA	1493.9	hydat	High
7867	RU_0000272	TEREK	VLADIKAVKAZ	RU	43.03	44.68	2540	1490	ewa	High
7869	ES_0000767	GUADIATO	BREÑA, LA	ES	37.8283333333333	-5.04166666666667	121	1493	afd	High
7870	SI_0000013	SOCA / INSONZO	SOLKAN I	SI	45.982	13.655	52	1573	grdb	High
7874	GB_0000021	TWEED (SCOTLAND)	BOLESIDE	GB	55.5917	-2.7981	94.5	1500	grdb	High
7878	ES_0000315	PISUERGA	HERRERA DE PISUERGA	ES	42.5608333333333	-4.30388888888889	826	1464	afd	High
7880	BR_0003065	NA	MIRACATU	BR	-24.2811	-47.4606	11	1480	ana	High
7882	US_0005856	MUD CREEK	NEAR COURTNEY, OK	US	34.00426516	-97.566968	221.81	1486.653	usgs	High
7884	US_0000054	SEBASTICOOK RIVER	NEAR PITTSFIELD, MAINE	US	44.71666667	-69.41388889	40.83	1481.473	usgs	High
7885	CA_0003979	UNUK RIVER	NEAR STEWART	CA	56.351390838623	-130.691665649414	NA	1480	hydat	High
7888	BR_0000472	RIO PIRANHAS	MONTANTE DO RIO RONCA	BR	-6.0428	-48.1997	119	1530	ana	High
7890	US_0006033	LAKE FK CREEK	NEAR QUITMAN, TX	US	32.76318386	-95.4630094	96.75	1515.143	usgs	High
7891	BR_0001327	NA	JUSANTE BARRA DO ARIRANHA	BR	-18.6656	-41.0992	200	1490	ana	High
7892	BY_0000008	OSHMYANKA	VELIKIYA YATSINI	BY	54.73	26.22	124.58	1480	ewa	High
7894	GE_0000001	BZIPI	JIRKHVA (DZIRKHVA)	GE	43.232	40.377	70	1410	grdb	High
7896	BR_0001328	NA	BARRA DO ARIRANHA - MONTANTE	BR	-18.6667	-41.1	NA	1490	ana	High
7897	BR_0002890	RIO IRANI	BARCA IRANI	BR	-27.1656	-52.5228	280	1500	ana	High
7900	FR_0000721	ALLIER	PRADES	FR	45.03	3.59	NA	1350	ewa	Medium
7901	DE_0000056	ILMENAU	BIENENBUETTEL	DE	53.15	10.464	14	1434	grdb	High
7905	CO_0000001	QUITO	SAN ISIDRO	CO	5.63	-76.75	30	1436	grdb	High
7906	CA_0005345	ST MARY RIVER	NEAR MARYSVILLE	CA	49.6080589294434	-116.168609619141	NA	1480	hydat	High
7907	ES_0001107	ARAGON	YESA C.E.	ES	42.6108333333333	-0.9975	497	1471	afd	High
7908	CN_0000078	NAN XI HE	LA HA DI	CN	22.95	103.8	NA	1627	chdp	Medium
7909	BR_0000199	RIO MANICORE	FAZENDA BELA VISTA	BR	-7.8533	-61.3339	NA	1530	ana	High
7913	US_0008606	WILLOW CREEK	BELOW TEX CREEK NEAR RIRIE ID	US	43.44194444	-111.7283333	1584.98	1471.113	usgs	High
7914	BR_0002899	RIO CHAPECOZINHO	CHAPECOZINHO - JUSANTE	BR	-26.7525	-52.4619	640	1430	ana	High
7918	IN_0000077	Godavari	Sonarpal	IN	19.2697	81.8839	541	1523	wris	High
7919	BR_0000677	RIO DO PEIXE	ANTENOR NAVARRO	BR	-6.7353	-38.4481	240	1450	ana	High
7922	DE_0000449	VECHTE	TINHOLT	DE	52.61	6.95	13.79	1405	ewa	High
7926	FR_0000652	HUISNE	LES AJEUX	FR	48.16	0.64	NA	1420	ewa	High
7928	CA_0003746	MOBERLY RIVER	NEAR FORT ST JOHN	CA	56.0924987792969	-121.36678314209	NA	1520	hydat	High
7930	PH_0000004	JALAUR	CALYAN,POTOTAN	PH	10.93	122.67	8	1499	grdb	High
7934	BR_0002870	RIO FORQUILHA OU INHANDUVA	NA	BR	-27.9333	-51.7333	600	1470	ana	High
7935	BR_0002287	RIO ANHANDUZINHO	FAZENDA DIVISA	BR	-21.2075	-53.955	337	1460	ana	High
7938	US_0005602	FALL RIVER	NEAR FALL RIVER, KS	US	37.6445207	-96.0570703	273.85	1515.143	usgs	High
7940	IN_0000027	Narmada	Belkheri	IN	22.9289	79.3394	NA	1508	wris	High
7942	BR_0003064	NA	ABAIXO FAU	BR	-24.2644	-47.4506	NA	1460	ana	High
7945	BR_0003267	RIO DOS SINOS	TAQUARA MONTANTE	BR	-29.7208	-50.735	110	1460	ana	High
7947	FR_0000618	ARON	VERNEUIL	FR	46.85	3.58	191.44	1470	ewa	High
7948	ES_0000265	TORMES	PUENTE CONGOSTO	ES	40.5044444444444	-5.52861111111111	913	1620	afd	Medium
7950	ES_0001039	NOGUERA PALLARESA	COLLEGATS	ES	42.285	1.03944444444444	540	1518	afd	High
7952	RU_0000358	TCHAPAJEVKA	PODJEM-MIKHAILO	RU	52.82	50.52	132	1480	ewa	High
7953	CA_0000043	NASHWAAK RIVER	AT DURHAM BRIDGE	CA	46.125919342041	-66.6113128662109	NA	1450	hydat	High
7957	BR_0002172	NA	BAIRRO DO SARAPU	BR	-23.4833	-47.8	520	1430	ana	High
7961	CA_0000408	AUBINADONG RIVER	ABOVE SESABIC CREEK	CA	46.9684181213379	-83.416862487793	NA	1451.66	hydat	High
7963	CA_0005106	SPILLIMACHEEN RIVER	NEAR SPILLIMACHEEN	CA	50.9043502807617	-116.40682220459	NA	1460	hydat	High
7964	DE_0000154	SCHMIECHA	UNTERSCHMEIEN	DE	48.09	9.15	598.4	1506.33	ewa	High
7966	DE_0000586	ENZ	PFORZHEIM	DE	48.9	8.73	244.55	1476	ewa	High
7967	DE_0000829	ENZ	PFORZHEIM	DE	48.8971	8.7295	244.55	1476	grdb	High
7968	BR_0003138	NA	BARRA DO PRATA	BR	-26.6983	-49.8311	450	1430	ana	High
7970	CA_0000088	CASCAPEDIA RIVER	EN AVAL DU LAC CASCAPEDIA	CA	48.666389465332	-66.1894378662109	NA	1480	hydat	High
7972	US_0005847	S WICHITA RIVER	NEAR BENJAMIN, TX	US	33.644257	-99.8009252	406.68	1512.553	usgs	High
7977	ES_0000239	ERESMA	BENARDOS	ES	41.1569444444444	-4.34333333333333	782	1438	afd	High
7982	FR_0000931	SEINE	POLISY	FR	48.06	4.38	160.38	1450	ewa	High
7983	CA_0000506	NORTH BRANCH MUSKOKA RIVER	NEAR PORT SYDNEY	CA	45.1827812194824	-79.2761077880859	NA	1440	hydat	High
7985	CA_0003688	MUSKEG RIVER	NEAR FORT MACKAY	CA	57.1912002563477	-111.570137023926	NA	1461	hydat	High
7988	FR_0000923	VESLE	BRAINE	FR	49.34	3.53	50.37	1440	ewa	High
7993	SZ_0000029	UMPULUZI, UMPILUSI	MPULUZI (68632223)	SZ	-26.3928	30.8433	NA	1454	grdb	High
7994	US_0006365	GUADALUPE RIVER	NEAR CENTER POINT, TX	US	29.98777778	-99.11	466.21	1432.263	usgs	High
7995	US_0000288	DEERFIELD RIVER	NEAR WEST DEERFIELD, MA	US	42.53591957	-72.65342328	47.77	1442.623	usgs	High
7996	CA_0003414	BROKENHEAD RIVER	AT ST OUENS	CA	50.0508308410645	-96.4458312988281	NA	1530	hydat	Medium
7997	CA_0000063	MAGAGUADAVIC RIVER	AT SECOND FALLS	CA	45.2316703796387	-66.8433303833008	NA	1540	hydat	Medium
7998	MW_0000030	THUCHILA	CHENDO (65312102)	MW	-16	35.3	NA	1446	grdb	High
8000	DE_0000695	EDER	AFFOLDERN	DE	51.1677	9.0872	193.19	1452	grdb	High
8001	CA_0004310	CAMPBELL RIVER	NEAR CAMPBELL RIVER	CA	50.0380592346191	-125.294723510742	NA	1470	hydat	High
8002	ES_0000799	GUADALENTIN	PUENTES (DESEMBALSE RIO Y ACEQUIA)	ES	37.7372222222222	-1.81861111111111	410	1389	afd	High
8003	IN_0000199	Cauvery	K.M.Vadi	IN	12.3422	76.2875	765	1330	wris	Medium
8004	CA_0002048	OLDMAN RIVER	NEAR WALDRONS CORNER	CA	49.8138885498047	-114.183326721191	NA	1446.1	hydat	High
8006	CA_0003986	FULTON RIVER	AT THE MOUTH	CA	54.8138885498047	-126.170829772949	NA	1400	hydat	High
8007	ZM_0000039	MULUNGUSHI	GREAT NORTH ROAD BRIDGE	ZM	-14.3	28.55	NA	1448	grdb	High
8012	CA_0004830	NICOLA RIVER	ABOVE NICOLA LAKE	CA	50.182559967041	-120.375106811523	NA	1500	hydat	High
8013	US_0001620	CANOOCHEE RIVER	NEAR CLAXTON, GA	US	32.18491397	-81.8887265	24.54	1437.443	usgs	High
8014	CA_0003690	ELLS RIVER	BELOW GARDINER LAKES	CA	57.375	-112.561111450195	NA	1380	hydat	High
8018	CA_0000518	BLACK RIVER	NEAR WASHAGO	CA	44.7136688232422	-79.281608581543	NA	1510.27	hydat	Medium
8019	AF_0000025	BALKH	NEAR NAYAK	AF	34.75	67	2580	1460	grdb	High
8022	BR_0001494	RIO CASTELO	NA	BR	-20.7025	-41.1736	200	1420	ana	High
8023	CA_0003245	RAT RIVER	NEAR OTTERBURNE	CA	49.4619789123535	-97.0090026855469	NA	1420	hydat	High
8026	BR_0001881	RIO FORMOSO	FAZENDA FORMOSO	BR	-18.4067	-52.5325	NA	1450	ana	High
8027	MY_0000017	DUNGUN	JAMBATAN JERANGAU	MY	4.84	103.21	15	1480	grdb	High
8031	US_0005801	BIG SUNFLOWER RIVER	NEAR MERIGOLD, MS	US	33.8325	-90.67	30.48	1432.263	usgs	High
8032	US_0005107	BIG CREEK	NEAR HAYS, KS	US	38.852234	-99.3181589	595.55	1421.903	usgs	High
8033	US_0006382	SANDIES CREEK	NEAR WESTHOFF, TX	US	29.2152475	-97.4494353	54.34	1421.903	usgs	High
8035	CN_0000053	WO KA HE	WO KA	CN	29.3	92.2	NA	1434	chdp	High
8039	BR_0000457	NA	NA	BR	-11.3231	-49.2592	211	1420	ana	High
8040	CA_0001269	LOUP RIVER	DU A LOUISEVILLE	CA	46.2963905334473	-72.9127807617188	NA	1430	hydat	High
8041	CA_0000086	CASCAPEDIA PETITE RIVER	EN AMONT DU PONT	CA	48.1891708374023	-65.8119430541992	NA	1390	hydat	High
8046	BR_0000925	NA	NA	BR	-17.9964	-44.1775	516	1420	ana	High
8047	BR_0001339	RIO PIRANGA	PIRANGA	BR	-20.6906	-43.2994	634	1400	ana	High
8049	FR_0000677	OUDON	ANDIGNE(P.AUX ANGLAIS)	FR	47.67	-0.76	18.14	1410	ewa	High
8050	ES_0000928	MIJARES	ARENOS ENTRADA E. (C.E. LOS CANTOS)	ES	40.1169444444444	-0.604444444444444	602	1396	afd	High
8051	BR_0002625	RIO CANOINHAS	NA	BR	-26.15	-50.3831	760	1430	ana	High
8053	RU_0000315	KOLOKSHA	BABAIEVO	RU	56.1	40.1	170	1380	ewa	High
8054	CA_0001202	MATAWIN RIVER	A SAINTMICHELDESSAINTS	CA	46.6858291625977	-73.9141693115234	NA	1390	hydat	High
8055	BR_0000615	RIO DOS MATOS	CONGOS	BR	-4.0283	-41.9122	NA	1450	ana	High
8058	BR_0001451	NA	IPANEMA	BR	-19.7989	-41.7061	180	1410	ana	High
8059	US_0002290	ESCATAWPA RIVER	NEAR AGRICOLA MS	US	30.8118552	-88.4586274	14.02	1455.573	usgs	High
8060	CA_0004694	SALMON RIVER	ABOVE KERNAGHAN CREEK	CA	50.6347198486328	-119.387496948242	NA	1400	hydat	High
8061	DE_0000417	HUNTE	COLNRADE OP	DE	52.8285	8.4736	22.96	1313	grdb	Medium
8062	BR_0000889	NA	RIO ACIMA	BR	-20.1	-43.8	730	1420	ana	High
8065	US_0002510	LICKING RIVER	NEAR NEWARK OH	US	40.05923245	-82.3395948	237.22	1390.824	usgs	High
8066	SE_0000041	MOAELVEN	VAESTERSEL	SE	63.4334	18.298	NA	1465.2	grdb	High
8069	CA_0002751	SWIFT CURRENT CREEK	BELOW ROCK CREEK	CA	49.8444404602051	-108.479438781738	NA	1430	hydat	High
8070	BR_0003013	NA	NA	BR	-25.0456	-49.5469	390	1400	ana	High
8071	BR_0003272	NA	PASSO DAS CANOAS - AUXILIAR	BR	-29.9644	-50.9778	10	1410	ana	High
8072	BR_0002569	NA	NA	BR	-25.6436	-49.3561	886	1420	ana	High
8074	DE_0000760	ALTMUEHL	EICHSTAETT	DE	48.8885	11.1968	384	1400	grdb	High
8079	CA_0004491	BRIDGE CREEK	NEAR 100 MILE HOUSE	CA	51.7050018310547	-121.175827026367	NA	1330	hydat	High
8081	US_0005382	LANGUILLE RIVER	NEAR COLT, AR	US	35.1447222	-90.8780556	58.68	1385.644	usgs	High
8082	GB_0000220	DEE (SCOTLAND)	WOODEND	GB	57.05	-2.6	71	1370	grdb	High
8083	ZA_0000166	SWART-KEIRIVIER	CATHCARTS GIFT (27711504)	ZA	-32.0503	26.7897	1034	1414	grdb	High
8087	ZM_0000031	KAFUBU	MASAITI BOMA (60334245)	ZM	-13.2167	28.4	NA	1371	grdb	High
8092	BR_0001289	NA	POUSO ALEGRE	BR	-16.4333	-39.9	NA	1390	ana	High
8093	US_0002549	GREENBRIER RIVER	AT BUCKEYE, WV	US	38.18595326	-80.1306225	635.73	1398.594	usgs	High
8094	BR_0002266	NA	MACUCO / QUEIROZ	BR	-21.8	-50.15	NA	1400	ana	High
8100	BR_0001427	RIO ITAMBACURI	JAMPRUCA	BR	-18.4594	-41.8075	258	1390	ana	High
8101	US_0004684	ELK CREEK	NEAR ELM SPRINGS,SD	US	44.24831768	-102.5032217	702.87	1419.313	usgs	High
8102	CA_0004308	CAMPBELL RIVER	AT OUTLET OF CAMPBELL LAKE	CA	50.0022201538086	-125.388893127441	NA	1400	hydat	High
8103	BR_0000139	RIO BRANCO	CACHOEIRA DO CACHIMBO	BR	-11.9306	-62.1528	NA	1420	ana	High
8104	FI_0000081	PERHONJOKI	TUNKKARI	FI	63.499	23.756	65	1416	grdb	High
8105	US_0005919	WHITE OAK CREEK	NEAR TALCO, TX	US	33.32233617	-95.0927184	87.31	1279.454	usgs	Medium
8107	US_0007084	ARAVAIPA CREEK	NEAR MAMMOTH, AZ.	US	32.84423324	-110.6301	707.14	1390.824	usgs	High
8108	ZW_0000006	KANA	JAPIWA DIP G/W (63351137)	ZW	-18.5667	27.55	NA	1447	grdb	High
8109	IE_0000083	BOYNE	TRIM	IE	53.56	-6.79	NA	1282	ewa	Medium
8110	BR_0002652	RIO JANGADA	NA	BR	-26.1839	-51.2867	790	1380	ana	High
8115	BR_0002245	NA	FAZENDA SANTA HELOISA	BR	-21.5667	-48.9667	500	1360	ana	High
8118	BR_0001374	NA	RAUL SOARES MONTANTE	BR	-20.1036	-42.44	293	1350	ana	High
8120	CA_0000634	GRAND RIVER	AT CONESTOGO	CA	43.5411109924316	-80.4944381713867	NA	1420	hydat	High
8123	BR_0003012	NA	PEDRA BRANCA	BR	-25.0656	-49.585	440	1360	ana	High
8124	CA_0006027	SILVERBERRY RIVER	NEAR LITTLE DAL LAKE	CA	62.7655601501465	-126.692222595215	NA	1420	hydat	High
8125	US_0005574	BLACK BEAR CREEK	AT PAWNEE, OK	US	36.34366537	-96.7994788	244.68	1393.414	usgs	High
8126	CA_0000503	NORTH BRANCH MUSKOKA RIVER	AT PORT SYDNEY	CA	45.2128601074219	-79.2752838134766	NA	1410.11	hydat	High
8127	CA_0001485	BECANCOUR RIVER	A LYSTER	CA	46.3688888549805	-71.6224975585938	NA	1410	hydat	High
8128	TH_0000164	LAM DOM YAI	BAN FANG PHE	TH	14.69	105.16	NA	1410	grdb	High
8129	CA_0005639	TULAMEEN RIVER	AT COALMONT	CA	49.5083312988281	-120.691673278809	NA	1370	hydat	High
8133	CA_0001021	MADAWASKA RIVER	AT MADAWASKA	CA	45.5138893127441	-77.9847183227539	NA	1370	hydat	High
8137	DE_0000749	TOLLENSE	KLEMPENOW	DE	53.7926	13.3156	1	1403	grdb	High
8138	TH_0000049	PING RIVER	CHIANG DAO	TH	19.3525	98.9736	NA	1355	game	High
8140	FR_0001000	EPTE	FOURGES	FR	49.12	1.65	22.84	1370	ewa	High
8143	CA_0000060	MAGAGUADAVIC RIVER	AT ELMCROFT	CA	45.2733306884766	-66.8066711425781	NA	1420	hydat	High
8145	BR_0003219	RIO PARDO	NA	BR	-29.6733	-52.7694	35.23	1370	ana	High
8146	ES_0001014	ZADORRA	ARCE	ES	42.6786111111111	-2.89555555555556	455	1357	afd	High
8149	BR_0002105	RIO QUITERIA	NA	BR	-19.8833	-51.5117	441	1390	ana	High
8151	CN_0000016	PU ER HE	SAN KE ZHUANG	CN	22.88333333	100.7	NA	1372	chdp	High
8153	CA_0000311	ST MARYS RIVER	AT STILLWATER	CA	45.174388885498	-61.9799194335938	NA	1350	hydat	High
8161	GR_0000002	ACHELOOS	AVLAKION	GR	39.158	21.385	304	1349	grdb	High
8163	CA_0000267	TUSKET RIVER	AT TUSKET FALLS	CA	43.8813896179199	-65.9738922119141	NA	1450	hydat	Medium
8164	NZ_0000008	MOTU	HOUPOTO	NZ	-37.862	177.6373	14	1393	grdb	High
8166	US_0004752	KEYA PAHA RIVER	NEAR KEYAPAHA,SD	US	43.12917164	-100.1070671	679.71	1377.874	usgs	High
8170	RU_0000280	MALY ZELETCHUK	ALIBERDUKOVS	RU	44	41.73	1910	1320	ewa	High
8174	US_0005733	DEEP FORK	AT WARWICK, OK	US	35.68089589	-97.0083615	249.34	1364.924	usgs	High
8176	CA_0001266	LOUP RIVER	DU PRES DE SAINTPAULIN	CA	46.417781829834	-72.9558334350586	NA	1380	hydat	High
8180	CA_0001255	OUAREAU RIVER	AUX CHUTES DORWIN	CA	46.0299987792969	-73.7052764892578	NA	1270	hydat	Medium
8181	CA_0001060	RIDEAU RIVER	ABOVE SMITHS FALLS	CA	44.8905601501465	-76.0625	NA	1290	hydat	High
8185	BR_0002766	RIO RONCADOR	UHE MANSO RIO RONCADOR	BR	-15.0919	-55.4417	304	1360	ana	High
8189	IN_0000255	Subarnarekha	Muri	IN	23.3628	85.8747	231	1330	wris	High
8190	CA_0003508	LOON RIVER	ABOVE BRITTON LAKE	CA	56.0544395446777	-101.858329772949	NA	1400	hydat	High
8193	BR_0001678	RIO GRANDE	MANUEL DE MORAIS	BR	-22.0242	-42.1344	249	1370	ana	High
8194	US_0005780	LITTLE TALLAHATCHIE RIVER	AT ETTA, MS	US	34.4825	-89.2244444	83.21	1362.334	usgs	High
8197	BR_0001375	NA	RAUL SOARES	BR	-20.1	-42.4333	NA	1390	ana	High
8198	US_0002095	COOSAWATTEE RIVER	AT CARTERS, GA	US	34.60369697	-84.6954905	198.31	1349.384	usgs	High
8202	RU_0000274	TCHEREK	SOVETSKIY	RU	43.3	43.58	2500	1350	ewa	High
8204	US_0002560	GAULEY RIVER	NEAR CRAIGSVILLE, WV	US	38.29094494	-80.6409242	569.85	1370.104	usgs	High
8205	US_0002021	KINCHAFOONEE CREEK	AT PINEWOOD ROAD, NEAR DAWSON, GA	US	31.76444444	-84.2533333	64.54	1364.924	usgs	High
8206	BR_0002052	NA	NA	BR	-22.2864	-46.7656	NA	1290	ana	High
8207	CA_0004490	MURTLE RIVER	ABOVE DAWSON FALLS	CA	51.9794387817383	-120.103607177734	NA	1380	hydat	High
8208	US_0003815	TURTLE RIVER	AT MANVEL, ND	US	48.078595	-97.1845207	243.62	1440.033	usgs	Medium
8209	PA_0000005	SANTA MARIA (PANAMA)	SAN FRANCISCO	PA	8.2166	-80.9666	55	1370	grdb	High
8213	BR_0001744	RIO MISERICORDIA	NA	BR	-19.475	-46.5419	880	1370	ana	High
8216	BR_0001864	NA	NA	BR	-18.1047	-50.0314	NA	1360	ana	High
8218	CA_0000373	LITTLE PIC RIVER	NEAR COLDWELL	CA	48.8491096496582	-86.6072235107422	NA	1324.17	hydat	High
8219	CA_0003500	THYME HILL RIVER	BELOW MACKENZIE LAKE	CA	57.7694396972656	-102.730560302734	NA	1300	hydat	High
8222	BR_0001364	RIO DO CARMO	ACAIACA JUSANTE	BR	-20.3614	-43.1394	515	1370	ana	High
8226	CA_0000128	LITTLE SOUTHWEST MIRAMICHI RIVER	AT LYTTLETON	CA	46.9359703063965	-65.9073867797852	NA	1340	hydat	High
8227	CA_0000092	CASCAPEDIA PETITE RIVER	A SAINTEDGAR	CA	48.2308311462402	-65.7350006103516	NA	1340	hydat	High
8228	BR_0001185	RIO JAGUARIPE	NA	BR	-13.0308	-39.0322	29	1350	ana	High
8229	US_0000796	UNADILLA RIVER	AT ROCKDALE NY	US	42.37777778	-75.4061111	302.44	1346.794	usgs	High
8230	ES_0000295	ESLA	VILLOMAR	ES	42.5175	-5.37305555555556	804	1354	afd	High
8231	CA_0002532	BAPTISTE RIVER	NEAR THE MOUTH	CA	52.663818359375	-115.075782775879	NA	1346.5	hydat	High
8233	CA_0000004	ST FRANCIS RIVER	AT OUTLET OF GLASIER LAKE	CA	47.2066116333008	-68.9569396972656	NA	1350	hydat	High
8234	PA_0000002	CHIRIQUI	INTERAMERICANA	PA	8.4167	-82.35	10	1337	grdb	High
8236	BR_0001970	RIO VERDE	NA	BR	-22.1064	-45.0475	860	1340	ana	High
8238	MX_0000027	RIO PLACERES DEL ORO	PINZAN MORADO	MX	18.1606	-100.8792	610	1391	grdb	High
8241	BR_0001696	RIO CARANGOLA	PORCIUNCULA	BR	-20.9633	-42.0372	188	1340	ana	High
8244	BR_0001957	NA	NA	BR	-22.4142	-45.7914	850	1310	ana	High
8246	GB_0000226	SWALE	CRAKEHILL	GB	54.15	-1.35	NA	1363	grdb	High
8250	BR_0001459	RIO GUANDU	LARANJA DA TERRA	BR	-19.9011	-41.0581	164	1330	ana	High
8255	IE_0000038	SLANEY	ENNISCORTHY	IE	52.5	-6.56	NA	1277	ewa	High
8256	CR_0000028	REVENTAZON	ANGOSTURA	CR	9.87	-83.65	532	1337	grdb	High
8259	BR_0000836	RIO PARAOPEBA	JECEABA	BR	-20.5333	-43.9667	832	1340	ana	High
8260	CA_0000719	THAMES RIVER	NEAR EALING	CA	42.973560333252	-81.2085800170898	NA	1338.1	hydat	High
8261	PL_0000043	KANAL KOSCIANSKI	KOSCIAN	PL	52.117	16.633	64	1247	grdb	Medium
8262	BR_0002359	RIO IMBITUVA	LAJEADO	BR	-25.1994	-50.5247	780	1340	ana	High
8263	US_0000418	HOOSIC RIVER	NEAR EAGLE BRIDGE NY	US	42.9386111	-73.3769444	108.33	1320.894	usgs	High
8264	FI_0000092	IIJOKI	SUOLIJAERVI -OUTLET	FI	65.145	28.069	150	1313	grdb	High
8265	US_0002454	LITTLE BEAVER CREEK	NEAR EAST LIVERPOOL OH	US	40.6758974	-80.5406244	214.09	1284.634	usgs	High
8266	US_0000052	SANDY RIVER	NEAR MERCER, MAINE	US	44.70805556	-69.9375	60.08	1336.434	usgs	High
8267	BR_0003079	RIO JACUPIRANGA	INGATUBA	BR	-24.5933	-47.8789	20	1340	ana	High
8268	IN_0000190	Cauvery	Thengumarahada	IN	11.5728	76.9192	345	1370	wris	High
8270	FI_0000075	EURAJOKI	PAPPILANKOSKI	FI	61.203	21.754	15	1229	grdb	Medium
8271	BR_0000468	NA	PONTE RIO LONTRA	BR	-7.2075	-48.2958	194	1330	ana	High
8272	US_0002694	GREAT MIAMI RIVER	AT SIDNEY OH	US	40.2869942	-84.149943	281.54	1401.184	usgs	High
8273	BR_0000726	RIO CAPIBERIBE MIRIM	NA	BR	-7.5428	-35.0686	0	1320	ana	High
8274	US_0000044	DEAD RIVER	NEAR DEAD RIVER, MAINE	US	45.22905	-70.20112778	316.18	1336.434	usgs	High
8279	BR_0000423	RIO PIRANHAS	PIRANHAS	BR	-16.4306	-51.8164	NA	1360	ana	High
8281	BR_0002355	RIO TIBAGI	SANTA CRUZ	BR	-25.2	-50.1503	790	1340	ana	High
8286	TH_0000146	NAM PONG (E)	BAN KAE (SI CHOMPHU)	TH	16.8667	102.185	191.51	1260	grdb	High
8287	CA_0005464	DUNCAN RIVER	BELOW BB CREEK	CA	50.6375007629395	-117.048027038574	NA	1310	hydat	High
8288	US_0006082	CLEAR FK TRINITY RIVER	AT FT WORTH, TX	US	32.732353	-97.3589063	162.43	1341.614	usgs	High
8289	US_0002609	TUG FORK	AT LITWAR, WV	US	37.4856665	-81.84372729	285.41	1305.354	usgs	High
8291	MX_0000037	RIO CORONA	CORONA	MX	23.9417	-98.9481	147	1329	grdb	High
8296	BR_0000773	NA	QUEBRANGULO	BR	-9.3169	-36.4744	0	1340	ana	High
8298	FR_0000878	SEMOY	HAULME	FR	49.86	4.79	143.39	1340	ewa	High
8302	BR_0001279	NA	NA	BR	-16.6894	-41.4986	400	1350	ana	High
8303	BR_0003078	RIO JACUPIRANGA	BARRA DO CAPINZAL	BR	-24.6	-47.8833	20	1330	ana	High
8304	RU_0000355	SAMARA	NOVO-SERGIEVKA	RU	52.12	53.65	227	1340	ewa	High
8307	ES_0000176	LIMIA	LOVIOS (BUSCALQUE)	ES	41.8813888888889	-8.16611111111111	250	1302	afd	High
8311	CA_0003686	STEEPBANK RIVER	NEAR FORT MCMURRAY	CA	56.9994583129883	-111.406837463379	NA	1319.85	hydat	High
8315	US_0002296	PEARL RIVER	AT BURNSIDE, MS	US	32.84138889	-89.0977778	114.61	1346.794	usgs	High
8316	US_0000309	WESTFIELD RIVER	NEAR WESTFIELD, MA	US	42.1067602	-72.698981	29.95	1287.224	usgs	High
8319	US_0002210	CHUQUATONCHEE CREEK	NEAR WEST POINT, MS	US	33.6072222	-88.7091667	51.82	1307.944	usgs	High
8320	CA_0001093	NORD RIVER	DU A SAINTCANUT	CA	45.7222213745117	-74.084716796875	NA	1330	hydat	High
8323	US_0005612	LITTLE CANEY RIVER	BELOW COTTON CREEK NEAR COPAN, OK	US	36.89507859	-95.9694266	204.9	1300.174	usgs	High
8324	FI_0000093	KUIVAJOKI	RAVASKA	FI	65.619	25.291	30	1279	grdb	High
8325	US_0002639	BIG DARBY CREEK	AT DARBYVILLE OH	US	39.7006176	-83.110187	217.38	1383.054	usgs	High
8326	DE_0000057	JEETZEL	LUCHOW	DE	52.97	11.16	15.94	1325	ewa	High
8327	DE_0000351	NIED	NIEDALTDORF	DE	49.3423	6.5927	184.16	1337.4	grdb	High
8331	BR_0000755	RIO SIRINHAEM	ENGENHO MATO GROSSO	BR	-8.6375	-35.3056	100	1310	ana	High
8332	ZA_0000134	VLEKPOORTRIVIER	ROBERTS KRAAL (27673603)	ZA	-31.9683	26.0011	1111	1308	grdb	High
8333	CA_0001253	LASSOMPTION RIVER	AU PONTROUTE 158 A JOLIETTE	CA	46.0102806091309	-73.4274978637695	NA	1340	hydat	High
8335	CA_0001250	LASSOMPTION RIVER	A JOLIETTE NO1	CA	46.0122184753418	-73.4297180175781	NA	1340	hydat	High
8336	CA_0001252	LASSOMPTION RIVER	A JOLIETTE NO2	CA	46.0136108398438	-73.4313888549805	NA	1340	hydat	High
8337	BR_0001363	NA	ACAIACA	BR	-20.3625	-43.1431	NA	1330	ana	High
8339	FR_0000590	LOIRE	CHADRAC (LOIRE)	FR	45.07	3.91	NA	1310	ewa	High
8340	BR_0001535	NA	FAZENDA BARBOSA	BR	-23.1972	-46.0389	559	1290	ana	High
8341	BR_0003218	RIO PARDO	NA	BR	-29.6572	-52.7872	35.23	1340	ana	High
8344	BR_0000935	NA	PONTE DOS CIGANOS	BR	-16.4669	-44.3761	720	1310	ana	High
8345	TH_0000150	HUAI RAI	BAN NON KIANG	TH	16.1333	101.6667	218.5	1370	grdb	High
8346	CA_0004238	SOMASS RIVER	NEAR ALBERNI	CA	49.2852783203125	-124.866668701172	NA	1280	hydat	High
8347	US_0006066	ATTOYAC BAYOU	NEAR CHIRENO, TX	US	31.50434957	-94.3043677	51.69	1302.764	usgs	High
8350	RU_0000441	SOB'	HARP	RU	66.87	65.78	69.14	1240	arcticnet	High
8352	SK_0000039	TORYSA	KOSICKE OLSANY	SK	48.7326	21.3377	186	1298	grdb	High
8353	CN_0000018	NAN LA HE	MAN LA SA	CN	21.43333333	101.55	NA	1311	chdp	High
8355	IN_0000280	Periyar	Arangaly	IN	10.2814	76.3153	8.94	1342	wris	High
8357	BR_0001129	RIO ITAPICURU-MIRIM	JACOBINA	BR	-11.2114	-40.4703	434	1290	ana	High
8359	RU_0000352	KUTCHYUI	UTIASHKINO	RU	55.22	51.32	185	1330	ewa	High
8363	US_0006644	BLUE RIVER	ABOVE GREEN MOUNTAIN RESERVOIR, CO.	US	39.83193005	-106.2228033	2422.14	1323.484	usgs	High
8365	BR_0001247	RIO JEQUITINHONHA	MENDANHA - MONTANTE	BR	-18.1	-43.5	NA	1290	ana	High
8366	BR_0001248	RIO JEQUITINHONHA	MENDANHA	BR	-18.1	-43.5	698	1290	ana	High
8368	DK_0000032	GUDENA	TVILUMBRO	DK	56.24	9.67	NA	1290	grdb	High
8371	BR_0001743	RIO QUEBRA ANZOL	NA	BR	-19.5175	-46.57	852	1300	ana	High
8372	CA_0000468	STURGEON RIVER	AT UPPER GOOSE FALLS	CA	46.9702491760254	-80.4587783813477	NA	1200	hydat	Medium
8373	TH_0000171	HUAI BANG SAI	BAN NONG AEK BRIDGE	TH	16.64	104.7033	NA	1340	grdb	High
8374	FR_0000716	SIOULE	FADES-BESSERVE	FR	45.97	2.8	NA	1300	ewa	High
8375	CO_0000002	LA PLATA	VEGA EL SALADO	CO	2.38	-75.92	1320	1236	grdb	High
8379	BR_0001533	NA	NA	BR	-23.2125	-46.0694	562	1270	ana	High
8384	CA_0005229	SALMO RIVER	NEAR WANETA	CA	49.0302810668945	-117.373893737793	NA	1300	hydat	High
8385	RU_0000390	KAMPENDAY	KEMPENDAY	RU	62.02	118.63	169.42	1290	arcticnet	High
8393	IN_0000275	Bharathapuzha	Pudur	IN	10.78	76.575	69.35	1313	wris	High
8394	FR_0001162	SEILLE (TRIB. MOSELLE)	METZ	FR	49.0996	6.1872	206.88	1280	grdb	High
8397	BR_0001842	RIO DAS CALDAS	FAZENDA SUCURI	BR	-16.9136	-49.1047	NA	1290	ana	High
8399	US_0002047	PEA RIVER	NEAR ARITON AL	US	31.59488716	-85.7829975	75.2	1289.814	usgs	High
8400	TH_0000081	PASAK RIVER	BAN NA SOM	TH	15.2233	101.2808	NA	1247	game	High
8401	BR_0002166	RIO CAPIVARI	FAZENDA ITAPEVA	BR	-23.0175	-47.5769	NA	1310	ana	High
8403	US_0006388	COLETO CREEK	NEAR VICTORIA, TX	US	28.73110317	-97.1386004	13.47	1294.994	usgs	High
8404	BR_0002129	NA	RIO ABAIXO	BR	-23.52	-46.2992	725	1190	ana	Medium
8406	AR_0000042	CHUBUT	EL MAITEN	AR	-42.1	-71.17	680	1200	grdb	Medium
8408	ES_0001179	TIRON	HARO	ES	42.58	-2.87583333333333	458	1239	afd	High
8410	TH_0000148	HUAI PHANIANG	BAN WANG MUN	TH	17.1817	102.435	94	1260	grdb	High
8411	US_0004694	REDWATER CREEK	AT WY-SD STATE LINE	US	44.5719044	-104.0535508	1039.57	1240.604	usgs	High
8414	US_0002312	BOGUE CHITTO	NEAR TYLERTOWN, MS	US	31.17694444	-90.2794444	69.31	1274.274	usgs	High
8416	FR_0000254	OGNON (TRIB. RHONE)	BEAUMOTTE-AUBERTANS	FR	47.415	6.1803	275.79	1250	grdb	High
8418	BR_0003247	RIO CARREIRO	PASSO MIGLIAVACA	BR	-28.6189	-51.8558	480	1330	ana	High
8419	BR_0002741	RIO JAUQUARA	JAUQUARA	BR	-15.1669	-57.0839	125	1310	ana	High
8421	CA_0003951	ISKUT RIVER	AT OUTLET OF KINASKAN LAKE	CA	57.5305595397949	-130.179168701172	NA	1250	hydat	High
8423	ZA_0000121	HEUNINGKLIPRIVIER	CAMPHERSPOORT (27691501)	ZA	-33.2036	24.2342	500	1296	grdb	High
8424	US_0002707	MAD RIVER	NEAR SPRINGFIELD OH	US	39.92311527	-83.8702081	268.56	1269.094	usgs	High
8425	TH_0000180	WANG RIVER	BAN HAI	TH	18.8033	99.6458	NA	1284	game	High
8428	CA_0000542	NOTTAWASAGA RIVER	NEAR BAXTER	CA	44.2498092651367	-79.821418762207	NA	1230.58	hydat	High
8430	TJ_0000001	VARZOB	DAGANA-ATA	TJ	38.76	68.75	969	1270	grdb	High
8431	BR_0003062	NA	PEDRO BARROS	BR	-24.2617	-47.3733	31	1260	ana	High
8435	US_0002069	CONECUH RIVER	AT BRANTLEY AL	US	31.57349458	-86.2516226	68.95	1294.994	usgs	High
8440	BR_0001411	RIO DO TANQUE	FAZENDA BARRACA	BR	-19.3319	-43.0703	482	1260	ana	High
8441	BR_0000652	RIO SALGADO	NA	BR	-7.2222	-39.1439	350	1260	ana	High
8444	TH_0000176	MAE LOEI	WANG SAPHUNG	TH	17.2983	101.78	234	1240	grdb	High
8448	MX_0000039	RIO LOS HULES	LOS HULES	MX	21.1667	-98.2665	91	1269	grdb	High
8449	US_0002228	MULBERRY FORK	NEAR ARKADELPHIA, AL.	US	33.87204689	-86.9222211	82.37	1261.324	usgs	High
8450	CA_0001251	QUAREAU RIVER	A RAWDON	CA	46.040828704834	-73.7174987792969	NA	1260	hydat	High
8451	BR_0002931	RIO COMANDAI	NA	BR	-27.9308	-54.9392	125	1260	ana	High
8453	AT_0000147	TRAUN (TRIB. DANUBE)	EBENSEE	AT	47.8061	13.7675	422.98	1257.6	grdb	High
8454	CA_0003056	SHELL RIVER	NEAR ROBLIN	CA	51.3619194030762	-101.256217956543	NA	1320	hydat	High
8455	IE_0000070	BLACKWATER (MUNSTER)	KILLAVULLEN	IE	52.1446	-8.5163	NA	1256.7	grdb	High
8456	BR_0001874	RIO DOCE	PONTE RIO DOCE	BR	-17.8608	-51.39	NA	1280	ana	High
8457	BR_0001747	RIO CAPIVARA	PONTE DA ANTINHA	BR	-19.3167	-47.0333	835	1270	ana	High
8458	GB_0000093	MEDWAY	TESTON	GB	51.25	0.448	7	1256.1	grdb	High
8460	BR_0002051	NA	USINA PINHAL	BR	-22.2586	-46.7164	700	1300	ana	High
8461	ES_0000967	SEGRE	SEO DE URGEL	ES	42.3536111111111	1.46083333333333	670	1233	afd	High
8463	CA_0000429	AUX SABLES RIVER	AT MASSEY	CA	46.2149391174316	-82.0708084106445	NA	1338.6	hydat	High
8464	PL_0000060	PROSNA	MIRKOW	PL	51.32	18.15	145	1255	grdb	High
8469	ES_0000472	ALGODOR	VILLAMEJOR	ES	39.9094444444444	-3.86777777777778	465	1266	afd	High
8471	MY_0000021	LANGAT	DINGKIL	MY	2.85	101.68	7	1240	grdb	High
8476	CA_0001254	OUAREAU RIVER	A LA CENTRALE DE RAWDON	CA	46.045280456543	-73.730827331543	NA	1260	hydat	High
8477	CA_0003661	FAWCETT RIVER	AT OUTLET OF FAWCETT LAKE	CA	55.3199005126953	-114.055313110352	NA	1244.05	hydat	High
8478	CA_0004412	MORKILL RIVER	BELOW HELLROARING CREEK	CA	53.6816711425781	-120.59139251709	NA	1260	hydat	High
8479	CZ_0000020	BECVA	TEPLICE	CZ	49.53	17.75	242	1275	grdb	High
8480	FR_0000447	LOT	LA MOTHE	FR	44.44	3.19	518.2	1160	ewa	Medium
8481	CA_0003788	REDWILLOW RIVER	NEAR RIO GRANDE	CA	55.0788192749023	-119.70157623291	NA	1248.6	hydat	High
8482	CA_0000896	BURNT RIVER	NEAR BURNT RIVER	CA	44.7098617553711	-78.6775283813477	NA	1251.74	hydat	High
8485	US_0004771	MAPLE RIVER	AT ND-SD STATE LINE	US	45.93886156	-98.4526004	416.06	1256.144	usgs	High
8487	US_0006364	GUADALUPE RIVER	AT KERRVILLE, TX	US	30.053266	-99.163375	487.99	1320.894	usgs	High
8488	RU_0000353	MALY TCHEREMSHAN	ABALDUEVKA	RU	54.95	50.27	144	1230	ewa	High
8493	US_0002146	CHOCCOLOCCO CREEK	AT JACKSON SHOAL NEAR LINCOLN AL	US	33.5484383	-86.0969163	136.7	1245.784	usgs	High
8495	CA_0001126	PETITE NATION RIVER	DE LA AU PONT A 16 KM EN AMONT DE RIPON	CA	45.7916717529297	-75.0913925170898	NA	1330	hydat	High
8496	BR_0000138	RIO BRANCO	PCH ALTA FLORESTA MONTANTE	BR	-11.9167	-62.0833	NA	1280	ana	High
8500	BR_0002009	RIO DO CARMO	NA	BR	-20.1667	-47.8833	NA	1260	ana	High
8502	CA_0000289	LAHAVE RIVER	AT WEST NORTHFIELD	CA	44.4474411010742	-64.5911865234375	NA	1250	hydat	High
8503	CA_0000417	LITTLE WHITE RIVER	BELOW BOLAND RIVER	CA	46.5811386108398	-82.9680023193359	NA	1205.15	hydat	High
8504	BR_0002256	NA	NA	BR	-18.5497	-53.1325	530	1250	ana	High
8505	US_0006455	LOS OLMOS CREEK	NEAR FALFURRIAS, TX	US	27.26448618	-98.1358378	35.53	1232.834	usgs	High
8506	DE_0000039	PLEISSE	BOEHLEN 1	DE	51.2006	12.3862	121.2	1359	grdb	Medium
8508	CA_0006026	WRIGLEY RIVER	NEAR THE MOUTH	CA	63.1761093139648	-123.690277099609	NA	1230	hydat	High
8510	ES_0000737	GUADAIRA	PUENTE SIFON	ES	37.3625	-5.90277777777778	16	1239	afd	High
8513	CA_0000418	SERPENT RIVER	AT HIGHWAY NO 17	CA	46.2107810974121	-82.5124206542969	NA	1354.24	hydat	Medium
8517	BR_0001317	NA	CRISTAL	BR	-18.0908	-40.1142	75	1280	ana	High
8518	FR_0001176	ORNE	ROSSELANGE	FR	49.26	6.07	NA	1230	ewa	High
8520	RU_0000265	BEREZOVAYA	ANTONOVKA	RU	48.63	41.37	130	1260	ewa	High
8521	CA_0006011	JEANMARIE RIVER	AT HIGHWAY NO 1	CA	61.4455299377441	-121.238189697266	NA	1310	hydat	Medium
8522	BR_0001621	NA	MATIAS BARBOSA	BR	-21.8714	-43.3242	478	1210	ana	High
8523	US_0002496	KILLBUCK CREEK	AT KILLBUCK OH	US	40.48145387	-81.985979	239.94	1201.754	usgs	High
8524	US_0004545	TONGUE RIVER	AT MONARCH, WY	US	44.9002493	-107.020905	1103.39	1238.014	usgs	High
8527	BR_0000631	RIO JAIBARAS	FAZENDA TIMBURANA	BR	-3.7667	-40.45	80	1230	ana	High
8528	ES_0000933	CABRIEL	VILLORA	ES	39.7397222222222	-1.63361111111111	797	1255	afd	High
8532	SK_0000041	POPRAD	CHMELNICA	SK	49.289	20.732	507	1262	grdb	High
8535	FR_0000313	CREUSE	FRESSELINES	FR	46.3775	1.6786	265.63	1235	grdb	High
8536	BR_0002050	NA	NA	BR	-22.2667	-46.7	NA	1260	ana	High
8543	CA_0005255	SALMO RIVER	NEAR SALMO	CA	49.0471382141113	-117.294288635254	NA	1240	hydat	High
8545	US_0006363	GUADALUPE RIVER ABOVE BEAR CREEK	AT KERRVILLE, TX	US	30.06965378	-99.1953203	494.76	1279.454	usgs	High
8546	BR_0001845	RIO DOS DOURADOS	PROFESSOR JAMIL	BR	-17.2536	-49.275	NA	1250	ana	High
8547	BR_0000815	RIO LAMBARI	NA	BR	-19.9333	-45.1333	713	1250	ana	High
8548	ES_0001071	NOGUERA RIBAGORZANA	CORSA	ES	42.0288888888889	0.655277777777778	506	1212	afd	High
8550	DZ_0000006	ISSER (TRIB. TAFNA)	BENSEKRANE	DZ	35.07	-1.22	287	1118	grdb	Medium
8552	FR_0000436	CELE	LES AMIS DU CELE	FR	44.52	1.69	136.42	1190	ewa	High
8554	US_0005853	LITTLE WICHITA RIVER	NEAR ARCHER CITY, TX	US	33.66260225	-98.6131124	284.91	1245.784	usgs	High
8555	CA_0000372	STEEL RIVER	NEAR TERRACE BAY	CA	48.7777786254883	-86.8844375610352	NA	1190	hydat	High
8556	CA_0003071	LITTLE SASKATCHEWAN RIVER	AT ELPHINSTONE	CA	50.5319404602051	-100.294441223145	NA	1160	hydat	Medium
8557	RU_0000181	PISSA	ZELENY BOR	RU	54.65	21.97	NA	1360	ewa	Medium
8560	US_0006212	CALIFORNIA CREEK	NEAR STAMFORD, TX	US	32.93094435	-99.642588	448.06	1238.014	usgs	High
8563	BR_0000728	NA	ENGENHO ITAPISSIRICA	BR	-7.6131	-35.0647	21	1230	ana	High
8565	AF_0000014	BUM RIVER	LUKA-I-SURKH	AF	35.2333	63.4667	594	1225	grdb	High
8568	CA_0003926	SEKULMUN RIVER	AT OUTLET OF SEKULMUN LAKE	CA	61.5604400634766	-137.537384033203	NA	1240	hydat	High
8569	BR_0001885	NA	BARRA DO PRATA	BR	-18.845	-52.2131	701	1200	ana	High
8570	US_0007202	MALAD RIVER	AT WOODRUFF ID	US	42.0299229	-112.2299625	1327.42	1222.474	usgs	High
8574	LT_0000004	MINIJA	KARTENA	LT	55.921	21.477	18	1220	grdb	High
8575	BR_0002425	NA	NA	BR	-23.3331	-51.8497	400	1240	ana	High
8578	BE_0000010	SEMOIS	MEMBRE	BE	49.86	4.9	176.02	1235	ewa	High
8579	CA_0002132	BELLY RIVER	NEAR STAND OFF	CA	49.4777793884277	-113.302780151367	NA	1210	hydat	High
8581	CA_0004135	ELAHO RIVER	NEAR THE MOUTH	CA	50.1140289306641	-123.428398132324	NA	1200	hydat	High
8582	US_0000078	OSSIPEE RIVER	AT CORNISH, ME	US	43.8077083	-70.79757778	84.16	1170.675	usgs	High
8583	GB_0000009	DON (SCOTLAND)	PARKHILL	GB	57.2176	-2.1887	32.4	1273	grdb	High
8584	US_0006535	JEMEZ RIVER	NEAR JEMEZ, NM	US	35.6619833	-106.7434389	1713.61	1217.294	usgs	High
8585	RU_0000338	BIR	MALUKHOIAZOVO	RU	55.38	55.85	180	1210	ewa	High
8588	IE_0000064	SLANE	ENNISCORTHY	IE	52.548	-6.566	NA	1319.9	grdb	Medium
8590	DE_0000225	PAAR	MANCHING EISENBAHNBR.	DE	48.73	11.5	363.32	1187	ewa	High
8591	BY_0000010	VILIYA	STESHITSI	BY	54.57	27.4	159.06	1230	ewa	High
8592	CA_0001124	PETITE NATION RIVER	DE LA PRES DE COTESAINTPIERRE	CA	45.8274993896484	-75.0716705322266	NA	1300	hydat	Medium
8593	CA_0001150	PICANOC RIVER	PRES DE WRIGHT	CA	46.0774993896484	-76.0694427490234	NA	1290	hydat	Medium
8594	CA_0001158	PICANOC RIVER	SUR LE CHEMIN DU CAYAMAN A GRACEFIELD	CA	46.0779418945312	-76.0694122314453	NA	1290	hydat	Medium
8598	CA_0005015	CHILLIWACK RIVER	AT VEDDER CROSSING	CA	49.0973815917969	-121.967483520508	NA	1230	hydat	High
8600	BR_0000756	RIO UNA	CACHOEIRINHA	BR	-8.4839	-36.2331	531.33	1210	ana	High
8603	US_0001900	WITHLACOOCHEE RIVER	AT MCMILLAN RD,NEAR BEMISS, GA	US	30.9526998	-83.2684865	36.67	1300.174	usgs	Medium
8604	US_0008569	SNAKE RIVER ABOVE JACKSON LAKE	AT FLAGG RANCH WY	US	44.09888889	-110.6675	2073.16	1258.734	usgs	High
8607	US_0006512	RIVER CHAMA	NEAR LA PUENTE, NM	US	36.6626583	-106.6333667	2158.92	1243.194	usgs	High
8608	IN_0000268	Muvattupuzha	Ramamangalam	IN	9.9406	76.4744	8.85	1342	wris	Medium
8609	CA_0001511	MADELEINE RIVER	A RIVERLAMADELEINE	CA	49.2027816772461	-65.2955627441406	NA	1200	hydat	High
8611	CA_0006072	BLACKSTONE RIVER	NEAR CHAPMAN LAKE AIRSTRIP	CA	64.9013900756836	-138.275833129883	NA	1180	hydat	High
8613	US_0002280	BUCKATUNNA CREEK	NEAR DENHAM, MS	US	31.69416667	-88.5191667	43.02	1274.274	usgs	High
8615	BR_0002769	RIO QUILOMBO	NA	BR	-15.1133	-55.6775	NA	1240	ana	High
8620	IE_0000055	BROSNA	MOYSTOWN	IE	53.2383	-7.9317	NA	1180.2	grdb	High
8621	US_0005892	BLUE RIVER	NEAR BLUE, OK	US	33.99704088	-96.2410985	153.5	1235.424	usgs	High
8623	US_0006381	PEACH CREEK	BELOW DILWORTH, TX	US	29.47412787	-97.3166565	65.08	1191.395	usgs	High
8624	CA_0002192	ST MARY RIVER	AT INTERNATIONAL BOUNDARY	CA	49.0120582580566	-113.299560546875	NA	1206.4	hydat	High
8627	CA_0000375	STEEL RIVER	BELOW SANTOY LAKE	CA	48.8137092590332	-86.8593368530273	NA	1187	hydat	High
8628	RU_0000293	UNITSA	LOPATNIA	RU	52.83	32.13	181	1180	ewa	High
8629	US_0006237	LEON RIVER	NEAR DE LEON, TX	US	32.1737502	-98.5331058	368.79	1240.604	usgs	High
8630	FR_0001138	MOSELLE RIVER	EPINAL	FR	48.1646	6.4521	369.2	1220	grdb	High
8634	CA_0000758	SYDENHAM RIVER	NEAR DRESDEN	CA	42.5938911437988	-82.1086120605469	NA	1240	hydat	High
8635	SZ_0000020	NGWAVUMA	NSOKO (68632108)	SZ	-27.0708	31.8417	NA	1241	grdb	High
8636	CA_0002366	HIGHWOOD RIVER	AT BROWNS RANCH	CA	50.5288887023926	-114.23722076416	NA	1200	hydat	High
8637	CA_0000391	BATCHAWANA RIVER	NEAR BATCHAWANA	CA	47.0035285949707	-84.5155563354492	NA	1227.64	hydat	High
8639	CA_0005383	GOAT RIVER	NEAR ERICKSON	CA	49.089168548584	-116.455558776855	NA	1180	hydat	High
8642	US_0006427	SAN CASIMIRO CREEK	NEAR FREER, TX	US	27.96501329	-98.9669678	90.83	1214.704	usgs	High
8643	US_0002072	SEPULGA RIVER	NEAR MCKENZIE AL	US	31.4537758	-86.7869139	47.54	1217.294	usgs	High
8644	CA_0005177	ILLECILLEWAET RIVER	NEAR REVELSTOKE	CA	50.9858283996582	-118.181671142578	NA	1230	hydat	High
8645	CA_0000025	MEDUXNEKEAG RIVER	NEAR BELLEVILLE	CA	46.2162208557129	-67.7279434204102	NA	1210	hydat	High
8647	BR_0002005	NA	USINA MARAMBAIA	BR	-20.7936	-46.7125	NA	1220	ana	High
8650	RU_0000203	PASHA	PORETCHJE	RU	59.92	34.1	169	1110	ewa	Medium
8653	BR_0001032	NA	NA	BR	-13.1664	-44.6683	551	1300	ana	Medium
8654	BR_0003161	NA	BRUSQUE (PCD)	BR	-27.1006	-48.9167	21	1240	ana	High
8655	ES_0000216	ARLANZA	COVARRUBIAS	ES	42.055	-3.5075	881	1200	afd	High
8657	IT_0000137	TOPINO	P.TE_BETTONA	IT	43.02	12.48	NA	1220	ewa	High
8659	FR_0000914	THERAIN	MAYSEL	FR	49.28	2.38	NA	1200	ewa	High
8660	CA_0001736	BAY DU NORD RIVER	AT BIG FALLS	CA	47.7468299865723	-55.4402198791504	NA	1170	hydat	High
8663	SZ_0000026	USUSHWANA	MATSAPHA BRIDGE (68632202)	SZ	-26.4936	31.2994	NA	1164	grdb	High
8664	US_0000917	CONESTOGA RIVER	AT CONESTOGA, PA	US	39.9464886	-76.3677388	55	1217.294	usgs	High
8669	BR_0001221	RIO ALMADA	NA	BR	-14.6333	-39.2	45	1190	ana	High
8670	RU_0000275	BELKA	GUDERMES	RU	43.35	46.08	790	1190	ewa	High
8671	US_0000341	HOUSATONIC RIVER	NEAR ASHLEY FALLS, MA	US	42.0748138	-73.33344858	NA	1204.344	usgs	High
8673	BR_0002967	RIO CACEQUI	NA	BR	-30.1056	-54.6375	100	1220	ana	High
8674	US_0005707	LITTLE RIVER	NEAR TECUMSEH, OK	US	35.17257416	-96.9319662	273.87	1199.164	usgs	High
8676	BR_0000769	RIO CARURU	NA	BR	-9.0042	-36.0511	256.54	1170	ana	High
8678	US_0005657	BIG CABIN CREEK	NEAR BIG CABIN, OK	US	36.56841789	-95.1521891	189.59	1165.495	usgs	High
8679	BR_0001033	NA	FAZENDA PORTO BONITO	BR	-13.1719	-44.6828	NA	1290	ana	Medium
8680	BR_0002447	RIO GUIRAI	FAZENDA JANGADA	BR	-22.5456	-54.025	288	1190	ana	High
8683	BR_0002966	RIO CACEQUI	NA	BR	-30.1	-54.6333	100	1230	ana	High
8687	ES_0000770	SEGURA	FUENSANTA (DESEMBALSE)	ES	38.3927777777778	-2.20777777777778	530	1218	afd	High
8688	BR_0000466	RIO GENIPAPO	ARAPOEMA	BR	-7.6136	-49.0453	167	1150	ana	High
8693	BR_0000412	RIO ARAGUAINHA	ARAGUAINHA	BR	-16.8569	-53.0378	488	1200	ana	High
8695	BR_0002372	NA	NA	BR	-24.7667	-50.0667	975	1220	ana	High
8699	US_0006282	ELM CREEK	AT BALLINGER, TX	US	31.74931697	-99.9478636	493.09	1165.495	usgs	High
8701	NO_0000131	RAUMA	HORGHEIM	NO	62.47412	7.782354	60	1142	ewa	High
8705	ES_0000766	CUZNA O GUALDAMELLATO	GUADALMELLATO	ES	38.0430555555556	-4.67333333333333	212	1210	afd	High
8707	CA_0005857	WEST KETTLE RIVER	BELOW CARMI CREEK	CA	49.4841690063477	-119.108329772949	NA	1170	hydat	High
8708	CA_0000054	KENNEBECASIS RIVER	AT NORTON	CA	45.6358299255371	-65.7016677856445	NA	1210	hydat	High
8714	FR_0000355	TARDOIRE	COULGENS	FR	45.81	0.3	67.71	1200	ewa	High
8716	BR_0000876	NA	MAJOR PORTO	BR	-18.7064	-46.0397	672	1200	ana	High
8720	DE_0000694	EDER	SCHMITTLOTHEIM	DE	51.1557	8.8982	245.87	1202	grdb	High
8722	US_0000019	MACHIAS RIVER	AT WHITNEYVILLE, MAINE	US	44.72305556	-67.5205556	11.34	1186.215	usgs	High
8724	US_0006149	W FK SAN JACINTO RIVER	BELOW LK CONROE NEAR CONROE, TX	US	30.34215289	-95.542998	35.38	1168.085	usgs	High
8726	ES_0000439	MANZANARES	VACIAMADRID	ES	40.325	-3.55361111111111	535	1240	afd	High
8727	CA_0002351	ELBOW RIVER	BELOW GLENMORE DAM	CA	51.0127906799316	-114.093200683594	NA	1235.7	hydat	High
8730	BR_0001272	RIO GRAVATA	NA	BR	-16.9711	-42.1156	350	1180	ana	High
8732	CA_0002072	WILLOW CREEK	NEAR CLARESHOLM	CA	50.0185203552246	-113.71484375	NA	1180.6	hydat	High
8733	BR_0001452	NA	MUTUM	BR	-19.8181	-41.4344	NA	1180	ana	High
8734	BR_0001453	NA	MUTUM	BR	-19.8106	-41.4375	250	1180	ana	High
8735	CA_0004794	GUICHON CREEK	NEAR LOWER NICOLA	CA	50.1494407653809	-120.877777099609	NA	1230	hydat	High
8736	CA_0004846	GUICHON CREEK	AT THE MOUTH	CA	50.145881652832	-120.882270812988	NA	1230	hydat	High
8739	CA_0005972	TROUT RIVER	AT KILOMETRE 7837 ALASKA HIGHWAY	CA	59.3359718322754	-125.940246582031	NA	1170	hydat	High
8741	CA_0002012	MATTAWISHKWIA RIVER	AT HEARST	CA	49.6827812194824	-83.6555633544922	NA	1169.9	hydat	High
8744	US_0004709	HORSE CREEK	ABOVE VALE,SD	US	44.65265259	-103.366697	826.02	1191.395	usgs	High
8745	US_0002062	SHOAL RIVER	NEAR CRESTVIEW, FLA.	US	30.69741268	-86.570786	14.39	1227.654	usgs	High
8747	FR_0000273	DOUBS	COURCLAVON	FR	47.34	7.03	416.54	1240	ewa	Medium
8748	CA_0002354	ELBOW RIVER	ABOVE GLENMORE DAM	CA	51	-114.099998474121	NA	1220	hydat	High
8749	US_0006242	COWHOUSE CREEK	AT PIDCOKE, TX	US	31.2848902	-97.8850244	224.55	1178.445	usgs	High
8750	FR_0000957	GRAND MORIN	MONTRY	FR	48.88	2.85	NA	1190	ewa	High
8751	US_0004677	RAPID CREEK	BELOW SEWAGE TREATMENT PL NEAR RAPID CITY, SD	US	44.0236549	-103.095844	914.61	1181.035	usgs	High
8756	ZW_0000034	SHAWANHOHWE	MUTOKO ROAD BRIDGE (63315506)	ZW	-17.6333	31.6	NA	1194	grdb	High
8757	FI_0000108	KEMIJOKI	UNARI - OUTLET	FI	67.131	25.747	180	1198	grdb	High
8759	US_0002522	HUGHES RIVER	AT CISCO, WV	US	39.11868976	-81.2773386	185.3	1173.265	usgs	High
8762	CA_0001778	NA	CHIBOUGAMAU RIVER	CA	49.7586097717285	-74.4261093139648	NA	1170	hydat	High
8765	US_0008583	GREYS RIVER	ABOVE RESERVOIR NEAR ALPINE WY	US	43.14305556	-110.9769444	1746.22	1160.315	usgs	High
8766	TH_0000009	NAN RIVER	BAN MON	TH	19.4094	100.8681	NA	1156	game	High
8767	BR_0001892	RIO GRANDE	SANTANA DO GARAMBEU	BR	-21.6	-44.1	NA	1180	ana	High
8771	CA_0000541	NOTTAWASAGA RIVER	NEAR NICOLSTON	CA	44.1961097717285	-79.8016662597656	NA	1080	hydat	Medium
8772	SI_0000005	SAVINJA	CELJE 2 - BRV	SI	46.227	15.261	230	1189	grdb	High
8773	BR_0001469	RIO PANCAS	CACHOEIRA DO OITO	BR	-19.4333	-40.6167	NA	1160	ana	High
8774	US_0004719	MEDICINE KNOLL CREEK	NEAR BLUNT SD	US	44.5627602	-99.9142868	491.06	1090.385	usgs	Medium
8777	FR_0000759	VIENNE	ST PRIEST TAURION	FR	45.88	1.4	NA	1160	ewa	High
8778	NZ_0000006	RANGITAIKI	MURUPARA	NZ	-38.4601	176.6995	187	1184	grdb	High
8780	CA_0001716	TERRA NOVA RIVER	AT EIGHT MILE BRIDGES	CA	48.4416694641113	-54.372501373291	NA	1290	hydat	Medium
8781	CA_0004527	BARRIERE RIVER	AT THE MOUTH	CA	51.1779098510742	-120.13410949707	NA	1140	hydat	High
8783	US_0002525	HOCKING RIVER	AT ENTERPRISE OH	US	39.5650661	-82.4746008	220.43	1188.805	usgs	High
8784	ES_0001120	ALHAMA	CINTRUENIGO	ES	42.0811111111111	-1.81055555555556	379	1120	afd	High
8785	FR_0000808	CURE	ARCY SUR CURE	FR	47.6	3.76	121.38	1180	ewa	High
8786	FR_0000191	SAONE	CENDRECOURT	FR	47.86	5.93	216.53	1130	ewa	High
8789	CA_0003803	WASKAHIGAN RIVER	NEAR THE MOUTH	CA	54.752010345459	-117.205703735352	NA	1040	hydat	Medium
8794	GB_0000129	TEME	TENBURY	GB	52.314	-2.591	48	1134.4	grdb	High
8796	BR_0002371	NA	CASTRO	BR	-24.7817	-50.0058	990	1190	ana	High
8798	US_0003635	CATTARAUGUS CREEK	AT GOWANDA NY	US	42.4633333	-78.9341667	225.2	1129.235	usgs	High
8800	US_0004195	SUGAR CREEK	AT MILFORD, IL	US	40.6300362	-87.72391809	189.59	1155.135	usgs	High
8802	PA_0000003	TABASARA	CAMARON	PA	8.0666	-81.6333	15	1149	grdb	High
8805	CA_0001410	MONTMORENCY RIVER	A 06 KM EN AVAL DU BARRAGE DES MARCHES NATURELLES	CA	46.8941688537598	-71.1513900756836	NA	1100	hydat	High
8811	BR_0001858	RIO VERDINHO	NA	BR	-17.4658	-50.7742	NA	1170	ana	High
8813	CA_0005169	BEAVER RIVER	NEAR THE MOUTH	CA	51.509090423584	-117.465301513672	NA	1150	hydat	High
8816	CA_0005185	ILLECILLEWAET RIVER	AT GREELEY	CA	51.0126304626465	-118.085136413574	NA	1150	hydat	High
8819	US_0002302	YOCKANOOKANY RIVER	NEAR OFAHOMA, MS	US	32.7061111	-89.6719444	93.32	1214.704	usgs	High
8820	CA_0000011	GREEN RIVER	NEAR RIVERVERTE	CA	47.3349990844727	-68.1350021362305	NA	1150	hydat	High
8822	DE_0000402	WERRA	MEININGEN	DE	50.5704	10.4172	281.66	1170	grdb	High
8823	IN_0000068	Godavari	Potteru	IN	18.1889	81.7978	132	1120	wris	High
8826	BR_0001271	RIO GRAVATA	NA	BR	-17.0333	-42.1167	335	1150	ana	High
8828	CA_0000084	NOUVELLE RIVER	AU PONT	CA	48.1572189331055	-66.3494415283203	NA	1140	hydat	High
8829	CA_0000085	NOUVELLE RIVER	A 02 KM EN AMONT DU PONTROUTE 132 A NOUVELLE	CA	48.1587982177734	-66.3488006591797	NA	1139	hydat	High
8830	CA_0003560	ROCKY RIVER	AT HAWES	CA	53.1402816772461	-117.979438781738	NA	1140	hydat	High
8836	BR_0001140	NA	CAMBUIS	BR	-12.1333	-37.9667	61	1200	ana	High
8837	BR_0001141	NA	JANGADO	BR	-12.1292	-37.9414	61	1200	ana	High
8839	RU_0000313	USHNA	NOVLIANSKAYA	RU	55.8	41.73	140	1140	ewa	High
8841	CA_0000392	GOULAIS RIVER	NEAR SEARCHMONT	CA	46.8609390258789	-83.971809387207	NA	1138.67	hydat	High
8843	CA_0001100	NORD RIVER	DU A 48 KM EN AMONT DU PONT DU CN A SAINTJEROME	CA	45.7930603027344	-74.0127792358398	NA	1170	hydat	High
8849	BR_0002567	NA	PONTE DO UMBARAZINHO	BR	-25.5986	-49.2592	879	1160	ana	High
8853	CA_0004311	CAMPBELL RIVER	NEAR QUINSAM	CA	49.9650001525879	-125.586112976074	NA	1150	hydat	High
8854	ZA_0000262	KLEIN-MARICORIVIER	LITTLE-MARICOPOOERT (27548001)	ZA	-25.5381	26.1036	1171	1180	grdb	High
8860	BR_0002526	NA	NA	BR	-24.3831	-54.1831	545	1130	ana	High
8862	CA_0002033	CASTLE RIVER	NEAR COWLEY	CA	49.5333290100098	-114.033332824707	NA	1120	hydat	High
8863	GB_0000162	RIBBLE	SAMLESBURY	GB	53.777	-2.627	9.5	1145	grdb	High
8864	ES_0000093	TAMBRE	PORTOMOURO	ES	42.9602777777778	-8.64472222222222	161	1146	afd	High
8866	ES_0000334	DURATON	VENCIAS, LAS	ES	41.4352777777778	-3.96611111111111	809	1125	afd	High
8871	CA_0003443	KETTLE RIVER	NEAR GILLAM	CA	56.3415603637695	-94.696647644043	NA	1090	hydat	High
8872	DE_0000376	RHUME	ELVESHAUSEN	DE	51.71	10.09	128.41	1119	ewa	High
8874	BR_0002848	RIO PELOTINHAS	UHE BARRA GRANDE PELOTINHAS	BR	-28.2883	-50.6431	719	1150	ana	High
8875	CA_0002357	ELBOW RIVER	AT SARCEE BRIDGE	CA	50.9946403503418	-114.164817810059	NA	1189.3	hydat	High
8879	CA_0001451	ETCHEMIN RIVER	AU PONTROUTE 173 A SAINTHENRIDELEVIS	CA	46.6911087036133	-71.0688934326172	NA	1160	hydat	High
8881	BR_0002198	RIO ATIBAIA	ATIBAIA	BR	-23.1053	-46.5558	NA	1143	ana	High
8882	BR_0002199	RIO ATIBAIA	ATIBAIA	BR	-23.105	-46.5564	752	1140	ana	High
8888	FR_0000990	OISE	ORIGNY-SAINTE-BENOITE	FR	49.84	3.48	NA	1170	ewa	High
8890	CA_0003665	WANDERING RIVER	NEAR WANDERING RIVER	CA	55.1994781494141	-112.46736907959	NA	1120.4	hydat	High
8892	FR_0000090	DROME	SAILLANS	FR	44.69	5.21	266.04	1150	ewa	High
8893	CR_0000024	COTO BRUS	CARACUCHO	CR	9	-83.2	98	1131	grdb	High
8894	BR_0002927	RIO SANTA ROSA	TUCUNDUVA	BR	-27.6742	-54.4625	120	1140	ana	High
8895	FR_0001126	NIED	BOUZONVILLE	FR	49.3	6.54	191.9	1160	ewa	High
8897	US_0005165	DELAWARE RIVER	NEAR MUSCOTAH, KS	US	39.5213873	-95.532756	280.69	1116.285	usgs	High
8899	US_0005611	CANEY RIVER	NEAR ELGIN, KS	US	37.00393886	-96.3166638	232.66	1152.545	usgs	High
8901	CA_0000754	SYDENHAM RIVER	AT FLORENCE	CA	42.6506118774414	-82.0083923339844	NA	1149.32	hydat	High
8902	BR_0002055	RIO DO PEIXE	NA	BR	-22.5219	-46.6472	680	1140	ana	High
8903	CA_0001454	CHAUDIERE RIVER	EN AVAL DU RUISSEAU DROLET	CA	45.6916694641113	-70.7858276367188	NA	1170	hydat	High
8905	US_0005829	SWEETWATER CREEK	NEAR SWEETWATER, OK	US	35.42227237	-99.9692772	636.36	1061.895	usgs	Medium
8909	BR_0001238	RIO CATOLE GRANDE	NA	BR	-14.9333	-40.45	606	1140	ana	High
8912	US_0002776	EAGLE CREEK	AT GLENCOE, KY	US	38.70506497	-84.8238366	155	1131.825	usgs	High
8915	BR_0001686	RIO NEGRO	BARRA DO RIO NEGRO	BR	-21.7289	-41.9547	70	1120	ana	High
8916	SE_0000042	HARKAN	RENGEN	SE	64.0699	14.0955	NA	1110.1	grdb	High
8918	BR_0000170	RIO PRETO DO CRESPO	PONTE DO RIO PRETO DO CRESPO	BR	-9.5558	-62.9508	NA	1110	ana	High
8919	CA_0005862	FLATHEAD RIVER	AT FLATHEAD	CA	49.001220703125	-114.475639343262	NA	1110	hydat	High
8924	US_0002070	PATSALIGA CREEK	NEAR BRANTLEY AL	US	31.59627177	-86.40551809	67.06	1144.775	usgs	High
8925	US_0002286	RED CREEK	AT VESTRY, MS	US	30.7361111	-88.7811111	6.13	1142.185	usgs	High
8931	BR_0002893	NA	PONTE CONSTANSO DE MARCO	BR	-26.6836	-52.0339	900	1120	ana	High
8932	ZA_0000281	MLUMATI	LOMATI (27613114)	ZA	-25.6736	31.5753	274	1122	grdb	High
8934	CA_0001977	BRIGHTSAND RIVER	AT MOBERLEY	CA	49.6113090515137	-90.580810546875	NA	1137.89	hydat	High
8937	BR_0003229	RIO TAINHAS	PASSO TAINHAS	BR	-28.8681	-50.4561	600	1120	ana	High
8938	TH_0000101	WANG RIVER	BAN SOP PO	TH	18.1356	99.5828	NA	1103	game	High
8940	DE_0000572	NECKAR	HORB	DE	48.45	8.71	385.15	1119	ewa	High
8941	BR_0001685	RIO NEGRO	PONTO DE PERGUNTA	BR	-21.7347	-41.9861	63	1100	ana	High
8942	US_0005565	WHITEWATER RIVER	AT TOWANDA, KS	US	37.79612785	-97.0144806	375.36	1103.335	usgs	High
8943	SK_0000034	VAH	LIPTOVSKY MIKULAS	SK	49.0873	19.606	568	1107	grdb	High
8944	CA_0001572	SAINTEMARGUERITE NORDESTRIVER	PRES DE LA RIV STEMARGUERITE1	CA	48.267219543457	-69.9077835083008	NA	1100	hydat	High
8945	CA_0001590	SAINTEMARGUERITE NORDEST RIVER	A 17 KM DE LA RIVER SAINTEMARGUERITE	CA	48.2691993713379	-69.9085998535156	NA	1100	hydat	High
8946	GB_0000221	TEVIOT	ORMISTONE MILL	GB	55.54	-2.47	NA	1110	grdb	High
8950	CA_0001568	ECORCES RIVER	AUX2	CA	48.1822204589844	-71.6452789306641	NA	1110	hydat	High
8951	CA_0001569	ECORCES RIVER	AUX EN AMONT DU PONTROUTE 169	CA	48.1822204589844	-71.6452789306641	NA	1110	hydat	High
8953	CA_0000056	KENNEBECASIS RIVER	AT APOHAQUI	CA	45.7013893127441	-65.601692199707	NA	1100	hydat	High
8954	US_0006080	CLEAR FK TRINITY RIVER	NEAR BENBROOK, TX	US	32.66513275	-97.4419642	184.17	1116.285	usgs	High
8955	US_0002076	MURDER CREEK	AT STATE HWY 41 AT BREWTON, AL.	US	31.10101137	-87.06885829	NA	1126.645	usgs	High
8957	RU_0000336	LOZA	IGRA	RU	57.55	53.07	222	1110	ewa	High
8961	BR_0001342	NA	NA	BR	-20.8475	-43.2419	632	1090	ana	High
8964	RU_0000282	MALAYA LABA	BURNOJE	RU	44.02	40.72	1960	1090	ewa	High
8968	US_0002374	TYGART VALLEY RIVER	AT BELINGTON, WV	US	39.0292694	-79.93590799	511.95	1051.535	usgs	High
8970	ES_0000294	DURATON	SAN MIGUEL DE BERNUY	ES	41.3977777777778	-3.95222222222222	821	1100	afd	High
8971	ES_0000982	NAJERILLA	TORREMONTALVO	ES	42.4994444444444	-2.68305555555556	420	1090	afd	High
8974	FR_0001245	GAVE D'OLORON	OLORON-SAINTE-MARIE (OLORON-SNCF)	FR	43.1979	-0.6085	266.78	1085	grdb	High
8975	US_0004789	EAST FORK VERMILLION RIVER	NEAR PARKER, SD	US	43.44525895	-97.1097788	402.34	1155.135	usgs	High
8976	TZ_0000031	BUBU	THAWI (55124029)	TZ	-4.6333	35.6833	NA	1048	grdb	Medium
8978	BR_0000675	NA	NA	BR	-6.9192	-38.3808	265	1110	ana	High
8983	ZM_0000011	LUFUPA	BELOW KASEMPA (60334620)	ZM	-13.45	25.8667	NA	1125	grdb	High
8984	CA_0003259	BOYNE RIVER	NEAR CARMAN	CA	49.5174713134766	-97.9446105957031	NA	1130	hydat	High
8986	BR_0000314	NA	CACHOEIRA DA LUZ	BR	-8.7667	-54.95	NA	1100	ana	High
8987	CA_0001447	ETCHEMIN RIVER	A SAINTHENRIDELEVIS	CA	46.6355590820312	-71.0447235107422	NA	1130	hydat	High
8989	CA_0000662	GRAND RIVER	AT WEST MONTROSE	CA	43.5850296020508	-80.4814682006836	NA	1170	hydat	Medium
8990	CA_0000103	SAINTJEAN RIVER	EN AMONT DU PONTROUTE 132	CA	48.7688903808594	-64.5149993896484	NA	1090	hydat	High
8996	MY_0000018	BERNAM	JAMBATAN S.K.C.	MY	3.8	101.36	19	1090	grdb	High
8999	GE_0000003	SUPSA	KHIDMAGHALA	GE	42.041	41.798	NA	1100	grdb	High
9000	BR_0001438	NA	FAZENDA VARGEM ALEGRE	BR	-20.1706	-41.9611	NA	1070	ana	High
9001	CA_0004065	DEAN RIVER	NEAR ANAHIM LAKE	CA	52.460018157959	-125.263572692871	NA	1060	hydat	High
9002	US_0002305	STRONG RIVER	AT D`LO, MS	US	31.97777778	-89.8975	78.64	1100.745	usgs	High
9003	BR_0001192	NA	NA	BR	-13.6853	-39.4781	123	1110	ana	High
9004	BR_0001735	RIO PERDIZES	NA	BR	-18.45	-47.6667	613	1110	ana	High
9011	ES_0000318	AGUEDA	CIUDAD RODRIGO	ES	40.6036111111111	-6.56305555555556	610	1088	afd	High
9012	ZA_0000308	SANDRIVIER (TRIB. INCOMATI)	EXETER (27612008)	ZA	-24.7533	31.3883	370	1077	grdb	High
9016	DK_0000031	SKJERN A	AHLERGAARDE	DK	55.95	8.72	7	1040	grdb	High
9017	CA_0005934	NORTH KLONDIKE RIVER	NEAR THE MOUTH	CA	64.0019683837891	-138.596282958984	NA	1090	hydat	High
9018	CH_0000090	THUR (CH)	HALDEN	CH	47.5058	9.2116	502.43	1085	grdb	High
9020	US_0003602	PORTAGE RIVER	AT WOODVILLE OH	US	41.449496	-83.3613156	187.15	1108.515	usgs	High
9021	BR_0000502	NA	NOVA MOCAJUBA	BR	-1.2728	-46.8894	NA	1130	ana	High
9022	CA_0001571	SAINTEMARGUERITE NORDESTRIVER	PRES DE LA RIV STEMARGUERITE2	CA	48.271671295166	-69.857780456543	NA	1090	hydat	High
9024	BR_0002260	RIO MORANGAS	MORANGAS	BR	-19.5544	-52.165	391	1080	ana	High
9027	BR_0002500	RIO IGUATEMI	NA	BR	-23.6481	-55.3894	319	1060	ana	High
9028	US_0006547	RIVER PUERCO	ABOVE ARROYO CHICO NEAR GUADALUPE, NM	US	35.60088889	-107.1666111	1813.58	1087.795	usgs	High
9029	BR_0001758	RIO AREIAS	NA	BR	-16.0506	-48.3664	855	1115	ana	High
9030	ZW_0000024	NGEZI (TRIB. ZAMBEZI)	NGEZI DAM U/S G/W (63341006)	ZW	-18.6667	30.5167	NA	1054	grdb	High
9031	CA_0001912	MCKENZIE RIVER	BELOW ANDRE LAKE	CA	54.5472183227539	-65.5522232055664	NA	1040	hydat	High
9032	IS_0000014	FNJOSKA	ABOVE ARBUGSA	IS	65.8507	-17.8974	44	1132	grdb	Medium
9033	NZ_0000013	ONGARUE	TARINGAMUTU	NZ	-38.8638	175.2377	194	1075	grdb	High
9038	FR_0000346	CHARENTE	CHENON	FR	45.94	0.25	NA	1070	ewa	High
9039	GB_0000148	TYWI	NANTGAREDIG	GB	51.863	-4.2	7.8	1090.4	grdb	High
9041	BR_0003033	RIO CAPIVARI	CAPIVARI - JUSANTE	BR	-25.0881	-48.8272	670	1100	ana	High
9044	UA_0000048	TISZA	RAKHIV	UA	48.0537	24.2096	432	1070	grdb	High
9048	BR_0001740	RIO ARAGUARI	DESEMBOQUE	BR	-20.0139	-47.0172	960	1070	ana	High
9049	US_0006376	BLANCO RIVER	NEAR KYLE, TX	US	29.97938297	-97.9100051	189.01	1067.075	usgs	High
9051	SE_0000043	VAESTERDALAELVEN	ERSBO	SE	61.3095	13.0081	NA	1103.8	grdb	High
9053	BR_0001266	RIO FANADO	MINAS NOVAS	BR	-17.2197	-42.5969	500	1070	ana	High
9054	BR_0002873	RIO TAPEJARA	PONTE DO RIO TAPEJARA	BR	-27.9269	-52.0917	459	1080	ana	High
9058	ES_0001180	ARAGON	MARTES	ES	42.5925	-0.881666666666667	554	1083	afd	High
9059	FR_0000428	DROPT	ST S. DE GUILLERAGUES	FR	44.64	0.05	19.23	1070	ewa	High
9061	NL_0000009	KLEINE AA OF DOMMELTJE	BOXTEL	NL	51.58	5.32	NA	1139.85	ewa	Medium
9062	US_0000196	BLACKSTONE RIVER	AT WOONSOCKET, RI	US	42.00620936	-71.5031168	32.74	1077.435	usgs	High
9063	BR_0002709	RIO GUARANI	NA	BR	-25.3939	-53.1039	550	1080	ana	High
9064	BR_0002710	RIO GUARANI	NA	BR	-25.3939	-53.1039	430	1080	ana	High
9068	ES_0000311	GUAREÑA	TORO	ES	41.49	-5.38611111111111	649	1063	afd	High
9069	DE_0000570	UMPFER	SACHSENFLUR	DE	49.53	9.71	206.5	1099.9	ewa	High
9073	BR_0002523	RIO XAMBRE	NA	BR	-23.9694	-53.7525	260	1070	ana	High
9081	CN_0000098	MAN LAO JIANG	MAN ZHONG TIAN	CN	22.71666667	101.3333333	NA	1133	chdp	High
9084	US_0003241	DUCK RIVER	AT SHELBYVILLE, TN	US	35.48290044	-86.4625967	NA	1100.745	usgs	High
9087	DE_0000522	NIDDA	ILBENSTADT	DE	50.2785	8.8011	117.16	1072	grdb	High
9089	US_0005170	STRANGER CREEK	NEAR TONGANOXIE, KS	US	39.1163912	-95.0108006	244.13	1051.535	usgs	High
9090	BR_0002448	RIO DOS PATOS	NA	BR	-25.2319	-50.9542	720	1050	ana	High
9091	BR_0000119	RIO UAILAN	MALOCA AILAN	BR	4.6333	-60.1833	NA	1090	ana	High
9093	ES_0000908	MAGRO	MACASTRE	ES	39.3452777777778	-0.824166666666667	290	1075	afd	High
9094	US_0006517	RIVER OJO CALIENTE	AT LA MADERA, NM	US	36.34974167	-106.0441861	1938.2	1085.205	usgs	High
9097	BR_0001691	NA	NA	BR	-21.1292	-42.3667	NA	1080	ana	High
9098	BR_0001309	RIO TODOS OS SANTOS	PEDRO VERSIANI	BR	-17.8789	-41.3108	284	1060	ana	High
9103	ES_0001184	ARBA DE LUESIA	EJEA DE LOS CABALLEROS	ES	42.1186111111111	-1.14972222222222	318	1046	afd	High
9107	BR_0002923	RIO TURVO	PCH MARCO BALDO JUSANTE	BR	-27.5647	-53.7869	304	1039	ana	High
9108	BR_0002430	RIO BANDEIRANTES DO NORTE	NA	BR	-23.0336	-51.7531	375	1060	ana	High
9109	GB_0000107	STOUR (S. ENGLAND)	THROOP MILL	GB	50.761	-1.84	4.4	1073	grdb	High
9115	US_0005929	LITTLE CYPRESS CREEK	NEAR ORE CITY, TX	US	32.6726406	-94.7510435	70.92	991.9654	usgs	Medium
9119	MD_0000001	RAUTEL	BALTI (BELTSY)	MD	47.762	27.929	92	1040	grdb	High
9121	BR_0000805	RIO ITAPECIRICA	NA	BR	-20.2161	-44.9183	750	1040	ana	High
9123	NZ_0000022	HURUNUI	MANDAMUS	NZ	-42.792	172.5416	321	1060	grdb	High
9127	SE_0000039	TAERNAAN	SOLBERG	SE	65.7482	15.3914	NA	1080.9	grdb	High
9128	IE_0000057	INNY	BALLYMAHON	IE	53.5627	-7.7577	NA	1098.8	grdb	High
9131	US_0006102	DENTON CREEK	NEAR JUSTIN, TX	US	33.11901003	-97.2905732	184.91	1035.995	usgs	High
9132	US_0002627	OLENTANGY RIVER	NEAR DELAWARE OH	US	40.35506096	-83.0671318	267.52	1017.865	usgs	High
9135	CA_0000069	ST CROIX RIVER	AT VANCEBORO	CA	45.5688896179199	-67.4297180175781	NA	1080	hydat	High
9136	US_0000013	ST. CROIX RIVER	AT VANCEBORO, MAINE	US	45.5683333	-67.4283333	111.92	1069.665	usgs	High
9139	GB_0000194	DERWENT (TRIB. TRENT)	ST. MARYS BRIDGE	GB	52.927	-1.472	44	1054	grdb	High
9146	ES_0001029	NELA	TRESPADERNE	ES	42.8036111111111	-3.40027777777778	540	1093	afd	High
9149	NO_0000073	VOSSO	BULKEN	NO	60.63	6.28	46	1102	grdb	High
9150	US_0005589	SKELETON CREEK	NEAR LOVELL, OK	US	36.06004045	-97.5850471	277.3	1067.075	usgs	High
9151	DE_0000644	LIPPE	BENTFELD	DE	51.7488	8.6305	92.33	1018	grdb	High
9154	CA_0004112	ELAHO RIVER	NEAR SQUAMISH	CA	50.2236099243164	-123.577781677246	NA	1100	hydat	High
9157	ES_0001030	OCA	OÑA	ES	42.7363888888889	-3.4125	570	1051	afd	High
9162	US_0005130	SALT CREEK	NEAR ADA, KS	US	39.13916876	-97.8369849	380.15	994.5554	usgs	Medium
9163	CA_0005635	ASHNOLA RIVER	NEAR KEREMEOS	CA	49.2076301574707	-119.993522644043	NA	1050	hydat	High
9164	FR_0000647	LOIR	SAINT-MAUR SUR LOIR	FR	48.15	1.42	115.94	1160	ewa	Medium
9165	BR_0000364	NA	NA	BR	-13.8097	-46.6494	NA	1020	ana	High
9166	ES_0001142	HUERVA	ZARAGOZA	ES	41.6380555555556	-0.896666666666667	203	1017	afd	High
9171	BR_0002233	NA	NA	BR	-22.0594	-48.09	544	1070	ana	High
9172	US_0002160	LITTLE TALLAPOOSA RIVER	NEAR NEWELL AL	US	33.43733498	-85.399118	256.93	1051.535	usgs	High
9173	IE_0000087	SLANE	SCARRAWALSH	IE	52.548	-6.5505	NA	1030.8	grdb	High
9174	FR_0000722	ALLIER	MONISTROL D'ALLIER	FR	44.97	3.65	NA	988	ewa	High
9176	DE_0000428	HASE	BERSENBRUCK	DE	52.56	7.95	31.6	945	ewa	Medium
9178	FR_0000213	CEZE	LA ROQUE SUR CEZE	FR	44.19	4.53	NA	1060	ewa	High
9180	US_0001848	HILLSBOROUGH RIVER	AT MORRIS BR NEAR THONOTOSASSA FL	US	28.0986111	-82.31138889	0	971.2455	usgs	Medium
9181	RU_0000241	KUBENA	TROITSE-YENAL'SKOYE	RU	60.55	40.42	146.52	1110	arcticnet	Medium
9182	CA_0000205	ANNAPOLIS RIVER	AT LAWRENCETOWN	CA	44.8808288574219	-65.1579208374023	NA	1020	hydat	High
9185	US_0002501	WILLS CREEK	AT CAMBRIDGE OH	US	40.01451644	-81.5870674	235.2	1051.535	usgs	High
9187	US_0005582	BUFFALO CREEK	NEAR LOVEDALE, OK	US	36.7705872	-99.3670537	488.47	1056.715	usgs	High
9190	ES_0000386	HENARES	BUJALARO	ES	40.9536111111111	-2.91805555555556	798	1036	afd	High
9191	CI_0000006	NERO	GRANDE BEREBY	CI	4.74	-6.91	NA	980	grdb	Medium
9192	CA_0001439	LOUP RIVER	DU EN AMONT DE LA ROUTE NO 232	CA	47.8227806091309	-69.5194396972656	NA	1050	hydat	High
9193	US_0003207	SEQUATCHIE RIVER	NEAR WHITWELL, TN	US	35.20657915	-85.4970983	192.86	994.5554	usgs	High
9196	US_0002299	TUSCOLAMETA CREEK	AT WALNUT GROVE, MS	US	32.58833333	-89.465	98.36	1064.485	usgs	High
9198	US_0004790	WEST FORK VERMILLION RIVER	NEAR PARKER,SD	US	43.41562216	-97.2051972	408.44	979.0155	usgs	Medium
9199	ES_0000119	MIÑO	RABADE	ES	43.1158333333333	-7.61444444444444	382	999	afd	High
9201	SE_0000086	ROERAN	YTTERHOLMEN	SE	66.1708	21.8077	51	1012	grdb	High
9202	ZA_0000249	MATLABAS	HAARLEM EAST (27546004)	ZA	-24.1594	27.4792	952	1054	grdb	High
9203	CA_0004640	SALMON RIVER	AT FALKLAND	CA	50.4985618591309	-119.558609008789	NA	1030	hydat	High
9204	FR_0001030	ITON	NORMANVILLE	FR	49.08	1.15	47.33	1050	ewa	High
9205	CA_0001024	MADAWASKA RIVER	AT WHITNEY	CA	45.4966697692871	-78.2333297729492	NA	1010	hydat	High
9206	BR_0002905	RIO BURRO BRANCO	PASSO PIO X	BR	-26.8594	-52.9044	320	1010	ana	High
9207	CA_0004459	BAEZAEKO RIVER	AT LOT 10262	CA	52.9861106872559	-123.802780151367	NA	992	hydat	High
9208	ZM_0000051	MANSHYA	SHIWA NGANDU (60773275)	ZM	-11.2167	31.6667	NA	1008	grdb	High
9211	CA_0001131	MITCHINAMECUS RIVER	A LA TETE DE LA CHUTE RASCAS	CA	47.184440612793	-75.1436080932617	NA	1050	hydat	High
9213	US_0003061	HARPETH RIVER	AT BELLEVUE, TN	US	36.0545633	-86.9285102	164.91	1017.865	usgs	High
9216	FR_0001069	ORNE	RABODANGES	FR	48.81	-0.32	NA	1000	ewa	High
9217	BR_0002366	RIO PITANGUI	BARRA DO PITANGUI	BR	-24.8331	-50.2831	720	1040	ana	High
9218	BR_0001010	RIO VERDE GRANDE	PONTE DE RODAGEM	BR	-16.7667	-43.7	573	1040	ana	High
9219	BR_0001479	NA	NA	BR	-20.3164	-40.6517	580	980	ana	Medium
9220	FR_0000871	MEUSE	DOMREMY-LA-PUCELLE	FR	48.44	5.68	268.27	1030	ewa	High
9221	BR_0001415	RIO CORRENTE GRANDE	FAZENDA CORRENTE	BR	-18.8947	-42.7125	631	1050	ana	High
9223	BR_0001932	RIO DO CERVO	UHE FURNAS RIO DO CERVO	BR	-21.2331	-45.1736	798	1060	ana	High
9225	ES_0000975	BERGANTES	ZORITA	ES	40.78	-0.154444444444444	570	1038	afd	High
9226	GB_0000085	KENNET	THEALE	GB	51.432	-1.066	43.4	1033.4	grdb	High
9227	ZW_0000060	CHIREDZI	MANJIRENJI DAM U/S (63423208)	ZW	-20.4833	31.5333	NA	1049	grdb	High
9228	FR_0000350	BOUTONNE	TORXE	FR	45.95	-0.62	4.91	1030	ewa	High
9230	BR_0000144	NA	NA	BR	-11.0667	-64.0833	NA	1050	ana	High
9232	BR_0003304	NA	CERRO CHATO	BR	-31.8647	-53.2683	115	1050	ana	High
9233	BR_0002417	RIO CONGONHAS	PONTE PRETA	BR	-23.1697	-50.7883	370	1050	ana	High
9234	CA_0005886	TUTSHI RIVER	AT OUTLET OF TUTSHI LAKE	CA	59.9477806091309	-134.332504272461	NA	989	hydat	High
9235	DE_0000034	ZWICKAUER MULDE	ZWICKAU-POELBITZ	DE	50.7409	12.4936	255.36	1029.7	grdb	High
9236	US_0006429	FRIO RIVER	AT CONCAN, TX	US	29.48856496	-99.7047756	366.9	1007.505	usgs	High
9237	BR_0001488	NA	ITAICI	BR	-20.5283	-41.5114	380	1010	ana	High
9239	CN_0000112	MANG SHI DA HE	DENG GA	CN	24.4	98.43333333	NA	1021	chdp	High
9245	BR_0001300	NA	UMBURATIBA	BR	-17.2333	-40.5833	NA	1030	ana	High
9246	CA_0000052	SALMON RIVER	AT CASTAWAY	CA	46.2907218933105	-65.7227478027344	NA	1050	hydat	High
9249	NI_0000003	RIO VILLA NUEVA	PUENTE	NI	12.93	-86.83	NA	1035.7	grdb	High
9250	FR_0000274	DOUBS	GOUMOIS	FR	47.27	6.95	NA	1060	ewa	High
9252	CA_0000015	GREEN RIVER	AT DEUXIEME SAULT	CA	47.4705581665039	-68.2355575561523	NA	1030	hydat	High
9254	IE_0000068	BARROW	PASS BRIDGE	IE	53.1619	-7.0703	NA	1063.6	grdb	High
9258	BR_0002649	RIO JANGADA	JANGADA DO SUL	BR	-26.3869	-51.2719	800	1010	ana	High
9259	BR_0002650	RIO JANGADA	UHE GOV. BENTO MUNHOZ JANGADA DO SUL	BR	-26.3869	-51.2719	800	1010	ana	High
9264	FR_0000757	TAURION	LE CHAUVAN	FR	45.91	1.41	NA	1030	ewa	High
9266	GB_0000156	DEE (WALES)	MANLEY HALL	GB	52.967	-2.971	25.4	1019.3	grdb	High
9268	ES_0000117	MIÑO	CELA (MARGEN DERECHA)	ES	43.1402777777778	-7.60305555555555	382	999	afd	High
9269	ES_0000118	MIÑO	CELA (MARGEN IZQUIERDA)	ES	43.14	-7.59888888888889	382	999	afd	High
9270	DE_0000555	TAUBER	BAD MERGENTHEIM	DE	49.4925	9.7736	199.68	1013	grdb	High
9272	BR_0003167	RIO TIJUCAS	MAJOR GERCINO	BR	-27.4142	-48.9528	38	1042	ana	High
9275	BR_0000554	RIO PIRAPEMAS	PEDRAS	BR	-3.9333	-44.0222	45	1010	ana	High
9276	FR_0000184	TILLE	LES MAILLYS+BIEF	FR	47.16	5.34	NA	1110	ewa	Medium
9281	BR_0001226	RIO SALGADO	NA	BR	-14.8781	-39.4806	103	997	ana	High
9283	ES_0000609	ZAPATON	VILLAR DEL REY	ES	39.1463888888889	-6.86972222222222	218	1049	afd	High
9289	CA_0005195	INCOMAPPLEUX RIVER	NEAR BEATON	CA	50.773609161377	-117.676666259766	NA	1020	hydat	High
9290	US_0006375	BLANCO RIVER	AT HALIFAX RCH NEAR KYLE, TX	US	30.00555556	-97.9525	205.74	1012.685	usgs	High
9295	RU_0000212	VIDLITSA BOLSHIJE	GORY	RU	61.3	32.47	95	977	ewa	High
9296	CA_0000095	YORK RIVER	A SUNNY BANK	CA	48.834171295166	-64.625	NA	1010	hydat	High
9297	CN_0000005	LIU SHA HE	MENG HAI	CN	21.95	100.4166667	NA	1032	chdp	High
9299	BR_0002492	RIO DAS ANTAS	NA	BR	-23.3894	-53.2331	270	1030	ana	High
9301	CA_0005911	SOUTH MACMILLAN RIVER	AT KILOMETRE 407 CANOL ROAD	CA	62.9249992370605	-130.54167175293	NA	997	hydat	High
9302	CA_0001267	MASKINONGE RIVER	AU PONT DU CN PRES DE SAINTEURSULE	CA	46.3011093139648	-73.0966720581055	NA	1030	hydat	High
9305	ES_0000901	GUADAZAON	GUADAZAON	ES	39.7091666666667	-1.63444444444444	680	947	afd	Medium
9307	BR_0000167	RIO BRANCO	FAZENDA RIO BRANCO	BR	-9.8869	-62.9847	89.21	988	ana	High
9309	RU_0000264	OLKHOVAYA	KOSHARY	RU	49.03	41.02	160	1020	ewa	High
9310	BR_0001912	RIO DAS MORTES	BARROSO - MONTANTE	BR	-21.1833	-43.9667	899	1030	ana	High
9311	BR_0001931	RIO DO CERVO	USINA NEPOMUCENO	BR	-21.2572	-45.1672	728	1020	ana	High
9314	CA_0001647	COXIPI RIVER	A LA SORTIE DU LAC COXIPI	CA	51.5022201538086	-58.396110534668	NA	1060	hydat	High
9317	SK_0000040	TOPLA	HANUSOVCE	SK	49.0333	21.5	NA	1050	grdb	High
9321	PA_0000006	LA VILLA	ATALAYITA	PA	7.8667	-80.5333	25	1000	grdb	High
9322	MX_0000015	RIO BADIRAGUATO	BADIRAGUATO	MX	25.3333	-107.5292	230	1018	grdb	High
9323	FR_0000189	LANTERNE	FLEUREY-LES-FAVERNEY	FR	47.7475	6.0756	257.31	1020	grdb	High
9328	US_0002023	MUCKALEE CREEK	AT GA 195, NEAR LEESBURG, GA	US	31.7761111	-84.1394444	65.65	937.5757	usgs	Medium
9329	BR_0001913	RIO DAS MORTES	BARROSO	BR	-21.1858	-43.9797	900	1040	ana	High
9331	BR_0000619	RIO UBATUBA	CHAVAL RETIRO	BR	-3.0786	-41.255	NA	1000	ana	High
9332	BR_0000270	NA	CACHIMBO	BR	-9.8172	-54.8858	431	1010	ana	High
9339	ES_0000025	NERVION	ECHEVARRI	ES	43.2491666666667	-2.89333333333333	18	997	afd	High
9342	US_0002654	OHIO BRUSH CREEK	NEAR WEST UNION OH	US	38.8036838	-83.4210226	155.51	1002.325	usgs	High
9343	FR_0000468	DORDOGNE	BORT LES ORGUES	FR	45.41	2.5	NA	1010	ewa	High
9344	BR_0001614	RIO PRETO	NA	BR	-22.2167	-43.05	NA	1030	ana	High
9345	ZA_0000279	NWANEDZI	WENELA DRIFT (27611004)	ZA	-24.4494	31.9767	159	928	grdb	Medium
9347	CN_0000137	NAN GUO HE	NA GOU BA	CN	22.28333333	100.4166667	NA	996	chdp	High
9348	US_0003644	TONAWANDA CREEK	AT RAPIDS NY	US	43.09305556	-78.6361111	174.1	903.9059	usgs	Medium
9349	US_0006506	RIVER PUEBLO DE TAOS	BELOW LOS CORDOVAS, NM	US	36.3793333	-105.6678333	2026.94	984.1955	usgs	High
9350	US_0006595	BLACK RIVER	AT MALAGA, NM	US	32.24086667	-104.0646861	886.98	906.4958	usgs	Medium
9353	IN_0000244	Mahanadi	Manendragarh	IN	23.2036	82.2172	411	1100	wris	Medium
9356	CA_0000965	ENGLEHART RIVER	NEAR ENGLEHART	CA	47.7944412231445	-79.8888931274414	NA	1110	hydat	Medium
9360	ES_0000577	CIGÜELA	QUINTANAR DE LA ORDEN	ES	39.6438888888889	-3.07972222222222	694	995	afd	High
9363	CA_0004297	GOLD RIVER	BELOW UCONA RIVER	CA	49.7023086547852	-126.11141204834	NA	992	hydat	High
9364	CO_0000018	SUAZA	PTE.GARCES	CO	2.03	-75.77	893	969	grdb	High
9365	FR_0000734	ALAGNON	LEMPDES	FR	45.3814	3.2641	503.73	984	grdb	High
9366	LS_0000009	SOUTH PHUTHIATSANA	MASIANOKENG (66818024)	LS	-29.3983	27.5617	1510	977	grdb	High
9368	BR_0000329	RIO VILA NOVA	ACAMPAMENTO BACURI	BR	0.4067	-51.7433	NA	1000	ana	High
9370	DE_0000395	SCHWALM (DE-HE)	UTTERSHAUSEN	DE	51.0824	9.335	167.59	986.1	grdb	High
9374	GB_0000102	TEST	BROADLANDS	GB	50.968	-1.496	10.1	1040	grdb	High
9376	BR_0000028	RIO MOA	SERRA DO MOA	BR	-7.4467	-73.6644	NA	1030	ana	High
9377	GB_0000163	LUNE	CATON	GB	54.081	-2.72	10.7	983	grdb	High
9378	BR_0001811	NA	NA	BR	-15.7956	-47.7844	1000	1015	ana	High
9386	ZW_0000040	POTE	ARCADIA UPPER G/W (63315524)	ZW	-17.3667	31.4333	NA	1028	grdb	High
9387	CA_0000130	NORTHWEST MIRAMICHI RIVER	AT TROUT BROOK	CA	47.0947494506836	-65.8365020751953	NA	948	hydat	High
9388	BR_0001471	NA	NA	BR	-19.0411	-40.5339	54	1070	ana	Medium
9391	CA_0000269	TUSKET RIVER	AT WILSONS BRIDGE	CA	43.9248085021973	-65.8685302734375	NA	1070	hydat	Medium
9392	FR_0000566	FOUZON	MEUSNES	FR	47.25	1.51	NA	1000	ewa	High
9394	ZW_0000058	POPOTEKE	KYLE DAM U/S G/W (63423349)	ZW	-20.1167	31.0167	NA	946	grdb	High
9396	BR_0001905	NA	LUMINARIAS	BR	-21.5061	-44.9156	1050	1010	ana	High
9398	US_0003590	TIFFIN RIVER	AT STRYKER OH	US	41.50449567	-84.4296719	208.58	1061.895	usgs	Medium
9401	DE_0000800	GROSSE AUE	HEIDE OP	DE	52.6013	8.9028	31.44	1014	grdb	High
9402	DE_0000762	ALTMUEHL	TREUCHLINGEN	DE	48.9532	10.9135	407	982	grdb	High
9404	ZM_0000032	KAFUBU	FISENGE (60334240)	ZM	-13.1833	28.5833	NA	974	grdb	High
9406	US_0006164	E FK SAN JACINTO RIVER	NEAR NEW CANEY, TX	US	30.1454932	-95.1243756	13.41	1004.915	usgs	High
9409	CA_0000955	KINOJEVIS RIVER	EN AVAL DU LAC PREISSAC	CA	48.4055595397949	-78.3641662597656	NA	984	hydat	High
9413	CA_0005302	VERMILION RIVER	NEAR RADIUM HOT SPRINGS	CA	50.9166717529297	-116.001388549805	NA	951	hydat	High
9415	GB_0000206	BLACKWATER (N. IRELAND)	MAYDOWN BRIDGE	GB	54.413	-6.734	15	970.2	grdb	High
9417	BR_0002334	NA	SALTO GRANDE - CIA AVE	BR	-22.84	-49.9925	NA	1000	ana	High
9419	BR_0001620	NA	JUIZ DE FORA - JUSANTE	BR	-21.7783	-43.3253	700	969	ana	High
9421	BR_0001478	NA	SANTA LEOPOLDINA	BR	-20.0997	-40.5278	160	929	ana	Medium
9422	BR_0001854	NA	MONTIVIDIU	BR	-17.3592	-51.0753	NA	1020	ana	High
9423	RU_0000306	NEIA	PARFENJEVO	RU	58.48	43.42	170	954	ewa	High
9424	CA_0004935	BRIDGE RIVER	AT LAJOIE FALLS	CA	50.8375015258789	-122.856666564941	NA	956	hydat	High
9425	CA_0004858	BIG CREEK	ABOVE GROUNDHOG CREEK	CA	51.5236892700195	-123.11589050293	NA	1010	hydat	High
9426	CA_0000642	NITH RIVER	NEAR CANNING	CA	43.1897201538086	-80.4550323486328	NA	1034.28	hydat	High
9427	FR_0000163	DRAC	LE SAUTET	FR	44.82	5.91	NA	990	ewa	High
9429	RU_0000404	UTULIK	UTULIK	RU	51.53	104.07	466.5	959	arcticnet	High
9430	US_0002726	EAST FORK WHITEWATER RIVER	AT BROOKVILLE, IN	US	39.43393969	-85.0032932	189.51	984.1955	usgs	High
9432	BR_0002315	RIO CAPIVARI	JAGUARIAIVA	BR	-24.2642	-49.7317	840	969	ana	High
9433	CN_0000113	NAN WAN HE	ZHANG FENG	CN	24.21666667	97.8	NA	931	chdp	High
9435	US_0000075	SACO RIVER	NEAR CONWAY, NH	US	43.9908333	-71.0905556	127.47	997.1454	usgs	High
9436	DE_0000202	TIROLER ACHEN / GROSSACHE	STAUDACH	DE	47.78	12.48	532	951.9	grdb	High
9439	BR_0001049	RIO GRANDE	CASA REAL	BR	-13.0014	-45.6308	NA	938	ana	High
9441	CA_0001533	NA	PERIBONCA PETITE RIVER	CA	48.8141708374023	-72.0477828979492	NA	1090	hydat	Medium
9442	CA_0001729	GREY RIVER	NEAR PUDOPS LAKE	CA	48.163330078125	-56.810001373291	NA	982	hydat	High
9444	BR_0003288	ARROIO DO SAPATO	PASSO DO SAPATO	BR	-30.9833	-52.0833	40	983	ana	High
9445	BR_0003289	ARROIO DO SAPATO	PASSO DO SAPATO 1	BR	-30.9833	-52.0833	40	983	ana	High
9447	TH_0000056	PING RIVER	BELOW THA KRAD-	TH	16.4492	99.4408	NA	969	game	High
9448	BR_0001619	NA	JUIZ DE FORA	BR	-21.75	-43.3333	670	956	ana	High
9452	US_0003213	FLINT RIVER	AT BROWNSBORO, AL.	US	34.7492568	-86.4466551	187.73	971.2455	usgs	High
9454	BR_0002066	RIO JAGUARI-MIRIM	NA	BR	-21.8742	-46.8939	NA	932	ana	High
9455	US_0006092	ELM FK TRINITY RIVER	NEAR SANGER, TX	US	33.38650347	-97.0850105	168.78	986.7855	usgs	High
9460	BR_0002886	RIO JACUTINGA	ENGENHO VELHO	BR	-27.2364	-52.2094	320	918	ana	Medium
9461	US_0006267	MILL CREEK	NEAR BELLVILLE, TX	US	29.88106145	-96.2052402	37.44	973.8355	usgs	High
9463	BR_0002662	RIO DA AREIA	UHE GOV. BENTO MUNHOZ MADEIREIRA GAVAZONI	BR	-25.8075	-51.2886	805	976	ana	High
9464	BR_0003196	RIO ITOUPAVA	NA	BR	-28.9583	-49.6014	10	970	ana	High
9465	US_0002275	CHUNKY RIVER	NEAR CHUNKY, MS	US	32.3261111	-88.9091667	81.99	955.7056	usgs	High
9468	CO_0000015	FUNDACION	FUNDACION	CO	10.5	-74.13	55	992	grdb	High
9471	ID_0000003	KETAHUN	TUNGGANG	ID	-3.0925	102.1919	NA	968.8	grdb	High
9474	US_0004723	WHITE CLAY CREEK	NEAR OGLALA SD	US	43.14651127	-102.6833116	914.88	971.2455	usgs	High
9475	US_0000283	MILLERS RIVER	AT ERVING, MA	US	42.5975862	-72.4381423	118.26	963.4756	usgs	High
9480	DE_0000520	KINZIG (TRIB. MAIN)	HANAU	DE	50.1321	8.9458	104.74	921	grdb	High
9487	FI_0000126	LAPVAEAERTINJOKI	PERUS	FI	62.239	21.582	10	976	grdb	High
9488	CA_0001206	MEKINAK RIVER	PRES DE LA RIVER SAINTMAURICE	CA	46.8963890075684	-72.7266693115234	NA	997	hydat	High
9492	US_0002085	PERDIDO RIVER	AT BARRINEAU PARK, FL	US	30.69046866	-87.440258	7.85	1020.455	usgs	High
9495	CA_0004113	CHEAKAMUS RIVER	NEAR BRACKENDALE	CA	49.8160285949707	-123.150077819824	NA	965	hydat	High
9496	BR_0002936	NA	NA	BR	-28.3847	-54.0314	160	970	ana	High
9497	RU_0000449	KUZEMA	KUZEMA	RU	65.38	34.23	0	882	arcticnet	Medium
9498	US_0005925	BIG CYPRESS CREEK	NEAR PITTSBURG, TX	US	33.02095787	-94.8821554	75.44	958.2956	usgs	High
9499	BR_0003203	NA	NA	BR	-30.3597	-54.3133	81.56	965	ana	High
9500	CA_0005170	WOOD RIVER	NEAR DONALD	CA	52.1522216796875	-118.404441833496	NA	956	hydat	High
9501	BR_0000874	RIO BORRACHUDO	NA	BR	-18.4672	-45.6458	641	970	ana	High
9502	US_0005928	BLACK CYPRESS BAYOU	AT JEFFERSON, TX	US	32.7779173	-94.3574153	52.26	945.3457	usgs	High
9503	RU_0000326	VOGULKA	SHAMARY	RU	57.32	58.23	340	969	ewa	High
9505	US_0002136	CHATTOOGA RIVER	ABOVE GAYLESVILLE AL	US	34.29036965	-85.5091268	171.33	947.9356	usgs	High
9511	US_0004675	RAPID CREEK	ABOVE CANYON LAKE NEAR RAPID CITY,SD	US	44.05276555	-103.3118507	1036.7	968.6556	usgs	High
9513	DE_0000752	ILLER	KEMPTEN	DE	47.7304	10.3169	656	954.6	grdb	High
9515	CN_0000091	MI JU HE	LIAN CHENG	CN	26.1	100	NA	969	chdp	High
9518	CN_0000079	TENG TIAO JIANG	HUANG MAO LING	CN	23	102.7333333	NA	906	chdp	Medium
9520	ES_0000648	ESTENA	HUERTA ESTENA	ES	39.3958333333333	-4.96	380	925	afd	High
9522	CA_0001680	INDIAN BROOK	AT INDIAN FALLS	CA	49.5119400024414	-56.1124992370605	NA	974	hydat	High
9523	US_0003614	BLACK RIVER	AT ELYRIA OH	US	41.38032368	-82.10459279	189.01	1025.635	usgs	Medium
9525	GN_0000007	MILO	KONSANKORO	GN	9.03	-9	NA	1000	grdb	High
9526	FR_0001172	MADON	PULLIGNY	FR	48.5441	6.1316	269.87	940	grdb	High
9527	IT_0000157	SACCO	CECCANO	IT	41.57	13.33	NA	923	ewa	High
9530	BR_0001493	RIO CASTELO	CASTELO	BR	-20.6061	-41.1997	107	972	ana	High
9531	MW_0000013	SOUTH RUKURU	CHIMSEWEZO (65312403)	MW	-12.1167	33.4167	NA	977	grdb	High
9532	CA_0001211	MEKINAC RIVER	EN AVAL DE SAINTJOSEPHDEMEKINAC	CA	46.9069404602051	-72.7155609130859	NA	997	hydat	High
9534	BR_0002181	RIO JAGUARI	PIRES	BR	-22.8714	-46.3619	NA	955	ana	High
9535	DE_0000263	KINZIG (TRIB. RHEIN)	SCHWAIBACH	DE	48.3917	8.0326	173	954	grdb	High
9537	IN_0000204	Cauvery	Thimmanahalli	IN	12.9833	76.0383	910	1010	wris	High
9543	ZA_0000178	MGENI	HOWICK (27662401)	ZA	-29.4872	30.2375	990	950	grdb	High
9545	BR_0002301	NA	TAQUARIVAI	BR	-23.9242	-48.6589	600	952	ana	High
9547	BR_0002608	RIO PRETO	AVENCAL	BR	-26.2667	-49.6211	788	960	ana	High
9549	US_0006386	COLETO CREEK	NEAR SCHROEDER, TX	US	28.83165447	-97.1863786	26.7	955.7056	usgs	High
9550	GB_0000007	DEVERON	MUIRESK	GB	57.5374	-2.4944	25.3	954.9	grdb	High
9551	FR_0001034	ORGE	MORSANG-SUR-ORGE	FR	48.6667	2.3406	83.65	922	grdb	High
9556	FR_0000980	AIRE	CHEVIERES	FR	49.34	4.9	117.93	1000	ewa	Medium
9559	BR_0002247	NA	FAZENDA NOSSA SENHORA APARECIDA	BR	-21.6489	-48.8731	NA	952	ana	High
9562	US_0006316	PEDERNALES RIVER	NEAR FREDERICKSBURG, TX	US	30.22048147	-98.8697609	477.01	955.7056	usgs	High
9566	CA_0000990	MATTAWA RIVER	BELOW BOUILLON LAKE	CA	46.2988891601562	-78.9072189331055	NA	909	hydat	High
9568	CA_0001437	LOUP RIVER	DU EN AVAL DE LA RIVER FOURCHUE	CA	47.7161102294922	-69.5363922119141	NA	948	hydat	High
9570	BR_0001470	RIO PANCAS	PONTE DO PANCAS	BR	-19.4228	-40.6864	107	920	ana	High
9571	SK_0000029	KYSUCA	KYSUCKE NOVE MESTO	SK	49.2978	18.786	346	955	grdb	High
9573	FR_0001161	SEILLE	NOMENY	FR	48.89	6.23	NA	925	ewa	High
9574	ZA_0000311	BIVANE	WELGELEGEN (27632104)	ZA	-27.5281	30.8539	969	953	grdb	High
9575	CA_0001495	TROIS PISTOLES RIVER	DES A 21 KM EN AMONT DU PONTROUTE 132	CA	48.089168548584	-69.1963882446289	NA	932	hydat	High
9576	BR_0002617	NA	QUITANDINHA	BR	-25.855	-49.5258	800	939	ana	High
9577	AT_0000160	LAVANT	KROTTENDORF	AT	46.664	14.946	354	954.5	grdb	High
9579	BR_0001157	NA	EMBOACICA	BR	-12.6167	-38.1833	6	946	ana	High
9580	BR_0002416	RIO CONGONHAS	NA	BR	-23.2289	-50.7339	390	943	ana	High
9583	ES_0000296	PORMA	SECOS DE PORMA	ES	42.6022222222222	-5.40361111111111	820	947	afd	High
9584	BR_0001674	RIO GRANDE	PONTE BERSOT	BR	-22.1406	-42.3333	575	963	ana	High
9586	DE_0000163	MINDEL	OFFINGEN	DE	48.4826	10.3625	436.4	951	grdb	High
9588	US_0004876	SHEEP CREEK	NEAR MORRILL, NEBR.	US	41.97027778	-103.9538889	1217.7	872.826	usgs	Medium
9589	RU_0000369	TCHERNAYA	KRASNY KHOLM	RU	51.58	54.13	170	943	ewa	High
9592	BR_0001745	NA	NA	BR	-19.3233	-46.6372	839	950	ana	High
9594	CA_0001423	SAINTEANNE DU NORD RIVER	A LA CENTRALE DE SAINTFEREOL	CA	47.1236114501953	-70.8183288574219	NA	974	hydat	High
9595	CA_0005875	SKAGIT RIVER	NEAR HOPE	CA	49.0472183227539	-121.095832824707	NA	907	hydat	High
9600	CA_0003261	BOYNE RIVER	NEAR STEPHENFIELD	CA	49.5133285522461	-98.2494430541992	NA	987	hydat	High
9603	BR_0002832	RIO BRANCO	RETIRO ALEGRIA	BR	-21.2017	-57.1853	160	938	ana	High
9604	US_0002483	STILLWATER CREEK	AT UHRICHSVILLE OH	US	40.3861774	-81.3470554	255.62	950.5256	usgs	High
9605	BR_0001294	NA	NA	BR	-16.8386	-40.1564	200	936	ana	High
9606	BR_0002213	NA	NA	BR	-22.5167	-48.65	NA	944	ana	High
9607	BR_0002214	NA	NA	BR	-22.5167	-48.65	450	935	ana	High
9610	CA_0002001	KAMISKOTIA RIVER	ABOVE ENID CREEK	CA	48.6266403198242	-81.6303329467773	NA	926.36	hydat	High
9613	ES_0000580	ZANCARA	PROVENCIO, EL	ES	39.3788888888889	-2.56805555555556	700	906	afd	High
9614	DE_0000616	WUEMME	HELLWEGE SCHLEUSE	DE	53.0758	9.2058	11.9	955	grdb	High
9615	BR_0002939	RIO IJUIZINHO	PCH IJUIZINHO PONTE QUEIMADA	BR	-28.7778	-53.9817	365	893	ana	High
9616	CA_0005184	GOLDSTREAM RIVER	BELOW OLD CAMP CREEK	CA	51.6687812805176	-118.596199035645	NA	934	hydat	High
9621	BR_0003032	RIO CAPIVARI	UHE CAPIVARI CACHOEIRA VERTIDA	BR	-25.1433	-48.8628	NA	966	ana	High
9622	RU_0000261	PANSHINKA	PANSHINO	RU	49.05	44.03	100	965	ewa	High
9623	BR_0002048	NA	JACUTINGA	BR	-22.2694	-46.6053	920	918	ana	High
9628	BY_0000006	GAVYA	LUBINYATA	BY	53.98	25.63	133.46	920	ewa	High
9630	GB_0000042	URE	WESTWICK LODGE	GB	54.098	-1.456	14.2	914.6	grdb	High
9632	GB_0000003	CONON	MOY BRIDGE	GB	57.5569	-4.5388	10	961.8	grdb	High
9633	BR_0002795	RIO PIQUIRI	PIQUIRI	BR	-17.9381	-54.5958	207	927	ana	High
9634	FR_0001321	UBAYE	LAUZET UBAYE (ROCHE ROUSSE)	FR	44.4491	6.4003	842.02	946	grdb	High
9635	BR_0002946	RIO PIRATINIM	PASSO DO DIAS	BR	-28.6569	-54.4589	200	932	ana	High
9638	CA_0004824	GUICHON CREEK	AT OUTLET OF MAMIT LAKE	CA	50.3611106872559	-120.809936523438	NA	871	hydat	Medium
9640	BR_0002889	RIO IRANI	PASSO ALTO IRANI	BR	-26.9694	-52.3669	480	933	ana	High
9641	RU_0000314	VORIA	MISHNEVO	RU	55.98	38.22	190	947	ewa	High
9642	CA_0003745	SUKUNKA RIVER	ABOVE CHAMBERLAIN CREEK	CA	55.1877784729004	-121.761108398438	NA	927	hydat	High
9644	FR_0000572	AUMANCE	PONT DE LA ROCHE	FR	46.53	2.67	182.69	928	ewa	High
9645	GB_0000174	ANNAN	BRYDEKIRK	GB	55.021	-3.266	10	925	grdb	High
9646	GB_0000143	USK	CHAIN BRIDGE	GB	51.745	-2.949	22.6	911.7	grdb	High
9650	US_0005663	SPAVINAW CREEK	NEAR EUCHA, OK	US	36.37925097	-94.936901	207.92	929.8057	usgs	High
9653	BR_0000977	RIO VERDE	FAZENDA RIO VERDE	BR	-17.25	-46.2	NA	914	ana	High
9654	DE_0000230	SAALACH	UNTERJETTENBERG	DE	47.6812	12.8228	494	927.3	grdb	High
9655	FR_0000383	LAYON	SAINT-LAMBERT-DU-LATTAY (PONT BEZIGON)	FR	47.3152	-0.6328	69.52	920	grdb	High
9658	CA_0004644	EAGLE RIVER	NEAR MALAKWA	CA	50.9363403320312	-118.801651000977	NA	932	hydat	High
9660	RU_0000190	OREDEZH	VYRITSA	RU	59.42	30.37	96	920	ewa	High
9665	US_0006071	PINE ISLAND BAYOU	NEAR SOUR LAKE, TX	US	30.1060464	-94.3346324	0	870.236	usgs	Medium
9666	BR_0002970	RIO JAQUARIZINHO	ERNESTO ALVES	BR	-29.3625	-54.7353	300	926	ana	High
9667	ES_0000056	CAUDAL	PARTEAYER	ES	43.2844444444444	-5.87444444444445	158	893	afd	High
9669	US_0002227	MULBERRY FORK	NEAR GARDEN CITY, AL.	US	34.01204356	-86.73666329	115.99	927.2157	usgs	High
9672	BR_0003200	NA	RESTINGA SECA	BR	-29.8008	-53.3686	30.47	932	ana	High
9673	RU_0000240	SHUYA	SHUYERETSKOYE	RU	64.75	34.7	0.2	934	arcticnet	High
9674	BR_0002543	RIO OCOI	USINA OCOI	BR	-25.2167	-54.4667	354	920	ana	High
9676	US_0000285	DEERFIELD RIVER	AT CHARLEMONT, MA	US	42.626	-72.8541944	157.56	934.9857	usgs	High
9681	CA_0000570	SAUBLE RIVER	AT SAUBLE FALLS	CA	44.6775283813477	-81.2560577392578	NA	913.45	hydat	High
9682	CH_0000103	MAGGIA (TRIB. PO)	LOCARNO, SOLDUNO	CH	46.168	8.774	252	926	grdb	High
9683	US_0006385	COLETO CREEK	AT ARNOLD RD CRSG NEAR SCHROEDER, TX	US	28.86165308	-97.2263791	30.61	924.6258	usgs	High
9684	BR_0003031	RIO CAPIVARI	PRAIA GRANDE	BR	-25.1667	-48.8831	750	912	ana	High
9687	RU_0000224	TITOVKA	15TH KM	RU	69.48	31.8	220	942	ewa	High
9688	IN_0000276	Bharathapuzha	Ambarampalayam	IN	10.5958	76.9542	227	950	wris	High
9689	FR_0000829	CANCHE	BRIMEUX	FR	50.45	1.83	NA	894	ewa	High
9694	US_0000049	CARRABASSETT RIVER	NEAR NORTH ANSON, MAINE	US	44.86916667	-69.955	92.45	914.2658	usgs	High
9697	US_0006374	BLANCO RIVER	AT WIMBERLEY, TX	US	29.9943808	-98.088898	243	919.4458	usgs	High
9699	US_0002661	LITTLE MIAMI RIVER	NEAR SPRING VALLEY OH	US	39.58339358	-84.030211	222.29	947.9356	usgs	High
9701	US_0003598	BLANCHARD RIVER	NEAR FINDLAY OH	US	41.05588646	-83.6879889	229.75	896.1359	usgs	High
9704	GB_0000115	TAMAR	GUNNISLAKE	GB	50.53	-4.221	8.2	916.9	grdb	High
9710	BR_0001771	RIO DESCOBERTO	RIO DESCOBERTO	BR	-16.0081	-48.2719	NA	929	ana	High
9719	BR_0000168	RIO MASSANGANA	NA	BR	-9.7608	-63.2875	NA	852	ana	Medium
9721	ES_0000276	AGUEDA	AGUEDA (EMBALSE)	ES	40.5580555555556	-6.48888888888889	607	900	afd	High
9725	CA_0001486	BECANCOUR RIVER	A 21 KM EN AMONT DE LA RIVER PALMER	CA	46.3061103820801	-71.4513931274414	NA	919	hydat	High
9728	BR_0002616	NA	QUITANDINHA	BR	-25.8703	-49.5017	800	919	ana	High
9731	ZA_0000309	MPULUZI	BUSBY (27632211)	ZA	-26.2797	30.5942	1517	906	grdb	High
9732	BR_0003195	RIO ITOUPAVA	ERMO	BR	-28.9719	-49.6372	12	863	ana	High
9733	BR_0001613	RIO PRETO	MORELI (PARADA MORELI)	BR	-22.1925	-43.0075	518	930	ana	High
9736	RU_0000186	VELESA	RUDNIA	RU	56.05	32.1	208	870	ewa	High
9738	US_0002283	BLACK CREEK	NEAR BROOKLYN, MS	US	31.05194444	-89.2041667	39.06	919.4458	usgs	High
9739	US_0003611	HURON RIVER	AT MILAN OH	US	41.3008852	-82.6082326	174.53	960.8856	usgs	Medium
9740	BR_0002074	NA	FAZENDA SANTA TEREZINHA	BR	-21.2011	-48.0431	NA	907	ana	High
9743	DE_0000374	RHUME	BERKA	DE	51.69	10.11	135.19	894	ewa	High
9744	BR_0001006	NA	BOM JARDIM	BR	-16.1086	-43.8531	519	884	ana	High
9747	BR_0002916	RIO DAS ANTAS	LINHA POLACA	BR	-26.65	-53.4167	400	906	ana	High
9753	SI_0000017	SAVA	RADOVLJICA I	SI	46.34	14.1654	408.09	908	grdb	High
9754	US_0006315	SANDY CREEK	NEAR KINGSLAND, TX	US	30.557689	-98.4722511	262.84	896.1359	usgs	High
9755	CA_0003561	MALIGNE RIVER	NEAR JASPER	CA	52.9308280944824	-118.026107788086	NA	908	hydat	High
9760	BR_0001465	RIO SANTA JOANA	SANTA JOANA	BR	-19.55	-40.7167	NA	897	ana	High
9761	US_0002203	BULL MOUNTAIN CREEK	NEAR SMITHVILLE, MS	US	34.08844049	-88.3905988	71.57	870.236	usgs	High
9766	IN_0000277	Bharathapuzha	Pulamanthole	IN	10.8992	76.1972	22.56	940	wris	High
9767	ES_0000605	GUADAJIRA	GUADAJIRA	ES	38.8530555555556	-6.68833333333333	189	902	afd	High
9773	US_0001991	UPATOI CREEK	NEAR COLUMBUS, GA	US	32.41347774	-84.8199281	70.1	885.7759	usgs	High
9776	BR_0003222	RIO PARDINHO	SANTA CRUZ	BR	-29.7333	-52.4667	20	909	ana	High
9778	GB_0000149	TEIFI	GLAN TEIFI	GB	52.044	-4.561	5.2	893.6	grdb	High
9780	CA_0003953	MORE CREEK	NEAR THE MOUTH	CA	57.040828704834	-130.401382446289	NA	844	hydat	High
9781	US_0005150	MILL CREEK	AT WASHINGTON, KS	US	39.81361476	-97.0375267	384.53	890.9559	usgs	High
9782	SZ_0000024	HLELO	RSA BORDER (68632222)	SZ	-26.7786	30.8103	NA	893	grdb	High
9783	BR_0001464	RIO SANTA JOANA	NA	BR	-19.5586	-40.7325	43	893	ana	High
9787	FR_0001079	VIRE	GOURFALEUR	FR	49.09	-1.1	18.32	868	ewa	High
9790	BR_0002331	NA	NA	BR	-22.7514	-49.735	NA	891	ana	High
9792	CA_0003431	TAYLOR RIVER	NEAR THOMPSON	CA	55.4898490905762	-98.1920776367188	NA	886	hydat	High
9793	CA_0003365	WHITESHELL RIVER	AT OUTLET OF JESSICA LAKE	CA	50.0349197387695	-95.5066680908203	NA	888	hydat	High
9796	US_0004637	OAK CREEK	NEAR WAKPALA,SD	US	45.7119422	-100.5593015	515.12	919.4458	usgs	High
9801	US_0002183	CAHABA RIVER	NEAR HELENA AL	US	33.28455786	-86.8824901	108.77	867.646	usgs	High
9802	US_0002488	BLACK FORK	AT LOUDONVILLE OH	US	40.63589367	-82.2393259	283.21	903.9059	usgs	High
9804	RU_0000357	BOLSHOI KINEL	AZAMATOVO	RU	53.3	53.48	261	908	ewa	High
9807	BR_0001730	NA	NA	BR	-18.1167	-47.6203	650	922	ana	High
9809	BR_0001477	NA	NA	BR	-20.0828	-40.5761	NA	832	ana	Medium
9810	BR_0000524	RIO OURIVES	FAZENDA OURIVES	BR	-5.7794	-45.1736	NA	876	ana	High
9817	CN_0000090	YANG BI JIANG	DIAN NAN	CN	26.45	99.91666667	NA	918	chdp	High
9825	BR_0000871	NA	BARRA DO FUNCHAL	BR	-19.3956	-45.8864	679	897	ana	High
9826	FR_0000817	OUANNE	GY-LES-NONAINS	FR	47.95	2.85	101.56	883	ewa	High
9830	ES_0000191	UCERO	OSMA	ES	41.5766666666667	-3.0825	890	900	afd	High
9831	ES_0000536	GUADIANA	MAGADALENA	ES	38.9947222222222	-2.9075	745	874	afd	High
9836	US_0002278	OKATIBBEE CREEK	AT ARUNDEL, MS	US	32.29833333	-88.7536111	78.96	885.7759	usgs	High
9837	US_0003212	FLINT RIVER	NEAR CHASE AL	US	34.82286756	-86.4830456	195.19	885.7759	usgs	High
9841	DE_0000711	WERRE	HERFORD	DE	52.1334	8.6709	59.66	874	grdb	High
9842	CA_0001138	KIAMIKA RIVER	A CHUTESAINTPHILIPPE	CA	46.6511116027832	-75.2422180175781	NA	883	hydat	High
9843	CA_0004496	CLEARWATER RIVER	AT OUTLET OF HOBSON LAKE	CA	52.4216690063477	-120.323890686035	NA	904	hydat	High
9844	US_0002273	BOGUE HOMO	NEAR RICHTON, MS	US	31.4036111	-89.0216667	35.66	890.9559	usgs	High
9850	US_0005228	MARAIS DES CYGNES RIVER	AT MELVERN, KS	US	38.5161111	-95.6961111	287.13	909.0858	usgs	High
9851	NZ_0000004	TARAWERA	AWAKAPONGA	NZ	-37.9405	176.7669	4	906	grdb	High
9854	ES_0000957	ESERA	GRAUS	ES	42.2066666666667	0.346944444444444	450	893	afd	High
9855	US_0005096	WHITE ROCK CREEK	AT LOVEWELL, KS	US	39.88417866	-98.0225448	466.81	893.5459	usgs	High
9856	US_0005620	HOMINY CREEK	NEAR SKIATOOK, OK	US	36.34869699	-96.1100024	188.87	880.596	usgs	High
9857	CA_0004233	STAMP RIVER	NEAR ALBERNI	CA	49.3349990844727	-124.920829772949	NA	899	hydat	High
9861	CA_0005134	COLUMBIA RIVER	NEAR FAIRMONT HOT SPRINGS	CA	50.3236083984375	-115.862503051758	NA	891	hydat	High
9865	BR_0002947	ARROIO INHACAPETUM	PASSO MAJOR ZEFERINO	BR	-28.7336	-54.6461	160	871	ana	High
9869	US_0008572	BUFFALO FORK	ABOVE LAVA CREEK NEAR MORAN WY	US	43.83805556	-110.4408333	2064.37	836.5662	usgs	High
9870	BR_0001998	RIO MUZAMBO	NA	BR	-21.2789	-46.3608	859	884	ana	High
9871	US_0002390	DRY FORK	AT HENDRICKS, WV	US	39.07232928	-79.6228373	517.94	903.9059	usgs	High
9872	ZA_0000165	BISIRIVIER	NOOITGEDACHT (27663102)	ZA	-30.4036	29.8944	600	873	grdb	High
9873	BR_0003261	RIO CADEIA	COSTA DO RIO CADEIA	BR	-29.6072	-51.3511	20	870	ana	High
9875	US_0005097	BUFFALO CREEK	NEAR JAMESTOWN, KS	US	39.6145692	-97.8568182	418.7	854.6961	usgs	High
9879	DE_0000062	ILM	NIEDERTREBRA	DE	51.0718	11.5793	133.4	894.3	grdb	High
9881	FR_0000889	ESSONNE	LA MOTHE	FR	48.46	2.35	NA	875	ewa	High
9882	ES_0000716	GUADIAMAR	AZNALCAZAR PUENTE	ES	37.3041666666667	-6.25861111111111	21	960	afd	Medium
9886	CA_0004182	COWICHAN RIVER	NEAR DUNCAN	CA	48.7330284118652	-123.714622497559	NA	826	hydat	High
9889	US_0006076	BIG SANDY CREEK	NEAR BRIDGEPORT, TX	US	33.23178218	-97.6947538	220.81	862.466	usgs	High
9890	FR_0001029	AVRE	MUZY	FR	48.76	1.33	80.93	880	ewa	High
9891	NO_0000111	JORA	AULESTAD	NO	61.215601	10.270894	200	866	ewa	High
9892	CA_0001428	GOUFFRE RIVER	DU A BAIESAINTPAUL	CA	47.4474983215332	-70.5105590820312	NA	865	hydat	High
9893	FR_0000592	LOIRE	BRIVES-CHARENSAC	FR	45.04	3.93	NA	867	ewa	High
9896	FR_0001118	SARRE	KESKASTEL	FR	48.97	7.04	NA	878	ewa	High
9900	ZA_0000031	CORNELIUSRIVIER	C8H003 (27817803)	ZA	-27.8478	28.945	1091	864	grdb	High
9905	US_0001657	MIDDLE OCONEE RIVER	NEAR ARCADE, GA	US	34.03166667	-83.5633333	200.07	859.8761	usgs	High
9906	US_0001836	ALAFIA RIVER	AT LITHIA FL	US	27.872248	-82.2112008	1.84	867.646	usgs	High
9908	ES_0000522	GUADIANA	CUBETA, LA	ES	38.9788888888889	-2.89194444444444	758	856	afd	High
9909	US_0002167	UPHAPEE CREEK	NEAR TUSKEGEE AL	US	32.4768045	-85.69495359	68.17	862.466	usgs	High
9912	BR_0001985	RIO DO PEIXE	NA	BR	-21.6783	-45.2597	832	854	ana	High
9914	GB_0000034	TEES	BROKEN SCAR	GB	54.518	-1.6	37.2	818.4	grdb	High
9916	FR_0000352	SEUGNE	PONS TOTAL 3 STATIONS	FR	45.58	-0.54	11.15	882	ewa	High
9921	US_0005586	COTTONWOOD CREEK	NEAR SEWARD, OK	US	35.81366006	-97.478097	285.45	828.7962	usgs	High
9923	US_0007062	SAN FRANCISCO RIVER	NEAR RESERVE, NM	US	33.73671944	-108.771175	1773.96	906.4958	usgs	High
9924	FR_0000382	SEVRE NANTAISE	TIFFAUGES (LA MOULINETTE)	FR	47.0172	-1.1162	98.66	814	grdb	High
9927	CA_0004501	BRIDGE CREEK	AT OUTLET OF HORSE LAKE	CA	51.6069412231445	-121.230560302734	NA	912	hydat	Medium
9928	BR_0000098	NA	NA	BR	0.6194	-66.135	NA	886	ana	High
9931	GB_0000225	WHARFE	TADCASTER	GB	53.88	-1.27	NA	818	grdb	High
9932	FR_0000814	VANNE	PONT SUR VANNE	FR	48.18	3.44	NA	866	ewa	High
9933	RU_0000192	LEMOVZHA	HOTNEZHA	RU	59.13	29.3	98	948	ewa	Medium
9936	IS_0000011	VESTARI-JOEKULSA, SKAGAFIROI	GOODALABRU	IS	65.3306	-19.0853	150	841	grdb	High
9938	CA_0004401	KAZCHEK CREEK	NEAR THE MOUTH	CA	54.9002799987793	-125.138061523438	NA	881	hydat	High
9939	US_0005235	POTTAWATOMIE CREEK	NEAR GARNETT, KS	US	38.333631	-95.2488634	266.16	865.056	usgs	High
9940	US_0006352	NAVIDAD RIVER	NEAR HALLETTSVILLE, TX	US	29.466908	-96.812756	48.55	859.8761	usgs	High
9942	BR_0000356	RIO PRETO	PONTE RIO PRETO	BR	-13.9881	-47.9289	452	878	ana	High
9943	ZA_0000203	NGAGANE	BALLENGEICH (27661403)	ZA	-27.9231	29.9492	1245	857	grdb	High
9944	US_0000005	MACHIAS RIVER	NEAR ASHLAND, ME	US	46.6283111	-68.4347917	163.07	852.1061	usgs	High
9953	FR_0000989	OISE	MONCEAU SUR OISE	FR	49.9	3.7	102.22	852	ewa	High
9959	FR_0000570	TARDES	EVAUX-LES-BAINS	FR	46.1835	2.4444	387.13	854	grdb	High
9960	US_0008483	NF COEUR D ALENE RIVER	ABOVE SHOSHONE CREEK NEAR PRICHARD ID	US	47.7061111	-115.9791667	757.44	867.646	usgs	High
9961	BR_0000378	RIO CANABRAVA	FAZENDA SALINA	BR	-13.1997	-49.1497	NA	878	ana	High
9962	BR_0001297	NA	NA	BR	-17.1875	-39.9822	NA	878	ana	High
9963	BR_0001946	NA	NA	BR	-22.4333	-45.45	840	870	ana	High
9964	BR_0002957	RIO TOROPI	USINA QUEBRA DENTE	BR	-29.3833	-54.0167	160	864	ana	High
9965	FR_0000312	PETITE CREUSE	FRESSELINES (PUY RAGEAUD)	FR	46.385	1.6885	271.61	850	grdb	High
9967	CR_0000014	VIRILLA	SAN MIGUEL	CR	9.92	-84.32	407	829	grdb	High
9968	US_0003653	CANASERAGA CREEK	AT SHAKERS CROSSING NY	US	42.73694444	-77.8405556	166.28	867.646	usgs	High
9969	PT_0000006	DEGEBE	VENDINHA	PT	38.46	-7.68	162	815	ewa	High
9970	US_0000067	LITTLE ANDROSCOGGIN RIVER	NEAR AUBURN, ME	US	44.0638722	-70.2740694	63.74	849.5161	usgs	High
9973	RU_0000188	KEREST	SIABRENITSY	RU	59.13	31.63	45	833	ewa	High
9975	BR_0002786	RIO TENENTE AMARAL	JACIARA	BR	-15.9833	-54.9333	277	853	ana	High
9977	CN_0000159	NAN KANG HE	NAN KANG HE	CN	22.7	99.51666667	NA	920	chdp	Medium
9982	US_0006163	E FK SAN JACINTO RIVER	NEAR CLEVELAND, TX	US	30.33659809	-95.1040999	32.91	841.7461	usgs	High
9983	US_0000033	SEBEC RIVER	AT SEBEC, MAINE	US	45.27	-69.1122222	90.31	844.3361	usgs	High
9984	BR_0001382	NA	NA	BR	-19.7086	-42.4456	NA	855	ana	High
9985	CA_0005935	LITTLE SOUTH KLONDIKE RIVER	BELOW ROSS CREEK	CA	63.9958305358887	-137.572219848633	NA	860	hydat	High
9986	US_0006954	LA PLATA RIVER	AT LA PLATA, NM	US	36.93091667	-108.1846389	1748.35	909.0858	usgs	Medium
9988	DE_0000418	HUNTE	HOOPEN	DE	52.65	8.41	33.19	764	ewa	Medium
9989	CA_0001295	SAUMON RIVER	AU PRES DE LA RIVER SAINTFRANCOIS	CA	45.6216697692871	-71.3933334350586	NA	839	hydat	High
9990	GB_0000051	DOVE (TRIB. TRENT)	MARSTON ON DOVE	GB	52.856	-1.651	47.2	883.2	grdb	High
9994	CA_0004800	COLDWATER RIVER	AT MERRITT	CA	50.1097984313965	-120.803001403809	NA	917	hydat	Medium
9995	CA_0002540	NORDEGG RIVER	AT SUNCHILD ROAD	CA	52.8199691772461	-115.520263671875	NA	875.7	hydat	High
9996	BR_0003176	NA	PEDRAS GRANDES	BR	-28.4347	-49.1831	40	822	ana	High
9998	BR_0002467	NA	SALTO NATAL	BR	-24.0331	-52.2667	617	853	ana	High
10000	CA_0002516	PRAIRIE CREEK	NEAR ROCKY MOUNTAIN HOUSE	CA	52.2738609313965	-114.929176330566	NA	844.1	hydat	High
10004	ZW_0000054	SHAGASHI	KYLE DAM U/S G/W (63423369)	ZW	-20.1167	30.8667	NA	847	grdb	High
10006	US_0001801	CHARLIE CREEK	NEAR GARDNER FL	US	27.37504297	-81.7964708	6.6	854.6961	usgs	High
10008	DE_0000100	GERA	ERFURT-MOEBISBURG	DE	50.926	10.989	NA	842.8	ewa	High
10009	BR_0001945	NA	NA	BR	-22.4433	-45.4294	843	869	ana	High
10011	US_0002642	DEER CREEK	AT WILLIAMSPORT OH	US	39.58589537	-83.122687	218.86	862.466	usgs	High
10013	PL_0000065	SKAWA	WADOWICE	PL	49.883	19.483	255	836	grdb	High
10015	CA_0005043	CHILLIWACK RIVER	BELOW SLESSE CREEK	CA	49.0816688537598	-121.720558166504	NA	860	hydat	High
10017	CA_0004739	DEADMAN RIVER	ABOVE CRISS CREEK	CA	50.8980712890625	-120.975982666016	NA	878	hydat	High
10027	US_0005600	FALL RIVER	NEAR EUREKA, KS	US	37.78505515	-96.2348096	301.3	795.1263	usgs	High
10028	CA_0001022	YORK RIVER	NEAR BANCROFT	CA	45.0521392822266	-77.8460311889648	NA	844.48	hydat	High
10030	US_0005906	MOUNTAIN FORK	AT SMITHVILLE, OK	US	34.4623262	-94.6352202	202.6	833.9762	usgs	High
10033	US_0004866	LITTLE LARAMIE RIVER	AT TWO RIVERS, WYO.	US	41.4685849	-105.732771	2152.1	823.6162	usgs	High
10035	ZW_0000059	MUTIRIKWI	KYLE DAM U/S G/W (63423345)	ZW	-20.0833	31.0667	NA	835	grdb	High
10036	CR_0000007	SARAPIQUI	PUERTO VIEJO	CR	10.47	-84	22	821	grdb	High
10037	RU_0000335	VELVA	OSHIB	RU	59.22	54.88	188	836	ewa	High
10039	FR_0000655	HUISNE	NOGENT LE ROTROU	FR	48.32	0.81	NA	827	ewa	High
10040	US_0004729	LITTLE WHITE RIVER	NEAR MARTIN,SD	US	43.1669155	-101.6327322	928.13	774.4064	usgs	Medium
10042	US_0001994	UCHEE CREEK	NEAR FORT MITCHELL, AL.	US	32.31681467	-85.014931	61.5	833.9762	usgs	High
10045	IN_0000284	Pamba	Thumpamon	IN	9.2325	76.7	12.89	810	wris	High
10049	BR_0002307	RIO TAQUARI	ITAPEVA	BR	-23.9614	-48.9497	639	836	ana	High
10053	ES_0000121	LADRA	BEGONTE	ES	43.1497222222222	-7.68861111111111	395	843	afd	High
10054	BR_0002391	RIO TAQUARA	NA	BR	-23.5606	-51.0303	390	820	ana	High
10055	CA_0006316	ROCK CREEK	BELOW HORSE CREEK NEAR INTERNATIONAL BOUNDARY	CA	48.9694404602051	-106.838890075684	NA	837	hydat	High
10058	SK_0000031	TURIEC	MARTIN	SK	49.0694	18.9125	390	827	grdb	High
10059	CO_0000035	CHITAGA	PTE.LOPEZ	CO	7.2	-72.63	1860	872	grdb	High
10060	CR_0000021	GENERAL	LA CUESTA	CR	9.23	-83.6	475	836	grdb	High
10061	CA_0004346	NIMPKISH RIVER	ABOVE WOSS RIVER	CA	50.2148284912109	-126.610809326172	NA	783	hydat	Medium
10062	GB_0000120	TAW	UMBERLEIGH	GB	50.995	-3.984	14.1	826.2	grdb	High
10063	CA_0001998	TATACHIKAPIKA RIVER	NEAR TIMMINS	CA	48.329719543457	-81.5801696777344	NA	872	hydat	High
10065	ES_0000910	TURIA O GUADALAVIAR	ARQUILLO SAN BLAS SALIDA E.	ES	40.3605555555556	-1.195	918	815	afd	High
10066	US_0004674	RAPID CREEK	BELOW PACTOLA DAM,SD	US	44.07665378	-103.482134	1343.52	831.3862	usgs	High
10076	FR_0000970	VESLE	CHALONS SUR VESLE	FR	49.28	3.92	NA	828	ewa	High
10077	US_0000034	PLEASANT RIVER	NEAR MILO, ME	US	45.28257778	-69.00343889	92.05	836.5662	usgs	High
10080	BR_0001223	NA	FAZENDA MANAUS	BR	-15.1531	-39.7692	180	827	ana	High
10083	BR_0003160	NA	BOTUVERA	BR	-27.1833	-49.0667	70	836	ana	High
10086	ES_0000001	SIL	PUENTE QUEROL	ES	42.5433333333333	-6.59527777777778	490	833	afd	High
10087	CA_0002423	JAMES RIVER	NEAR SUNDRE	CA	51.9267883300781	-114.685516357422	NA	821.4	hydat	High
10091	CA_0004999	GREEN RIVER	NEAR PEMBERTON	CA	50.2819404602051	-122.851387023926	NA	855	hydat	High
10093	CA_0000817	HUMBER RIVER	AT WESTON	CA	43.6989402770996	-79.520393371582	NA	802.04	hydat	High
10094	GB_0000185	LEVEN (SCOTLAND)	LINNBRANE	GB	55.989	-4.575	5.3	784.3	grdb	High
10095	FR_0000615	BOURBINCE	VITRY-EN-CHAROLLAIS	FR	46.4749	4.0764	287.75	819	grdb	High
10098	BR_0000782	NA	FAZENDA DA BARRA	BR	-20.1833	-46.2167	NA	830	ana	High
10099	BR_0000581	RIO CONTRATO	NA	BR	-9.58	-45.0292	381	750	ana	Medium
10102	HN_0000001	GRANDE DE OTORO	LA GLORIA	HN	14.44	-87.97	NA	836	grdb	High
10103	US_0005904	GLOVER RIVER	NEAR GLOVER, OK	US	34.09760677	-94.9021667	115.43	828.7962	usgs	High
10104	BR_0001917	RIO ELVAS	PORTO DO ELVAS	BR	-21.1647	-44.1358	880	828	ana	High
10107	CA_0002047	CASTLE RIVER	NEAR BEAVER MINES	CA	49.4886589050293	-114.144378662109	NA	820.7	hydat	High
10108	BR_0002499	RIO MARACAI	NA	BR	-23.4289	-54.4014	272	833	ana	High
10111	ES_0000125	NEIRA	PARAMO, EL	ES	42.8730555555556	-7.52611111111111	355	831	afd	High
10112	ZA_0000239	SELATI	MASUNGA RIVER (27521008)	ZA	-24.0092	30.6722	491	841	grdb	High
10113	CA_0002272	ROSS CREEK	AT HIGHWAY NO 41	CA	50.0055694580078	-110.532913208008	NA	808.4	hydat	High
10117	BR_0000767	RIO CAMARAGIBE	MATRIZ DE CAMARAGIBE II	BR	-9.1592	-35.5397	NA	805	ana	High
10122	BR_0001868	RIO DA PRATA	PONTE BR-153 (FAZ. N0SSA SENHORA APARECIDA)	BR	-19.5019	-48.8586	NA	830	ana	High
10123	US_0006139	BEDIAS CREEK	NEAR MADISONVILLE, TX	US	30.8847222	-95.7777778	45.72	831.3862	usgs	High
10125	ZA_0000180	KLAAS SMITSRIVIER	DOORNHOEK (27711502)	ZA	-31.7442	26.5839	1219	812	grdb	High
10126	US_0003210	PAINT ROCK RIVER	NEAR WOODVILLE AL	US	34.6242547	-86.3063737	174.03	828.7962	usgs	High
10128	BR_0002012	NA	NA	BR	-20.9833	-47.25	NA	825	ana	High
10129	CA_0005427	LARDEAU RIVER	AT GERRARD	CA	50.5099983215332	-117.274719238281	NA	769	hydat	Medium
10132	IT_0000139	FIORA	MONTALTO_DI_CA	IT	42.35	11.62	NA	818	ewa	High
10133	US_0006509	EMBUDO CREEK	AT DIXON, NM	US	36.21085556	-105.9136306	1785.72	789.9464	usgs	High
10135	CA_0000473	SOUTH RIVER	NEAR NIPISSING	CA	46.0969390869141	-79.4791717529297	NA	787	hydat	High
10138	US_0001944	CHATTAHOOCHEE RIVER	NEAR CORNELIA, GA	US	34.5407222	-83.622775	343.98	815.8463	usgs	High
10139	US_0001004	N F SOUTH BRANCH POTOMAC RIVER	AT CABINS, WV	US	38.9845546	-79.2336508	318.65	802.8963	usgs	High
10142	RU_0000317	ISTJA	POPOVITCHI	RU	54.27	40.08	160	816	ewa	High
10143	BR_0002915	RIO DAS ANTAS	GUATAPARA DE BAIXO	BR	-26.5881	-53.4536	NA	814	ana	High
10145	FR_0000497	MARONNE	BASTEYROUX	FR	45.08	1.95	177.79	821	ewa	High
10148	US_0006346	ONION CREEK	AT US HWY 183, AUSTIN, TX	US	30.17798987	-97.6886138	134.98	831.3862	usgs	High
10151	CA_0003987	PINKUT CREEK	NEAR TINTAGEL	CA	54.4054412841797	-125.429817199707	NA	808	hydat	High
10152	US_0008778	PALOUSE RIVER	NEAR POTLATCH, ID	US	46.91527778	-116.951111	748.33	821.0262	usgs	High
10153	FR_0000942	VOIRE	LASSICOURT	FR	48.45	4.49	NA	896	ewa	Medium
10154	DE_0000511	JAGST	ELPERSHOFEN	DE	49.23	9.9	304.35	816.3	ewa	High
10155	RU_0000308	MERA	MALOBEREZOVO	RU	57.72	42.25	150	820	ewa	High
10157	BR_0001855	RIO MONTE ALEGRE	FAZENDA MONTE ALEGRE	BR	-17.3308	-50.7742	NA	808	ana	High
10159	CA_0001444	SUD RIVER	DU A ARTHURVILLE	CA	46.8277816772461	-70.758056640625	NA	826	hydat	High
10160	BR_0002479	NA	NA	BR	-23.4414	-52.6047	285	818	ana	High
10163	ES_0000441	GUADARRAMA	NAVALCARNERO	ES	40.3005555555556	-3.94	559	798	afd	High
10164	CA_0001450	DU SUD RIVER	A 10 KM EN AMONT DU PONTROUTE A ARTHURVILLE	CA	46.8205604553223	-70.7569427490234	NA	821	hydat	High
10165	IE_0000053	MAIGUE	CASTLEROBERTS	IE	52.5336	-8.7672	NA	806	grdb	High
10166	BR_0002308	RIO TAQUARI	ITAPEVA	BR	-23.9833	-48.9167	649	814	ana	High
10168	BR_0001362	RIO GUALAXO DO SUL	NA	BR	-20.3903	-43.1819	388	855	ana	High
10169	ES_0000204	ODRA	PEDROSA DEL PRINCIPE	ES	42.2525	-4.20027777777778	766	796	afd	High
10171	ES_0000934	GUADAZAON	HUERMECES	ES	39.7216666666667	-1.70305555555556	790	761	afd	Medium
10172	BR_0002930	RIO COMANDAI	NA	BR	-28.0631	-54.7558	700	817	ana	High
10173	CA_0000645	CONESTOGO RIVER	NEAR CONESTOGO	CA	43.5244407653809	-80.5152816772461	NA	821	hydat	High
10174	CA_0000812	CREDIT RIVER	AT STREETSVILLE	CA	43.5822792053223	-79.7087478637695	NA	774.24	hydat	High
10180	FR_0000895	ORNAIN	FAINS LES SOURCES	FR	48.8	5.13	181.92	820	ewa	High
10181	TZ_0000010	LITTLE RUAHA	MAKALALA (55232332)	TZ	-8.3333	35.3333	NA	743	grdb	Medium
10182	BR_0002867	RIO CAVEIRAS	NA	BR	-27.8833	-50.3833	920	800	ana	High
10185	IT_0000177	ELSA	CASTELFIORENTI	IT	43.6	10.97	NA	806	ewa	High
10186	CA_0001433	OUELLE RIVER	A LA ROUTE NO 230	CA	47.4197196960449	-69.9494400024414	NA	802	hydat	High
10190	BR_0002935	NA	NA	BR	-28.4544	-53.9731	160	811	ana	High
10191	FR_0001327	AZERGUES	LOZANNE	FR	45.8577	4.687	245.23	792	grdb	High
10195	US_0004708	INDIAN CREEK	NEAR ARPAN SD	US	44.8141527	-103.68992	883.93	808.0763	usgs	High
10196	IN_0000039	Kim	Motinaroli	IN	21.4044	72.9625	5	804	wris	High
10197	BR_0001662	RIO NOVO	RIO NOVO	BR	-21.4739	-43.1289	397	835	ana	High
10199	BR_0002316	RIO JAGUARIAIVA	JAGUARIAIVA	BR	-24.2667	-49.7	840	790	ana	High
10200	CA_0000620	AUSABLE RIVER	NEAR SPRINGBANK	CA	43.0719184875488	-81.6597518920898	NA	865.41	hydat	Medium
10201	US_0006995	CLEAR CREEK	BELOW WILLOW CREEK, N WINSLOW, AZ.	US	34.66752554	-111.0076349	1815.72	821.0262	usgs	High
10203	VE_0000006	PAGUEY	EL PASO	VE	8.51	-70.46	187	810	grdb	High
10210	BR_0002876	RIO DO PEIXE	RIO DAS ANTAS	BR	-26.8958	-51.0756	840	801	ana	High
10212	ZA_0000133	BAVIAANSRIVIER	BOTMANSGAT (27673403)	ZA	-32.6058	25.8844	630	806	grdb	High
10213	CA_0001597	ESCOUMAINS RIVER	DES A ESCOUMAINS	CA	48.3386116027832	-69.4380569458008	NA	793	hydat	High
10215	ZA_0000211	LITTLE TUGELA	WINTERTON (27661710)	ZA	-28.8181	29.545	1018	779	grdb	High
10216	FR_0000704	SEICHE	CARCE EN BRUZ	FR	48.02	-1.72	18.03	820	ewa	High
10218	US_0006075	BIG SANDY CREEK	NEAR CHICO, TX	US	33.27428117	-97.6786424	222.17	808.0763	usgs	High
[truncated: 5,265 more rows]
