# Supplementary material for: GRUN: an observation-based global gridded runoff dataset from 1902 to 2014
Source: Copernicus journal article supplement (doi:10.5194/essd-11-1655-2019), 2019-11-13
Supplement: Supplementary file 3 [file essd-11-1655-2019-supplement.zip › Supplementary Material/KG_CV_SPACE_Skills.csv]

KG "Monthly_NSE_Q25" "Monthly_NSE_Q50" "Monthly_NSE_Q75" "Monthly_R2_Q25" "Monthly_R2_Q50" "Monthly_R2_Q75" "Monthly_R2_std_anom_Q25" "Monthly_R2_std_anom_Q50" "Monthly_R2_std_anom_Q75" "Monthly_relBIAS_Q25" "Monthly_relBIAS_Q50" "Monthly_relBIAS_Q75" "Monthly_rSD_Q25" "Monthly_rSD_Q50" "Monthly_rSD_Q75" "R2_monthly_clim_Q25" "R2_monthly_clim_Q50" "R2_monthly_clim_Q75"
1 "Af" -0.142940367742521 0.272622455580941 0.487945351918892 0.358549698500636 0.552862118350166 0.646368192158535 0.179307721874761 0.280962179619852 0.369599461565398 -0.3525662192251 -0.166751629845293 -0.0139281075373716 0.570003960743287 0.777993904929474 0.925559561550432 0.784845192713947 0.910528344141706 0.96021188047442
2 "Am" 0.0935571715824494 0.446958819948661 0.689638582787801 0.55408431212215 0.694915019815181 0.790247426116204 0.206947515023162 0.328863936839063 0.46791798032526 -0.388168987619642 -0.176141759919335 0.0614340660419707 0.60128789214583 0.842509439383042 1.03802504395506 0.91928617718928 0.957752237599472 0.984682190866314
3 "Aw" -0.0134620324901414 0.496858976447955 0.690233540509226 0.565395606276393 0.692635913779828 0.775307255408357 0.225503201927169 0.361373491298747 0.482521820442303 -0.311854401262312 -0.113686749840302 0.119073104614294 0.641929151719438 0.880004751229656 1.1891114658845 0.874456965527903 0.946468043282405 0.980085582425997
4 "BSh" -0.0691276262882956 0.317371193026354 0.508021104749222 0.36816024511699 0.518193028723377 0.669233160000535 0.256328369022304 0.383920768595091 0.488329878133173 -0.426718062179112 -0.0790392680110956 0.428584996190281 0.508863391533296 0.717665168142602 1.16876792115799 0.683884090002088 0.815332180050265 0.921612828650916
5 "BSk" -0.850390138283569 0.164380360287242 0.403102950339941 0.284234813353409 0.500953098494072 0.593960413711329 0.191400421437456 0.315466703390091 0.461192395482099 -0.368265310487558 0.0338096079016486 0.703107298043412 0.493302717205669 0.844380918714742 1.54864340820821 0.477417457191525 0.735431665969372 0.865343774274939
6 "BWh" -0.25076702195352 0.0114090998690064 0.200136890392244 0.211137168044654 0.325570972907722 0.511609880686536 0.233976831706778 0.350198385537694 0.45747179404009 -0.719207087373005 -0.369437477334399 0.0582419313120263 0.180897583047978 0.478661335845475 0.977047992668447 0.390321630131188 0.687941012619007 0.861719558205813
7 "Cfa" 0.489894608478213 0.707087970525538 0.811409052180426 0.634179151942273 0.767564543997531 0.846916907616604 0.576329413664843 0.704132478330728 0.780646735599989 -0.2159115256647 -0.119689856121331 -0.0433273651164435 0.698743439045556 0.836130133259641 0.967207354493219 0.846895302450879 0.950474716271921 0.984640889061787
8 "Cfb" 0.307556369012298 0.660010230205335 0.813163264123036 0.608799408511867 0.776023429476721 0.859408351693938 0.492197243510362 0.653691013904496 0.752233209820298 -0.241572951010888 -0.0541831883167046 0.0959458303236378 0.689164490588604 0.860635545260675 1.03675025702413 0.89001482979115 0.960930931550317 0.985304665421824
9 "Csa" -0.254940807260894 0.184771926591479 0.561223968770155 0.537286883022693 0.629496024762485 0.750101733136857 0.264430513056002 0.385886055811184 0.520439376662972 -0.580233459348779 -0.278386221807836 0.0906458889268225 0.489338580625105 0.716919369874578 1.21881101379889 0.779384551755749 0.87245282106265 0.923222807326987
10 "Csb" -0.257369678548478 0.466917853545958 0.660522193038642 0.375627407802877 0.685524678110557 0.795678071480021 0.303076692703853 0.472414190888166 0.598814743602091 -0.345033921457077 -0.0957865914875559 0.178011426256038 0.63522072214517 0.866573776740223 1.07385798269748 0.702717864265894 0.925496918215547 0.980776668023569
11 "Cwa" 0.139967532740803 0.463983401876901 0.629866305821337 0.603811848375779 0.700890380797761 0.795801003718001 0.242486404406634 0.369701351430494 0.517272387606288 -0.329431793396112 -0.086000560731721 0.201717859431288 0.622913137640394 0.940093772640983 1.23469744838826 0.921782247777119 0.95652032969839 0.984829990432625
12 "Cwb" 0.289394892368494 0.557873766330986 0.70562698949107 0.611366079969287 0.710621863211508 0.800689792734849 0.359908156210645 0.498824316493789 0.571940403100004 -0.236817481933974 -0.0571889328680357 0.207788445846423 0.707847781432226 0.934974655772053 1.1397836894011 0.92317316772816 0.970184870614797 0.987849536491999
13 "Dfa" 0.447764350774349 0.69315305967531 0.794889880998938 0.541992003449151 0.75079704495178 0.826184742806938 0.420515154850546 0.664318938197285 0.773906553563278 -0.22379923700867 -0.0998641752778765 -0.00853459627782381 0.722073296318229 0.832482592247664 0.992289247028631 0.764185798695014 0.921961594485699 0.964668146680994
14 "Dfb" 0.442416466904297 0.665470760646912 0.788347695943343 0.621280888661652 0.759749552458763 0.843204062185438 0.407878617038247 0.574771882685403 0.685055610052294 -0.229256503904997 -0.112960145333117 0.0128211632443429 0.670324359249005 0.779891424403294 0.91521157985543 0.86417656135352 0.946467024972577 0.978834042550926
15 "Dfc" 0.485815652259823 0.681826314215081 0.82019895384667 0.651976922345991 0.777437960831614 0.874380288292854 0.336749292153559 0.529463601411418 0.684434925812225 -0.255915603901267 -0.140805820394479 -0.0372013670486587 0.648619949935633 0.789394676740749 0.935543643158879 0.860511161055682 0.948814028457449 0.978932438573418
16 "Dsb" -0.0407434788317103 0.290676409412164 0.565691850486569 0.440907552592996 0.59219112318575 0.707940280330472 0.138354089274896 0.230005120320149 0.371988085551846 -0.422135374746745 -0.257587239768254 0.283403659280279 0.515580967380574 0.671797479692379 1.07719181764184 0.647392438221066 0.846590710781151 0.930553149539549
17 "ET" 0.337252044974931 0.618707784249511 0.782118613818382 0.518861954880574 0.717055089469699 0.875741342439765 0.397263269678504 0.505016853047574 0.736364915968506 -0.299251652598755 -0.138713388221183 -0.0716569803876917 0.594004101469043 0.761594231455933 0.897409880926992 0.709558103859705 0.890969220066948 0.960907894924354
