# Supplementary material for: GRUN: an observation-based global gridded runoff dataset from 1902 to 2014
Source: Copernicus journal article supplement (doi:10.5194/essd-11-1655-2019), 2019-11-13
Supplement: Supplementary file 3 [file essd-11-1655-2019-supplement.zip › Supplementary Material/SREX_CV_SPACE_Skills.csv]

Monthly_NSE_Q25 "Monthly_NSE_Q50" "Monthly_NSE_Q75" "Monthly_R2_Q25" "Monthly_R2_Q50" "Monthly_R2_Q75" "Monthly_R2_std_anom_Q25" "Monthly_R2_std_anom_Q50" "Monthly_R2_std_anom_Q75" "Monthly_relBIAS_Q25" "Monthly_relBIAS_Q50" "Monthly_relBIAS_Q75" "Monthly_rSD_Q25" "Monthly_rSD_Q50" "Monthly_rSD_Q75" "R2_monthly_clim_Q25" "R2_monthly_clim_Q50" "R2_monthly_clim_Q75" "SREX_region"
1 0.493615423657682 0.751461382718459 0.842300258375212 0.727926252850295 0.822439870193582 0.896996260484296 0.189365062995693 0.540563784025684 0.772944766701973 -0.306453707702618 -0.199439345677076 -0.0859648767971162 0.632792531165834 0.758890613087954 0.902358312420859 0.889533056636017 0.946233737054473 0.97702528423651 "ALA"
2 -0.936636801279401 0.438060667053257 0.675089764571594 0.545562059106192 0.676444078131645 0.757879130478622 0.129053277544089 0.287662014136438 0.403021255594756 -0.28080608048789 -0.137786695459012 0.00837320613417433 0.726854631172982 0.97936522902068 1.27771504186023 0.864479263371658 0.945103542877406 0.975362823180033 "AMZ"
3 0.0265290294000817 0.320406764585906 0.523639025305058 0.455239872950231 0.602734112509204 0.723622487017613 0.226104643853778 0.308656905719139 0.401857425407567 -0.472945787820332 -0.253798327367701 -0.0326795555704788 0.502931113769975 0.704773394060498 0.914118633908188 0.758447624411389 0.907712227635478 0.951646252743378 "CAM"
4 0.407264918898495 0.660715432943255 0.800321511985663 0.626557010350594 0.753300375413119 0.849587021399252 0.517129846163856 0.640556877863816 0.74451320051871 -0.165671168716236 -0.0487831465473547 0.0944197901541884 0.728718103174777 0.85536801286206 1.03029844682818 0.879891872686289 0.950559961464638 0.980187998673818 "CEU"
5 0.455772718603945 0.66507124600345 0.842597968751554 0.616316800182434 0.781100383401426 0.889065736603862 0.360052219445717 0.562174620018055 0.723901694772183 -0.271269436814478 -0.127446852411369 -0.0161174414610243 0.662430475170609 0.807197128897535 0.928205782266151 0.837757849694499 0.95273890622536 0.979725618963043 "CGI"
6 0.468353871315264 0.682676077975408 0.796026822510194 0.563652960080435 0.732872576593345 0.829805541427338 0.464877729117003 0.657884457792513 0.762971836179108 -0.2122171972223 -0.10326702702366 -0.0067248095596776 0.687770468774709 0.828500098274451 0.940327191650605 0.76903059253469 0.918927305766567 0.97506832510549 "CNA"
7 -2.06926687023785 -0.360846277529303 0.306533543585598 0.404861857624489 0.580664018536233 0.661593279500357 0.127201208758347 0.264727153129612 0.358524424750914 -0.419434826374594 -0.0479498535125209 0.998314590401735 0.641162145545112 1.09639990363907 1.88106153451516 0.721245843826013 0.888911283401438 0.942857986882311 "EAF"
8 0.402342239252959 0.557142524759068 0.75684614985955 0.751502275973493 0.786197381711572 0.862330156933429 0.193655569174129 0.368579349322418 0.530030505856952 -0.417541528992375 -0.292129748183713 -0.0819983537261118 0.557421541903065 0.719980592609499 0.926422094883601 0.942223541929628 0.958510304558637 0.976630301632946 "EAS"
9 0.668944223514682 0.762933933818307 0.831327792124403 0.757804886521394 0.820984483142138 0.858945074177274 0.5714502917236 0.669366296824854 0.744729739504291 -0.187959605888638 -0.119475974310962 -0.0554468202945576 0.744590923063529 0.809770172190068 0.924353590425472 0.924963013939023 0.965504139828466 0.983921259539967 "ENA"
10 -0.089268618155856 0.38947205031617 0.628959663994004 0.477236002163541 0.650755897425805 0.761791778671845 0.305130625928651 0.437286708399089 0.573299568515133 -0.498244605780843 -0.22099093017632 0.0840219810455265 0.530613694218639 0.748792654837012 1.03793273493704 0.769907195814567 0.895986832835195 0.955731784256526 "MED"
11 0.578939064902675 0.794234538593153 0.878777580304367 0.768742876567888 0.872864725220598 0.931523341354727 0.368513389629214 0.581386020107208 0.742063033935406 -0.252452375902723 -0.139888461203777 -0.060673737864676 0.653135832754731 0.738727469712359 0.835787700638616 0.966223613069913 0.988997500494665 0.995693668817312 "NAS"
12 -0.0623333116500626 0.505742729785405 0.696760115176348 0.572895533256534 0.70557217613943 0.784385771648844 0.280385999394004 0.403960544084293 0.524495781007768 -0.223586488908494 -0.0449559536646558 0.250080963403909 0.770939082208736 0.980768456046968 1.38059182668338 0.868789680405776 0.947425915893302 0.981725548955119 "NEB"
13 0.510515060898583 0.697396066118179 0.817403601791431 0.700713942083102 0.805708314758882 0.870621644329423 0.510335578345956 0.639378683225166 0.737697098310004 -0.230704321523944 -0.120604050372538 0.00151344869380352 0.661227008001665 0.810098704132599 0.961749937193947 0.906861610974033 0.961247452442689 0.983645878811212 "NEU"
14 0.0608040187694173 0.35414987379048 0.563683889988327 0.44672484258398 0.590510010485557 0.696242762553628 0.309527855485185 0.461192395482099 0.553159935256029 -0.351827286974799 6.73862647287688e-05 0.456353438259307 0.552990402078304 0.7658126184903 1.1779938013386 0.763949052150214 0.892123468166421 0.954864436839835 "SAF"
15 0.156246452919221 0.496313045195716 0.685713691373313 0.528051852222175 0.691564288361544 0.811846666560997 0.209876278335252 0.353481602215382 0.512751269301052 -0.478120997832448 -0.270149918903979 -0.044534617771698 0.533005414358309 0.694919858592324 0.898312466101671 0.86860527594961 0.955803415566669 0.987661262815103 "SAS"
16 0.183914580493518 0.415368373177042 0.595047330565895 0.475031255360148 0.640953295829747 0.733953562280719 0.206037440966141 0.292386923511083 0.355967833255347 -0.407184432479765 -0.213419040771044 0.0582480108711551 0.515731476088686 0.707355943956714 0.938366446707865 0.916509817290009 0.949314321957191 0.97653841602754 "SEA"
17 0.242779703393965 0.597823242058265 0.756354341697345 0.611946287039767 0.724851539746866 0.800620874765536 0.464847318598046 0.593216811098936 0.700063253945103 -0.219770977051454 -0.114828053965117 0.00832633141975128 0.732803322666492 0.8652456010155 1.10090985733454 0.866559972935727 0.953180903795662 0.984705964412575 "SSA"
18 0.319578973914226 0.582230777825586 0.709080991468475 0.561085517415519 0.704309437703684 0.786437293891562 0.169100754118121 0.36510391608008 0.486942102096393 -0.149953778860126 0.0184907929157102 0.202651433892726 0.606915044140578 0.837182282715213 1.04647440078471 0.816818055573637 0.94220513231829 0.977365962361514 "WAF"
19 -0.594347616732853 -0.0523476147037751 0.425900348571706 0.148314232444853 0.338305348699878 0.595682341851404 0.120998795664452 0.217137745572923 0.377162645956623 -0.481397051645318 -0.120559893224262 0.168994847320412 0.583039632043166 0.720080779716663 1.04428274893827 0.423687013801475 0.68473755872441 0.823255146276972 "WAS"
20 0.15162767767219 0.458591772636454 0.645270339819004 0.471520909240259 0.634900975088541 0.752740840369163 0.213702852519604 0.329966713365924 0.444858035096136 -0.353600881860839 -0.148194797659743 0.281486732705017 0.570098739763058 0.722945936455607 1.0207198540551 0.716787206615138 0.891660030694423 0.95194816520579 "WNA"
